# Supplementary material for: Electrochemically-mediated C–H functionalization of allenes and 1,3-dicarbonyl compounds to construct tetrasubstituted furans
Source: Royal Society of Chemistry journal article supplement (doi:10.1039/d1qo01458g), 2021-12-20

# Supporting Information

## Electrochemically-mediated C-H functionalization of allenes and 1,3-carbonyl compounds to construct tetrasubstituted furans

Mu-Xue He <sup>a,b</sup>, Yan Yao <sup>a</sup>, Chun-Zhi Ai <sup>\*a</sup>, Zu-Yu Mo <sup>c</sup>, Yu-Zheng Wu <sup>a</sup>, Qi Zhou <sup>d</sup>, Ying-Ming Pan <sup>a</sup>, Hao-Tao Tang <sup>\*a</sup>

<sup>a</sup> State Key Laboratory for Chemistry and Molecular Engineering of Medicinal Resources, School of Chemistry and Pharmaceutical Sciences, Guangxi Normal University, Guilin 541004, China

<sup>b</sup> School of Public Health, Guilin Medical University, Guilin 541004, China

<sup>c</sup> Pharmacy School, Guilin Medical University, Guilin 541004, China

<sup>d</sup> Adesis Inc. A Universal Display company, New Castle, Delaware 19720, United States

\* E-mail: [httang@gxnu.edu.cn](mailto:httang@gxnu.edu.cn)

### Table of Contents

|                                                                                 |     |
|---------------------------------------------------------------------------------|-----|
| 1. General Information .....                                                    | S2  |
| 2. Procedures for the Electrolysis .....                                        | S3  |
| 3. Procedure for the Synthesis Allenes .....                                    | S4  |
| 4. Additional Optimization of Reaction Conditions.....                          | S5  |
| 5. Control Experiments .....                                                    | S6  |
| 6. The HRMS Spectra of Compounds 4-9 .....                                      | S7  |
| 7. Cyclic Voltammetry Studies.....                                              | S13 |
| 8. X-ray Crystallography Data .....                                             | S16 |
| 9. Study on Antitumor Activity.....                                             | S27 |
| 10. Characterization Data for the Electrolysis Products.....                    | S29 |
| 11. Copies of <sup>1</sup> H NMR and <sup>13</sup> C NMR for the Products ..... | S43 |

## 1. General Information

Without special instructions, all reagents and solvents were commercially available and were not further purified. Column chromatography was carried out using silica gel (300-400 mesh). NMR spectroscopy was performed on Bruker AV-400 or Bruker AV-600 instruments. Chemical shifts for  $^1\text{H}$  NMR spectra are reported as  $\delta$  in units of parts per million (ppm) downfield from TMS ( $\delta$  0.00) and relative to the signal of chloroform-d ( $\delta$  7.26, singlet). The abbreviations used to explain the multiplicities were as follows: s, singlet; d, doublet; t, triplet; m, multiplet; brs, broad singlet and J, coupling constant in Hz.  $^{13}\text{C}$  NMR spectra are reported as  $\delta$  in units of parts per million (ppm) downfield from TMS ( $\delta$  0.00) and relative to the signal of chloroform-d ( $\delta$  77.00, triplet). The HRMS spectrum was measured by micromass QTOF2 Quadrupole/Time of Flight Tandem mass spectrometer with electron spray ionization. Cyclic voltammograms were recorded on a CHI 660E potentiostat.

## 2. Procedures for the Electrolysis

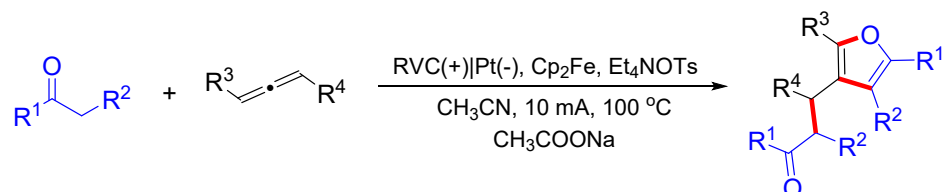

A 10 ml three-necked round-bottomed flask was charged with 1,3-carbonyl compounds (0.3 mmol, 1.0 equiv.), allenes (0.45 mmol, 1.5 equiv.), Cp<sub>2</sub>Fe (0.03 mmol, 10 mol %), CH<sub>3</sub>COONa (0.3 mmol, 1.0 equiv.), Et<sub>4</sub>NOTs (0.6 mmol, 2.0 equiv.). The flask was equipped with a reticulated vitreous carbon RVC (100 PPI, 1 cm x 1 cm x 1.2 cm) anode and a platinum plate (1 cm x 1 cm) cathode. CH<sub>3</sub>CN (6 mL) was added under air atmosphere. Electrolysis was carried out at 100 °C (oil bath temperature), which using a constant current of 10 mA until the substrate was completely consumed (monitored by TLC, about 2 hours). After the reaction was completed, the solvent was concentrated under reduced pressure. Purification with silica gel column chromatography using ethyl acetate/petroleum ether to afford the desired products. The pictures of reaction set-up were shown in **Figure S1**.

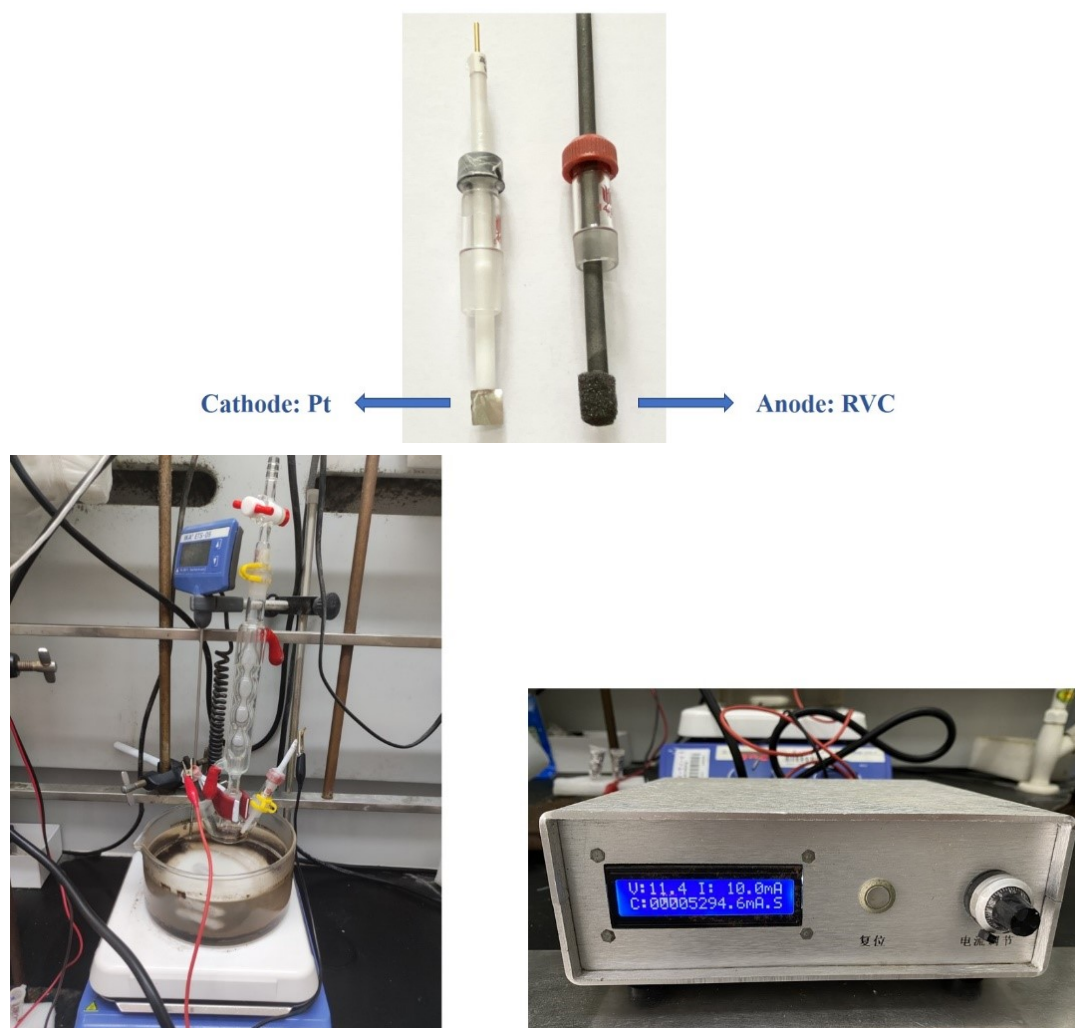

**Figure S1.** Electrolysis setup. (undivided cell)

### Procedure for the synthesis intermediate 10:

A 10 ml three-necked round-bottomed flask was charged with ethyl (4-methoxybenzoyl)acetate **1a** (0.3 mmol, 1.0 equiv.), (4-methoxyphenyl)allene **2a** (0.45 mmol, 1.5 equiv.), Cp<sub>2</sub>Fe (0.03 mmol, 10 mol %), CH<sub>3</sub>COONa (0.3 mmol, 1.0 equiv.), Et<sub>4</sub>NOTs (0.6 mmol, 2.0 equiv.). The flask was equipped with a reticulated vitreous carbon RVC (100 PPI, 1 cm x 1 cm x 1.2 cm) anode and a platinum plate (1 cm x 1 cm) cathode. CH<sub>3</sub>CN (6 mL) was added under air atmosphere. Electrolysis was carried out at 100 °C (oil bath temperature), which using a constant current of 10 mA until the generated intermediate **10** no longer increases (monitored by TLC, about 1 hour). The solvent was concentrated under reduced pressure. Purification with silica gel column chromatography using ethyl acetate/petroleum ether to afford the intermediate **10**.

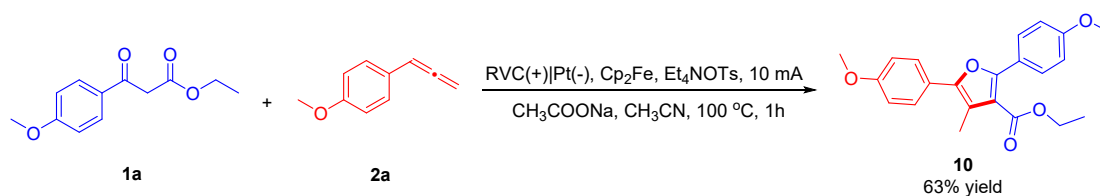

### 3. Procedure for the Synthesis Allenes

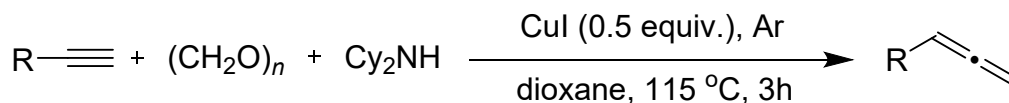

The terminal allenes were prepared according to literature procedure [1]. Solid paraformaldehyde (125 mmol, 2.5 equiv.) and cuprous iodide (25 mmol, 0.5 equiv.) were weighed and added to a 500 mL round-bottomed flask. Argon was filled, and the gas was pumped to remove the air from the flask. The terminal alkynes (50 mmol, 1.0 equiv.) and dicyclohexylamine (90 mmol, 1.8 equiv.) were then measured and added to the round-bottomed flask. The solvent 1,4-dioxane (120 mL) was added and the solid was fully dissolved. Reaction mixture was stirred at 115 °C (oil bath temperature) for 3h and cooled to room temperature. Subsequently, 50 mL of water and 50 mL of diethyl ether were added for extraction. The aqueous phase was extracted three times with 50 mL of diethyl ether, and the organic phase was collected. The collected organic phase was extracted with 50 mL saturated NaCl solution once and dried with anhydrous  $\text{Na}_2\text{SO}_4$ . The filtered solution was concentrated under reduced pressure to obtain an oily liquid. Finally, the concentrate was purified by silica gel column chromatography using petroleum ether as eluent to afford the terminal allenes.

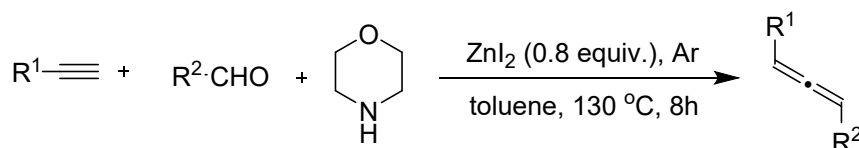

The 1,3-disubstituted allenes were prepared according to literature procedure [2]. Solid zinc iodide (40 mmol, 0.8 equiv.) was weighed and added to a 500 mL round-bottomed flask. Argon was filled, and the gas was pumped to remove the air from the flask. The terminal alkynes (50 mmol, 1.0 equiv.), aldehydes (90 mmol, 1.8 equiv.) and morpholine (70 mmol, 1.4 equiv.) were then measured and added to the round-bottomed flask. The solvent toluene (120 mL) was added and the solid was fully dissolved. Reaction mixture was stirred at 130°C (oil bath temperature) for 8h and cooled to room temperature. Subsequently, 50 mL of water and 50 mL of diethyl ether were added for extraction. The aqueous phase was extracted three times with 50 mL of diethyl ether, and the organic phase was collected. The collected organic phase was extracted with 50 mL saturated NaCl solution once and dried with anhydrous  $\text{Na}_2\text{SO}_4$ . The filtered solution was concentrated under reduced pressure to obtain an oily liquid. Ultimately, the concentrate was purified by silica gel column chromatography using petroleum ether as eluent to afford the 1,3-disubstituted allenes.

#### References:

- 1 J.-Q. Kuang and S.-M. Ma, *J. Org. Chem.*, 2009, **74**, 1763.
- 2 J.-Q. Kuang and S.-M. Ma, *J. Am. Chem. Soc.*, 2010, **132**, 1786.

## 4. Additional Optimization of Reaction Conditions

**Table S1.** Optimization of the reaction conditions<sup>a</sup>

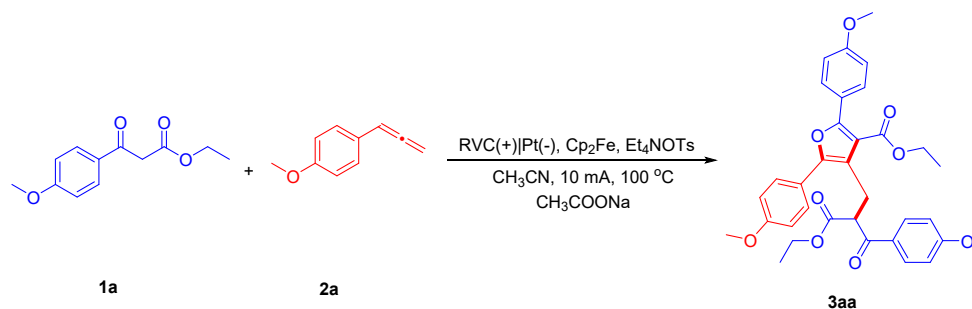

| Entry | Variation from standard conditions                       | Yield <sup>b</sup> (%) |
|-------|----------------------------------------------------------|------------------------|
| 1     | 5 mA                                                     | 56                     |
| 2     | 15 mA                                                    | 52                     |
| 3     | <i>n</i> Bu <sub>4</sub> NBF <sub>4</sub> as electrolyte | 80                     |
| 4     | <i>n</i> Bu <sub>4</sub> NPF <sub>6</sub> as electrolyte | 81                     |
| 5     | Et <sub>4</sub> NPF <sub>6</sub> as electrolyte          | 73                     |
| 6     | Na <sub>2</sub> CO <sub>3</sub> as base                  | 33                     |
| 7     | Cs <sub>2</sub> CO <sub>3</sub> as base                  | trace                  |
| 8     | NaOEt as base                                            | 16                     |
| 9     | DBU as base                                              | 23                     |
| 10    | RVC (+)   RVC (-)                                        | 55                     |
| 11    | Pt (+)   RVC (-)                                         | trace                  |
| 12    | Pt (+)   Pt (-)                                          | trace                  |
| 13    | C (+)   Pt (-)                                           | 44                     |
| 14    | RVC (+)   Ag (-)                                         | 56                     |
| 15    | RVC (+)   Ni (-)                                         | 62                     |
| 16    | RVC (+)   Pb (-)                                         | 47                     |
| 17    | <b>1a</b> : <b>2a</b> = 1.5 : 1                          | 41                     |
| 18    | <b>1a</b> : <b>2a</b> = 1 : 1                            | 46                     |
| 19    | <b>1a</b> : <b>2a</b> = 1 : 2                            | 59                     |

<sup>a</sup> Reaction conditions: reticulated vitreous carbon (RVC) anode (100 PPI, 1 cm × 1 cm × 1.2 cm), Pt plate cathode (1 cm × 1 cm), undivided cell, **1a** (0.3 mmol, 1.0 equiv.), **2a** (0.45 mmol, 1.5 equiv.), catalyst (10 mol %), base (1.0 equiv.), electrolyte (2.0 equiv.), CH<sub>3</sub>CN (6 mL), under air atmosphere, 10 mA, 100 °C, 2 h (2.5 F mol<sup>-1</sup>). <sup>b</sup> Isolated yield.

## 5. Control Experiments

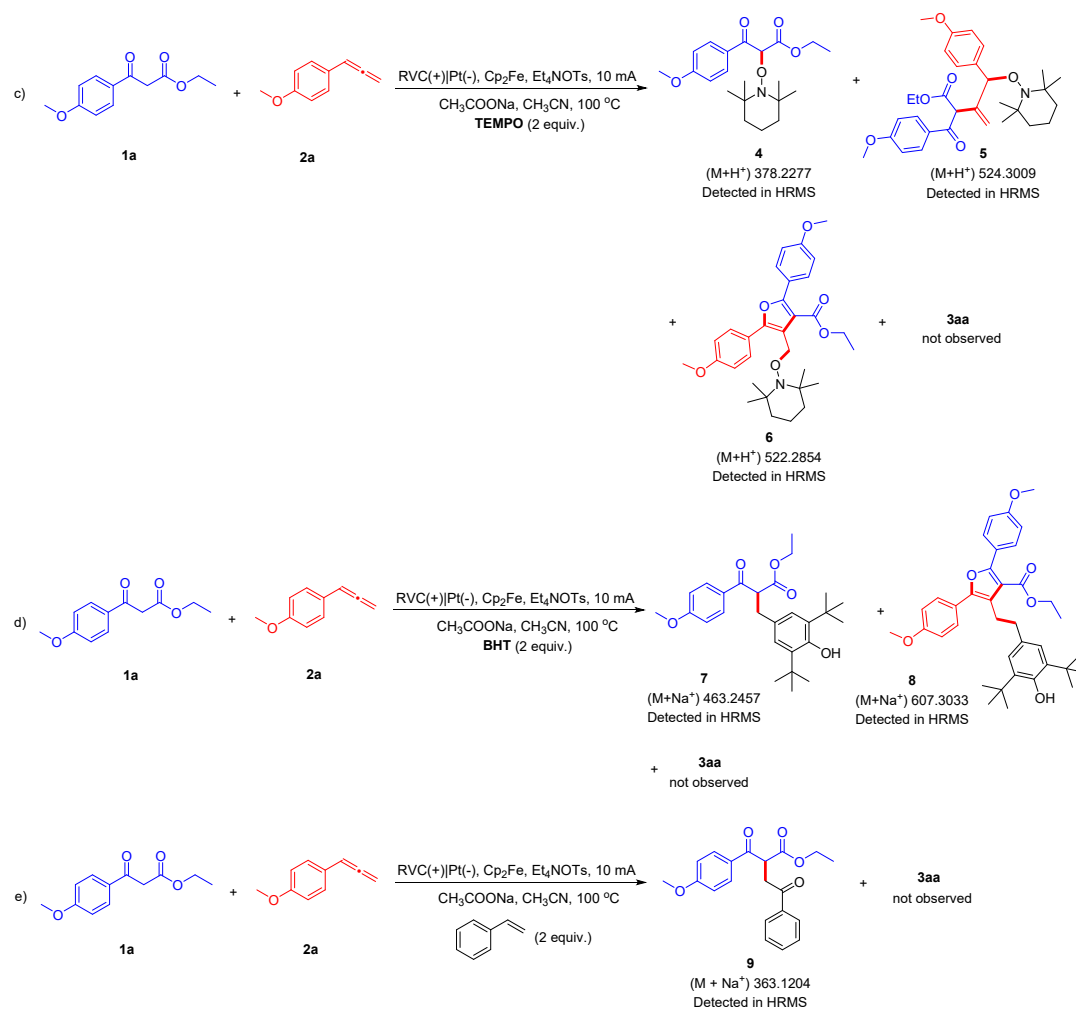

**Scheme S1.** Control experiments.

## 6. The HRMS Spectra of Compounds 4-9

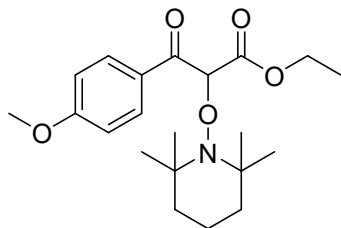

Compound **4**: HRMS(m/z) [ESI]: calculated for  $C_{21}H_{32}NO_5^+[M+H]^+$ : 378.2275, found 378.2277.

|             |                         |                        |         |                 |                      |
|-------------|-------------------------|------------------------|---------|-----------------|----------------------|
| Sample Name | HMX-Tempo-1-0124        | Position               | PID1    | Instrument Name | Instrument 1         |
| User Name   |                         | Inj Vol                | 0.2     | InjPosition     |                      |
| Sample Type | Sample                  | IRM Calibration Status | Success | Data Filename   | HMX-Tempo-1-1-0124.d |
| ACQ Method  | 10-100% jiachun Zheng.m | Comment                |         | Acquired Time   | 1/24/2021 7:14:38 PM |

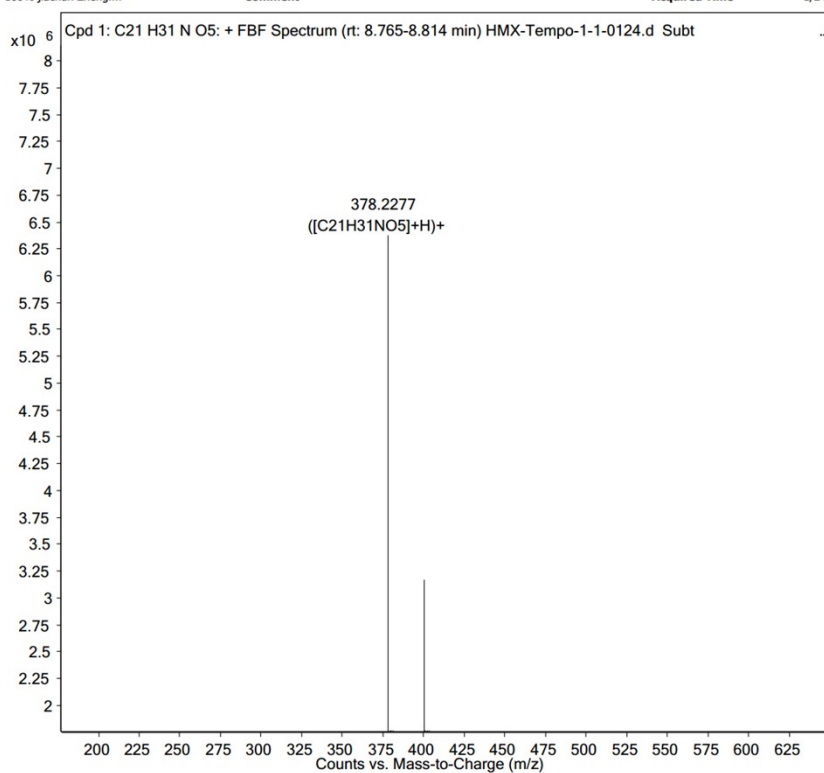



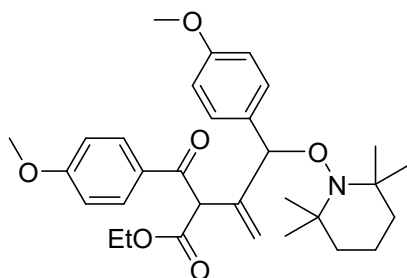

Compound **5**: HRMS( $m/z$ ) [ESI]: calculated for  $C_{31}H_{42}NO_6^+[M+H]^+$ : 524.3007, found 524.3009.

|             |                         |                        |         |                 |                      |
|-------------|-------------------------|------------------------|---------|-----------------|----------------------|
| Sample Name | HMX-Tempo-1-0124        | Position               | PID1    | Instrument Name | Instrument 1         |
| User Name   |                         | Inj Vol                | 0.2     | InjPosition     |                      |
| Sample Type | Sample                  | IRM Calibration Status | Success | Data Filename   | HMX-Tempo-1-1-0124.d |
| ACQ Method  | 10-100% jiachun Zheng.m | Comment                |         | Acquired Time   | 1/24/2021 7:14:38 PM |

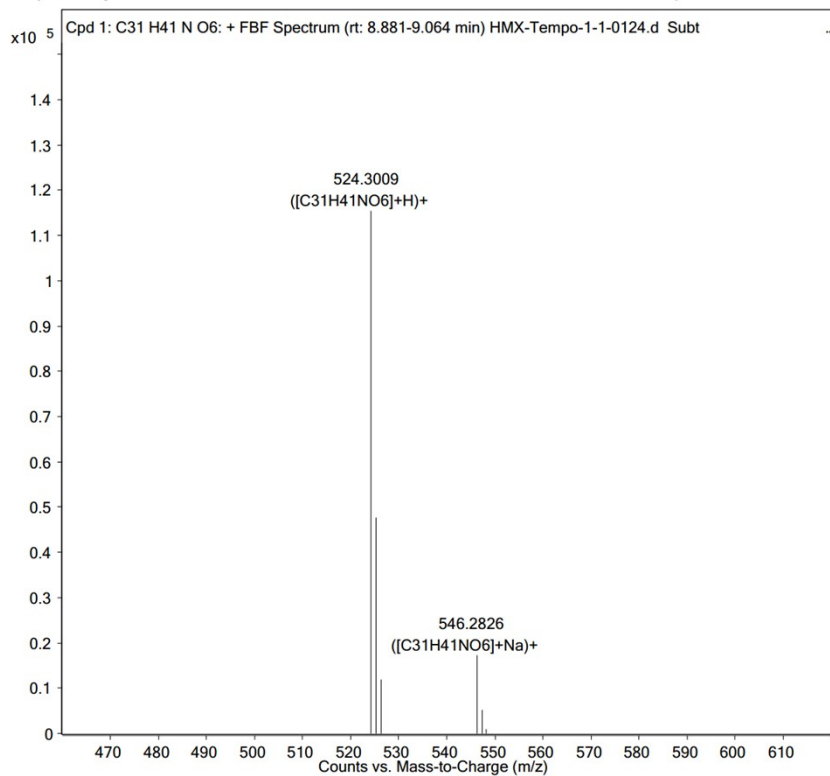

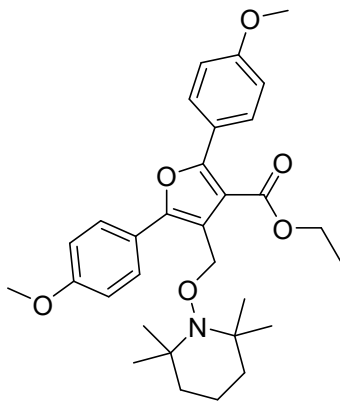

Compound **6**: HRMS(m/z) [ESI]: calculated for  $C_{31}H_{40}NO_6^+[M+H]^+$ : 522.2850, found 522.2854.

|                    |                         |                               |         |                        |                       |
|--------------------|-------------------------|-------------------------------|---------|------------------------|-----------------------|
| <b>Sample Name</b> | HMX-LX-Tempo-2-0124     | <b>Position</b>               | P1-B1   | <b>Instrument Name</b> | Instrument 1          |
| <b>User Name</b>   |                         | <b>Inj Vol</b>                | 0.2     | <b>InjPosition</b>     |                       |
| <b>Sample Type</b> | Sample                  | <b>IRM Calibration Status</b> | Success | <b>Data Filename</b>   | HMX-LX-Tempo-2-0124.d |
| <b>ACQ Method</b>  | 10-100% jiachun Zheng.m | <b>Comment</b>                |         | <b>Acquired Time</b>   | 1/24/2021 9:18:12 PM  |

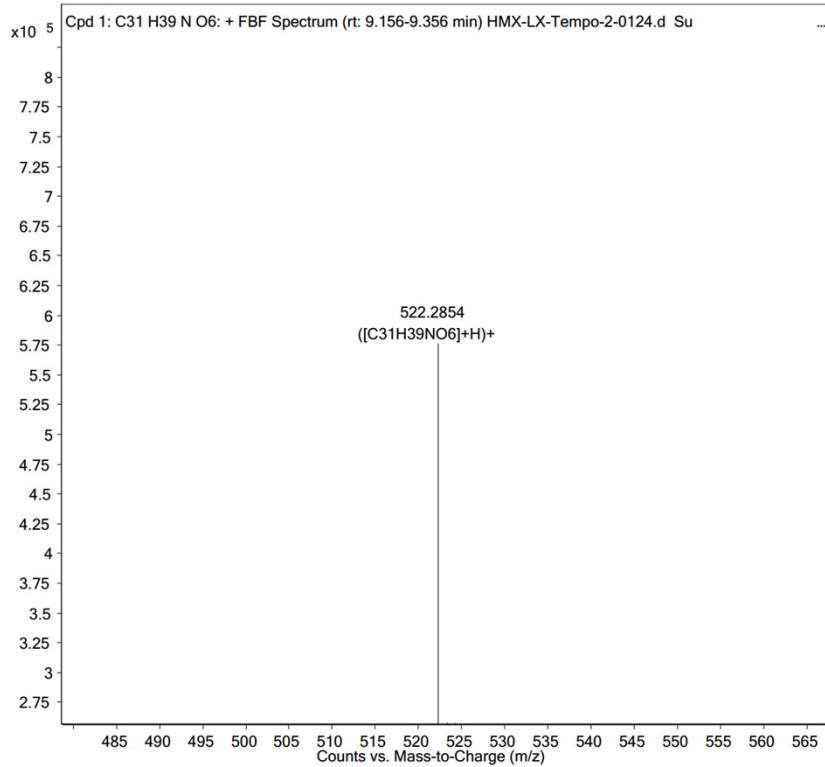

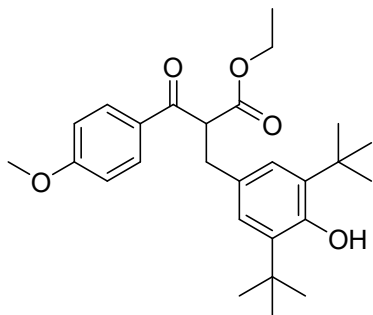

**Compound 7:** HRMS(m/z) [ESI]: calculated for  $C_{27}H_{36}O_5+Na^+$  [M+Na]<sup>+</sup>: 463.2455, found 463.2457.

|                    |                         |                               |         |                        |                       |
|--------------------|-------------------------|-------------------------------|---------|------------------------|-----------------------|
| <b>Sample Name</b> | HMX-LX-BHT-2-0124       | <b>Position</b>               | P1-D4   | <b>Instrument Name</b> | Instrument 1          |
| <b>User Name</b>   |                         | <b>Inj Vol</b>                | 0.2     | <b>InjPosition</b>     |                       |
| <b>Sample Type</b> | Sample                  | <b>IRM Calibration Status</b> | Success | <b>Data Filename</b>   | HMX-LX-BHT-2-1-0124.d |
| <b>ACQ Method</b>  | 10-100% jiachun Zheng.m | <b>Comment</b>                |         | <b>Acquired Time</b>   | 1/24/2021 8:03:58 PM  |

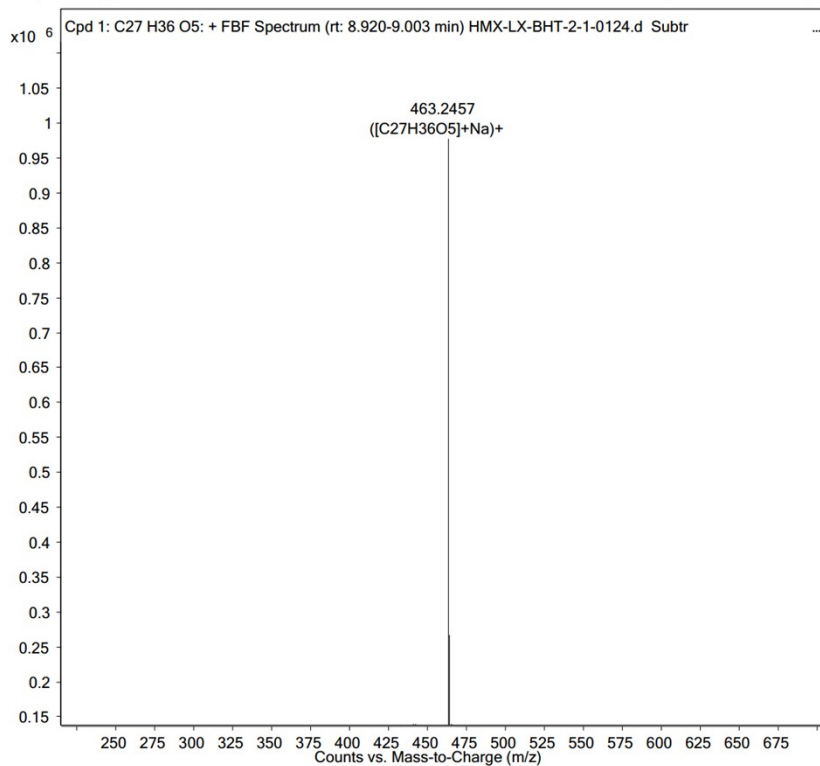

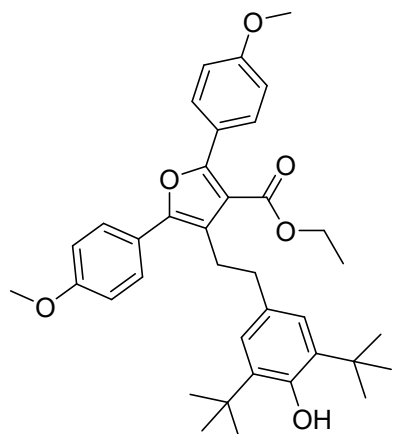

Compound **8**: HRMS(m/z) [ESI]: calculated for  $C_{37}H_{44}O_6+Na^+$   $[M+Na]^+$ : 607.3030, found 607.3033.

|                    |                         |                               |         |                        |                       |
|--------------------|-------------------------|-------------------------------|---------|------------------------|-----------------------|
| <b>Sample Name</b> | HMX-LX-BHT-2-0124       | <b>Position</b>               | P1-D4   | <b>Instrument Name</b> | Instrument 1          |
| <b>User Name</b>   |                         | <b>Inj Vol</b>                | 0.2     | <b>InjPosition</b>     |                       |
| <b>Sample Type</b> | Sample                  | <b>IRM Calibration Status</b> | Success | <b>Data Filename</b>   | HMX-LX-BHT-2-1-0124.d |
| <b>ACQ Method</b>  | 10-100% jiachun Zheng.m | <b>Comment</b>                |         | <b>Acquired Time</b>   | 1/24/2021 8:03:58 PM  |

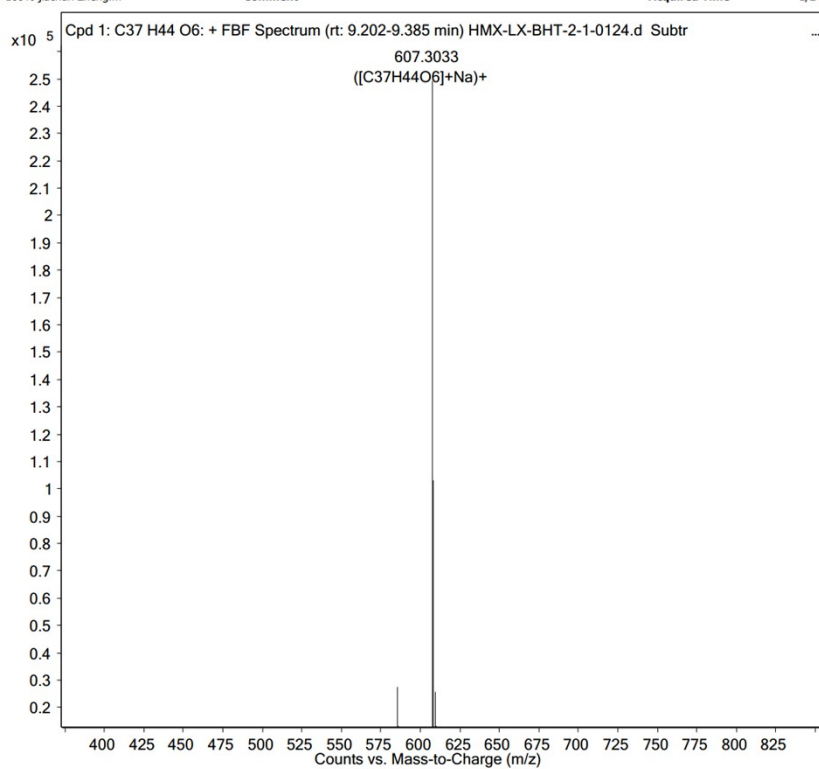

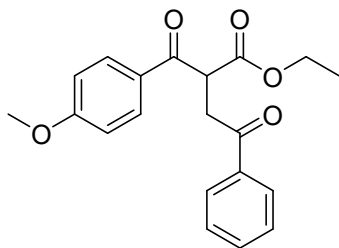

Compound **9**: HRMS(m/z) [ESI]: calculated for  $C_{20}H_{20}O_5+Na^+$   $[M+Na]^+$ : 363.1203, found 363.1204.

|             |                         |                        |         |                 |                      |
|-------------|-------------------------|------------------------|---------|-----------------|----------------------|
| Sample Name | HMX-LX-BYX-2-0124       | Position               | P1-D5   | Instrument Name | Instrument 1         |
| User Name   |                         | Inj Vol                | 0.2     | Inj Position    |                      |
| Sample Type | Sample                  | IRM Calibration Status | Success | Data Filename   | HMX-LX-BYX-2-0124.d  |
| ACQ Method  | 10-100% jiachun Zheng.m | Comment                |         | Acquired Time   | 1/24/2021 9:37:57 PM |

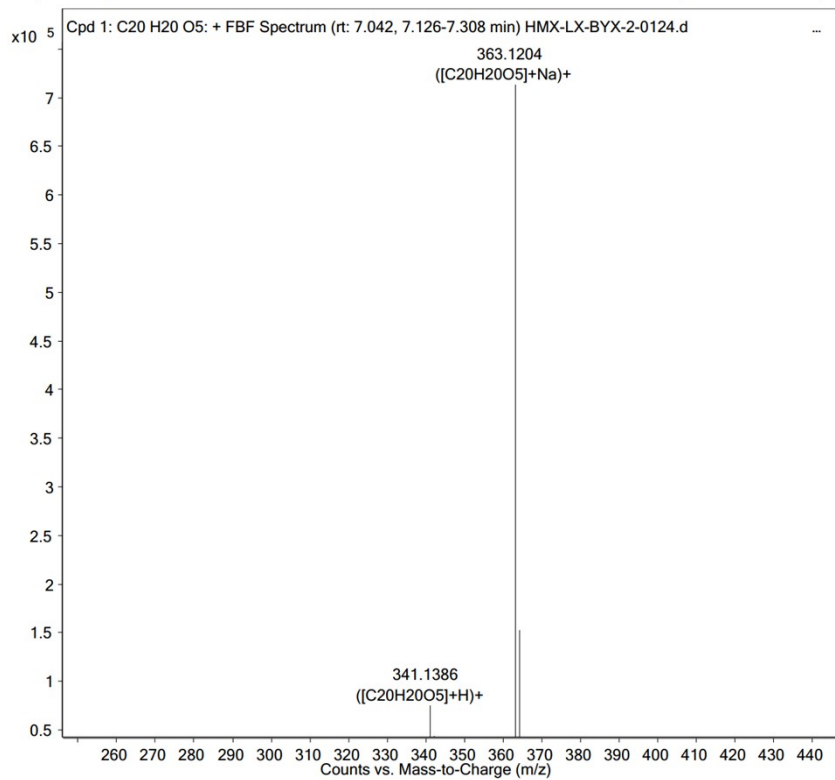

## 7. Cyclic Voltammetry Studies

The cyclic voltammograms were recorded in an electrolyte solution of Et<sub>4</sub>NOTs (0.1 M) in CH<sub>3</sub>CN using a glassy carbon disk working electrode (diameter, 3 mm), a Pt wire auxiliary electrode and a Ag/AgCl reference electrode. The scan rate was 100 mV/s.

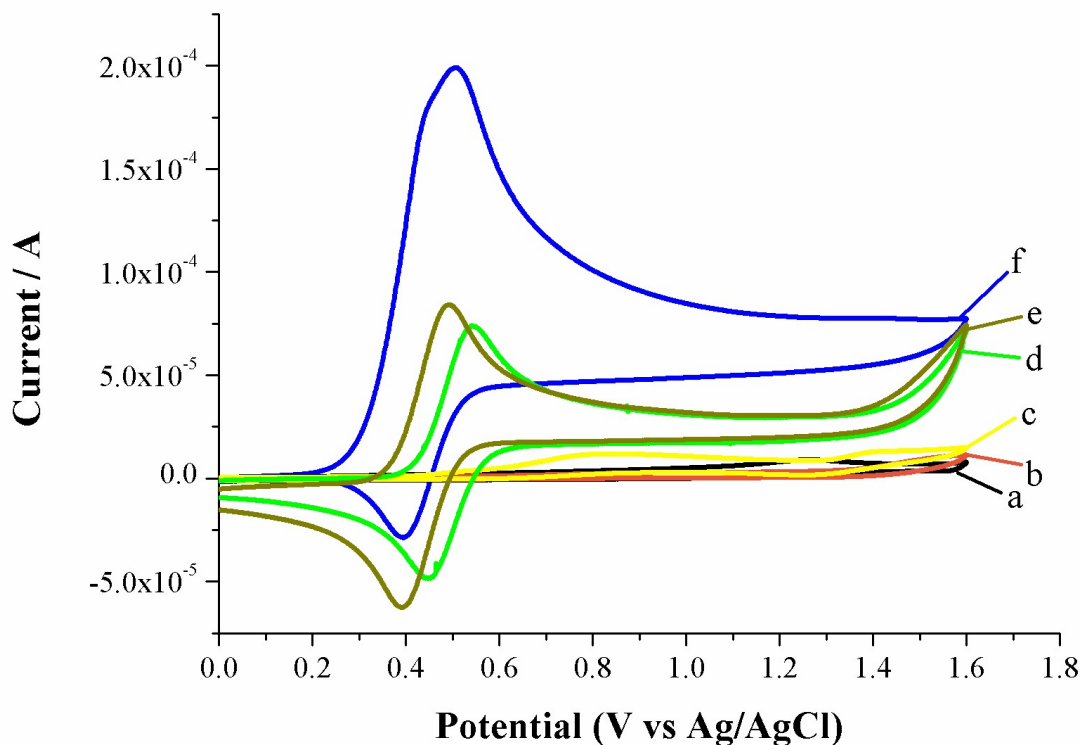

**Figure S2-1.** Cyclic voltammograms. (a) background; (b) **1a** (12 mM); (c) **1a** (12 mM) + CH<sub>3</sub>COONa (12 mM); (d) Cp<sub>2</sub>Fe; (e) Cp<sub>2</sub>Fe + **1a** (12 mM); (f) Cp<sub>2</sub>Fe + **1a** (12 mM) + CH<sub>3</sub>COONa (12 mM).

We measured the cyclic voltammogram of the substrate **1a**, from which the oxidation potential of **1a** was 1.44V vs. Ag/AgCl (Figure S2-1, Curve b). The cyclic voltammogram in the presence of both **1a** and CH<sub>3</sub>COONa was also studied (Figure S2-1, Curve c). At this point, substrate **1a** deproton into the form of a carbon anion intermediate under the influence of CH<sub>3</sub>COONa. Therefore, this curve shows that the oxidation potential of the conjugate base of **1a** is 0.84 V vs. Ag/AgCl. According to the cyclic voltammogram of Cp<sub>2</sub>Fe (Figure S2-1, Curve d), its oxidation potential is 0.54 V vs. Ag/AgCl. It can be seen from the above results that the oxidation potential of Cp<sub>2</sub>Fe is closer to that of the conjugate base of **1a**, so ferrocene is easier to oxidize the conjugate base of **1a**. Moreover, the curve of Cp<sub>2</sub>Fe and **1a** (Figure S2-1, curve e) had almost no change in current compared to the curve of Cp<sub>2</sub>Fe (Figure S2-1, curve d). However, the current of Cp<sub>2</sub>Fe, **1a** and CH<sub>3</sub>COONa (Figure S2-1, curve f) showed a significant increase, indicating that electron transfer was performed. In summary, Cp<sub>2</sub>Fe and **1a** are difficult to react directly under electrochemical conditions, but Cp<sub>2</sub>Fe catalyzed the conjugate base of **1a** to promote the reaction. Adding another substrate **2a** under the same conditions (Figure S2-2), the change of curve was similar and the same conclusion could be obtained.

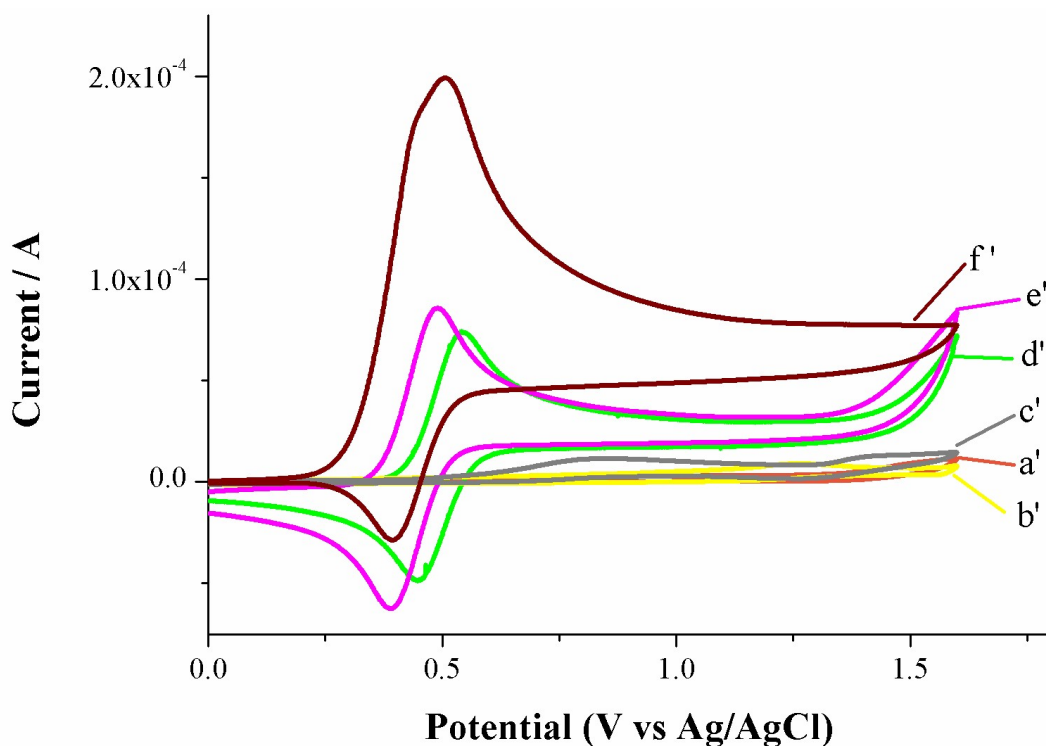

**Figure S2-2.** Cyclic voltammograms. (a') **1a** (12 mM); (b') **2a** (12 mM); (c') **1a** (12 mM) + **2a** (12 mM); (d') Cp<sub>2</sub>Fe; (e') Cp<sub>2</sub>Fe + **1a** (12 mM) + **2a** (12 mM); (f') Cp<sub>2</sub>Fe + **1a** (12 mM) + **2a** (12 mM) + CH<sub>3</sub>COONa (12 mM).

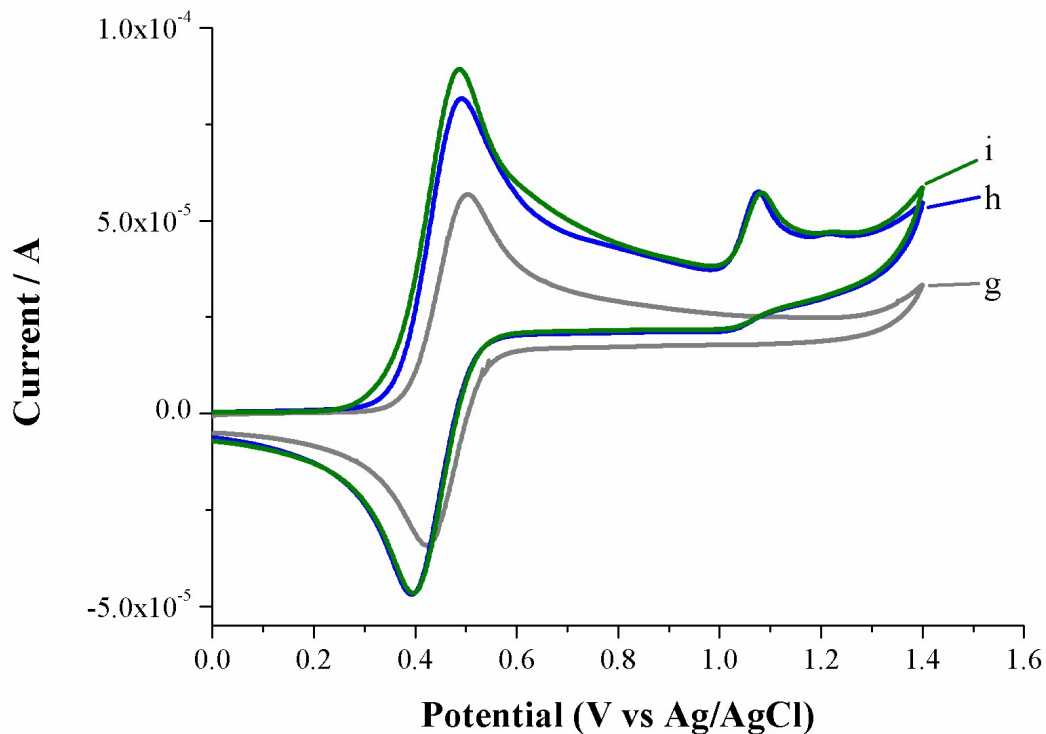

**Figure S2-3.** Cyclic voltammograms. (g) Cp<sub>2</sub>Fe + CH<sub>3</sub>COONa (12 mM); (h) Cp<sub>2</sub>Fe + **10** (12 mM) + CH<sub>3</sub>COONa (12 mM); (i) Cp<sub>2</sub>Fe + **10** (12 mM) + **1a** (12 mM) + CH<sub>3</sub>COONa (12 mM).

We studied the cyclic voltammogram of reaction intermediate **10** (Figure S2-3). Compared with the cyclic voltammogram without adding any reaction substrate or intermediate (Figure S2-3, Curve g), the curve with adding intermediate **10** (Figure S2-3, Curve h) has an additional oxidation peak, whose oxidation potential is 1.08V vs. Ag/AgCl. The results show that there is an oxidation process of the intermediate **10** under the electrochemical conditions. We also measured the cyclic voltammogram (Figure S2-3, Curve i) in the presence of both the intermediate **10** and the substrate **1a**, and it showed no significant change compared with the curve in the presence of **10**. The above experimental results indicate that in the further reaction between intermediate **10** and substrate **1a**, only **10** is oxidized, while **1a** participates in the next reaction in the form of its conjugate base.



## 8. X-ray Crystallography Data

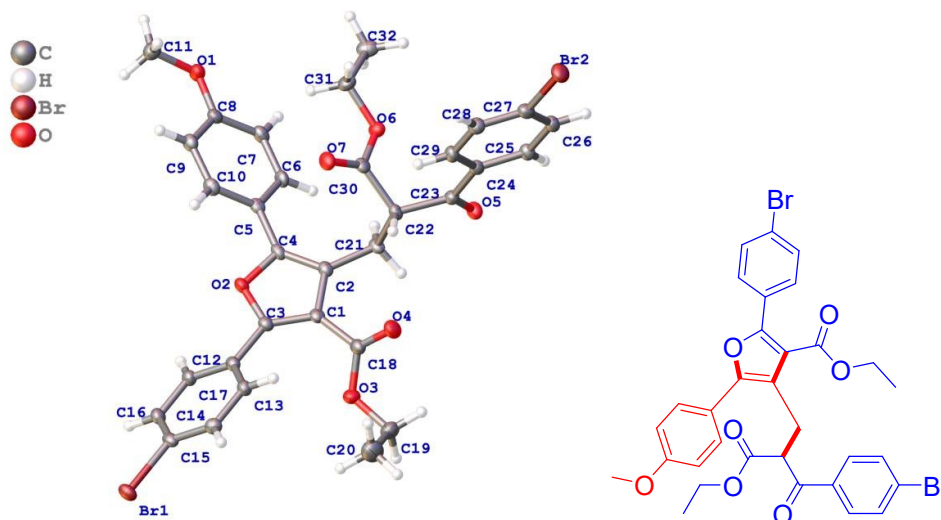

Figure S3. X-ray Structure of **3ga**, CCDC number: 2036760.

### Crystal structure determination of **3ga**

**Crystal Data** for  $C_{32}H_{28}Br_2O_7$  ( $M=684.36$  g/mol): triclinic, space group P-1 (no. 2),  $a = 5.5321(2)$  Å,  $b = 12.1112(4)$  Å,  $c = 21.5318(6)$  Å,  $\alpha = 84.490(3)^\circ$ ,  $\beta = 89.273(3)^\circ$ ,  $\gamma = 81.405(3)^\circ$ ,  $V = 1419.84(8)$  Å<sup>3</sup>,  $Z = 2$ ,  $T = 100.00(10)$  K,  $\mu(\text{Cu K}\alpha) = 4.032$  mm<sup>-1</sup>,  $D_{\text{calc}} = 1.601$  g/cm<sup>3</sup>, 9433 reflections measured ( $4.122^\circ \leq 2\theta \leq 147.484^\circ$ ), 5536 unique ( $R_{\text{int}} = 0.0351$ ,  $R_{\text{sigma}} = 0.0466$ ) which were used in all calculations. The final  $R_1$  was 0.0421 ( $I > 2\sigma(I)$ ) and  $wR_2$  was 0.1231 (all data).

**Table S2** Crystal data and structure refinement for **3ga**.

|                                             |                                                                |
|---------------------------------------------|----------------------------------------------------------------|
| Empirical formula                           | C <sub>32</sub> H <sub>28</sub> Br <sub>2</sub> O <sub>7</sub> |
| Formula weight                              | 684.36                                                         |
| Temperature/K                               | 100.00(10)                                                     |
| Crystal system                              | triclinic                                                      |
| Space group                                 | P-1                                                            |
| a/Å                                         | 5.5321(2)                                                      |
| b/Å                                         | 12.1112(4)                                                     |
| c/Å                                         | 21.5318(6)                                                     |
| α/°                                         | 84.490(3)                                                      |
| β/°                                         | 89.273(3)                                                      |
| γ/°                                         | 81.405(3)                                                      |
| Volume/Å <sup>3</sup>                       | 1419.84(8)                                                     |
| Z                                           | 2                                                              |
| ρ <sub>calc</sub> /cm <sup>3</sup>          | 1.601                                                          |
| μ/mm <sup>-1</sup>                          | 4.032                                                          |
| F(000)                                      | 692.0                                                          |
| Crystal size/mm <sup>3</sup>                | 0.12 × 0.1 × 0.08                                              |
| Radiation                                   | Cu Kα (λ = 1.54184)                                            |
| 2θ range for data collection/°              | 4.122 to 147.484                                               |
| Index ranges                                | -6 ≤ h ≤ 4, -15 ≤ k ≤ 14, -26 ≤ l ≤ 26                         |
| Reflections collected                       | 9433                                                           |
| Independent reflections                     | 5536 [R <sub>int</sub> = 0.0351, R <sub>sigma</sub> = 0.0466]  |
| Data/restraints/parameters                  | 5536/0/373                                                     |
| Goodness-of-fit on F <sup>2</sup>           | 1.060                                                          |
| Final R indexes [I ≥ 2σ(I)]                 | R <sub>1</sub> = 0.0421, wR <sub>2</sub> = 0.1173              |
| Final R indexes [all data]                  | R <sub>1</sub> = 0.0507, wR <sub>2</sub> = 0.1231              |
| Largest diff. peak/hole / e Å <sup>-3</sup> | 0.55/-1.25                                                     |

**Table S3** Fractional Atomic Coordinates ( $\times 10^4$ ) and Equivalent Isotropic Displacement Parameters ( $\text{\AA}^2 \times 10^3$ ) for **3ga**.  $U_{\text{eq}}$  is defined as 1/3 of the trace of the orthogonalised  $U_{ij}$  tensor.

| Atom | <i>x</i>   | <i>y</i>   | <i>z</i>    | $U(\text{eq})$ |
|------|------------|------------|-------------|----------------|
| Br1  | -4315.7(7) | 11547.1(3) | 9144.7(2)   | 22.75(12)      |
| Br2  | 2892.3(8)  | 1622.1(3)  | 4755.7(2)   | 28.17(13)      |
| O1   | 11780(5)   | 3123(2)    | 9694.2(12)  | 25.7(6)        |
| O2   | 4694(5)    | 7321(2)    | 8477.3(11)  | 18.8(5)        |
| O3   | 2625(5)    | 9468(2)    | 6846.2(12)  | 26.6(6)        |
| O4   | 2563(6)    | 7833(2)    | 6436.9(13)  | 29.7(6)        |
| O5   | 9043(5)    | 5486(2)    | 5913.1(12)  | 21.9(5)        |
| O6   | 8466(5)    | 3779(2)    | 7217.5(12)  | 20.3(5)        |
| O7   | 4698(5)    | 4283(2)    | 7602.9(12)  | 24.2(6)        |
| C1   | 4045(7)    | 7805(3)    | 7465.0(16)  | 18.2(7)        |
| C2   | 6025(7)    | 6882(3)    | 7527.2(16)  | 18.0(7)        |
| C3   | 3306(7)    | 8034(3)    | 8050.9(16)  | 18.0(7)        |
| C4   | 6354(6)    | 6612(3)    | 8154.4(16)  | 17.7(7)        |
| C5   | 7792(7)    | 5723(3)    | 8554.1(16)  | 17.3(7)        |
| C6   | 10173(7)   | 5252(3)    | 8407.5(17)  | 20.0(7)        |
| C7   | 11443(7)   | 4385(3)    | 8792.6(17)  | 21.5(8)        |
| C8   | 10364(7)   | 3967(3)    | 9338.2(17)  | 20.3(7)        |
| C9   | 7986(7)    | 4422(3)    | 9490.9(17)  | 20.5(7)        |
| C10  | 6762(7)    | 5292(3)    | 9100.6(17)  | 20.1(7)        |
| C11  | 10665(8)   | 2624(3)    | 10232.7(18) | 26.1(8)        |
| C12  | 1458(7)    | 8865(3)    | 8311.9(16)  | 17.7(7)        |
| C13  | -821(7)    | 9203(3)    | 8021.6(17)  | 20.6(7)        |
| C14  | -2548(7)   | 9998(3)    | 8265.8(17)  | 19.4(7)        |
| C15  | -1987(7)   | 10450(3)   | 8805.4(17)  | 19.5(7)        |
| C16  | 238(7)     | 10120(3)   | 9102.6(17)  | 20.6(7)        |
| C17  | 1948(7)    | 9322(3)    | 8857.5(16)  | 19.9(7)        |
| C18  | 2981(7)    | 8343(3)    | 6862.4(17)  | 20.1(7)        |
| C19  | 1586(9)    | 10081(4)   | 6270.8(19)  | 33.4(10)       |
| C20  | -1153(10)  | 10361(4)   | 6323(2)     | 42.8(12)       |
| C21  | 7416(7)    | 6368(3)    | 6993.8(16)  | 17.4(7)        |
| C22  | 6170(7)    | 5437(3)    | 6749.1(16)  | 17.7(7)        |
| C23  | 7300(7)    | 5086(3)    | 6129.8(16)  | 18.9(7)        |
| C24  | 6199(7)    | 4248(3)    | 5810.9(16)  | 18.1(7)        |
| C25  | 7259(7)    | 3880(3)    | 5260.2(16)  | 19.1(7)        |
| C26  | 6305(7)    | 3098(3)    | 4945.4(17)  | 22.1(8)        |
| C27  | 4257(7)    | 2688(3)    | 5187.1(17)  | 22.8(8)        |

**Table S3** Fractional Atomic Coordinates ( $\times 10^4$ ) and Equivalent Isotropic Displacement Parameters ( $\text{\AA}^2 \times 10^3$ ) for **3ga**.  $U_{\text{eq}}$  is defined as 1/3 of the trace of the orthogonalised  $U_{\text{IJ}}$  tensor.

| <b>Atom</b> | <b><i>x</i></b> | <b><i>y</i></b> | <b><i>z</i></b> | <b>U(eq)</b> |
|-------------|-----------------|-----------------|-----------------|--------------|
| C28         | 3115(7)         | 3034(3)         | 5726.0(17)      | 21.8(8)      |
| C29         | 4099(7)         | 3815(3)         | 6037.4(17)      | 20.9(8)      |
| C30         | 6298(7)         | 4448(3)         | 7235.6(16)      | 17.9(7)      |
| C31         | 8765(8)         | 2799(3)         | 7675.3(18)      | 24.2(8)      |
| C32         | 11295(7)        | 2176(3)         | 7592(2)         | 27.0(8)      |

**Table S4** Anisotropic Displacement Parameters ( $\text{\AA}^2 \times 10^3$ ) for **3ga**. The Anisotropic displacement factor exponent takes the form:  $-2\pi^2[h^2a^*2U_{11}+2hka^*b^*U_{12}+\dots]$ .

| Atom | U <sub>11</sub> | U <sub>22</sub> | U <sub>33</sub> | U <sub>23</sub> | U <sub>13</sub> | U <sub>12</sub> |
|------|-----------------|-----------------|-----------------|-----------------|-----------------|-----------------|
| Br1  | 19.6(2)         | 20.5(2)         | 28.8(2)         | -8.79(15)       | 4.59(15)        | -0.95(15)       |
| Br2  | 36.2(3)         | 25.6(2)         | 25.7(2)         | -8.89(16)       | 0.36(17)        | -10.24(18)      |
| O1   | 28.8(15)        | 25.4(14)        | 20.2(13)        | -1.2(11)        | 3.7(11)         | 3.7(12)         |
| O2   | 19.8(13)        | 17.9(12)        | 18.5(12)        | -5.5(10)        | 3.0(10)         | 0.0(10)         |
| O3   | 39.5(17)        | 16.5(13)        | 22.7(13)        | -1.3(10)        | 1.0(12)         | -1.4(12)        |
| O4   | 41.4(17)        | 25.6(15)        | 22.1(14)        | -7.7(11)        | -4.0(12)        | -1.1(13)        |
| O5   | 22.5(14)        | 22.1(13)        | 22.7(13)        | -5.0(10)        | 6.5(10)         | -7.2(11)        |
| O6   | 19.5(13)        | 19.1(13)        | 21.8(13)        | 0.3(10)         | 4.0(10)         | -3.0(10)        |
| O7   | 25.1(14)        | 24.2(14)        | 24.3(13)        | -3.4(11)        | 10.2(11)        | -7.6(11)        |
| C1   | 22.2(18)        | 14.3(16)        | 19.5(17)        | -4.0(13)        | 1.6(14)         | -5.6(14)        |
| C2   | 17.9(17)        | 17.7(17)        | 19.8(17)        | -4.8(13)        | 2.8(13)         | -5.8(14)        |
| C3   | 18.8(17)        | 16.2(17)        | 19.9(17)        | -3.9(13)        | 0.9(13)         | -4.2(14)        |
| C4   | 16.0(17)        | 18.2(17)        | 21.1(17)        | -8.5(14)        | 5.3(13)         | -5.8(14)        |
| C5   | 16.7(17)        | 17.2(17)        | 20.5(17)        | -7.0(13)        | 1.2(13)         | -7.0(14)        |
| C6   | 18.8(18)        | 22.5(18)        | 19.2(17)        | -4.5(14)        | 7.3(14)         | -3.6(15)        |
| C7   | 17.9(18)        | 24.5(19)        | 22.8(18)        | -8.3(15)        | 1.2(14)         | -1.4(15)        |
| C8   | 25.5(19)        | 16.2(17)        | 19.3(17)        | -5.7(14)        | 0.4(14)         | -0.6(15)        |
| C9   | 19.0(18)        | 22.2(18)        | 21.6(18)        | -4.6(14)        | 5.6(14)         | -5.9(15)        |
| C10  | 13.7(17)        | 23.3(18)        | 24.4(18)        | -6.3(15)        | 3.2(13)         | -4.5(14)        |
| C11  | 29(2)           | 26(2)           | 23.1(19)        | 0.4(15)         | -1.0(15)        | -5.7(17)        |
| C12  | 19.4(18)        | 16.2(17)        | 18.2(17)        | -3.0(13)        | 4.3(13)         | -4.2(14)        |
| C13  | 25.4(19)        | 18.4(17)        | 18.1(17)        | -3.8(14)        | 3.5(14)         | -2.8(15)        |
| C14  | 14.6(17)        | 20.3(18)        | 23.5(18)        | -1.8(14)        | 0.4(13)         | -3.8(14)        |
| C15  | 21.3(18)        | 14.9(16)        | 23.2(18)        | -4.1(14)        | 5.5(14)         | -4.7(14)        |
| C16  | 25.2(19)        | 19.2(18)        | 18.3(17)        | -5.6(14)        | 2.2(14)         | -4.1(15)        |
| C17  | 21.5(18)        | 19.6(17)        | 18.1(17)        | -2.6(14)        | 3.8(14)         | -1.6(15)        |
| C18  | 21.2(18)        | 17.8(17)        | 21.7(18)        | -3.3(14)        | 5.7(14)         | -3.5(14)        |
| C19  | 48(3)           | 25(2)           | 24(2)           | 2.9(16)         | -0.8(18)        | 1.0(19)         |
| C20  | 50(3)           | 41(3)           | 34(2)           | -3(2)           | -9(2)           | 5(2)            |
| C20  | 50(3)           | 41(3)           | 34(2)           | -3(2)           | -9(2)           | 5(2)            |
| C21  | 17.1(17)        | 14.9(16)        | 22.1(17)        | -5.8(13)        | 4.4(13)         | -6.9(14)        |
| C22  | 18.0(17)        | 19.2(17)        | 17.2(16)        | -6.9(14)        | 1.6(13)         | -3.8(14)        |
| C23  | 20.9(18)        | 16.5(17)        | 18.2(17)        | -0.8(13)        | 2.9(14)         | -0.4(14)        |
| C24  | 19.0(17)        | 17.5(17)        | 17.4(17)        | -2.1(13)        | -0.7(13)        | -0.3(14)        |
| C25  | 16.2(17)        | 21.0(18)        | 20.0(17)        | -3.5(14)        | 1.5(13)         | -2.3(14)        |
| C26  | 25.6(19)        | 20.9(18)        | 19.2(17)        | -4.7(14)        | 1.6(14)         | 0.3(15)         |
| C27  | 27(2)           | 18.1(18)        | 22.9(18)        | -3.9(14)        | -2.9(15)        | -1.2(15)        |

**Table S4** Anisotropic Displacement Parameters ( $\text{\AA}^2 \times 10^3$ ) for **3ga**. The Anisotropic displacement factor exponent takes the form:  $-2\pi^2[h^2a^2U_{11}+2hka*b*U_{12}+\dots]$ .

| <b>Atom</b> | <b>U<sub>11</sub></b> | <b>U<sub>22</sub></b> | <b>U<sub>33</sub></b> | <b>U<sub>23</sub></b> | <b>U<sub>13</sub></b> | <b>U<sub>12</sub></b> |
|-------------|-----------------------|-----------------------|-----------------------|-----------------------|-----------------------|-----------------------|
| C28         | 22.0(19)              | 20.8(18)              | 23.5(18)              | -2.0(14)              | 0.6(14)               | -5.8(15)              |
| C29         | 21.9(19)              | 22.1(18)              | 18.0(17)              | -3.2(14)              | 4.0(14)               | -0.8(15)              |
| C30         | 19.6(18)              | 16.5(17)              | 19.7(17)              | -6.7(13)              | 0.0(14)               | -6.5(14)              |
| C31         | 28(2)                 | 18.5(18)              | 25.3(19)              | 2.8(15)               | 2.1(15)               | -5.2(16)              |
| C32         | 22(2)                 | 21.8(19)              | 38(2)                 | 0.6(16)               | -2.9(16)              | -6.7(16)              |

**Table S5** Bond Lengths for **3ga**.

| Atom | Atom | Length/Å | Atom | Atom | Length/Å |
|------|------|----------|------|------|----------|
| Br1  | C15  | 1.900(4) | C6   | C7   | 1.382(5) |
| Br2  | C27  | 1.907(4) | C7   | C8   | 1.397(5) |
| O1   | C8   | 1.368(4) | C8   | C9   | 1.396(5) |
| O1   | C11  | 1.431(5) | C9   | C10  | 1.380(5) |
| O2   | C3   | 1.359(4) | C12  | C13  | 1.402(5) |
| O2   | C4   | 1.388(4) | C12  | C17  | 1.392(5) |
| O3   | C18  | 1.344(4) | C13  | C14  | 1.388(5) |
| O3   | C19  | 1.459(5) | C14  | C15  | 1.388(5) |
| O4   | C18  | 1.196(5) | C15  | C16  | 1.381(5) |
| O5   | C23  | 1.212(5) | C16  | C17  | 1.386(5) |
| O6   | C30  | 1.346(4) | C19  | C20  | 1.507(7) |
| O6   | C31  | 1.459(4) | C21  | C22  | 1.543(5) |
| O7   | C30  | 1.205(4) | C22  | C23  | 1.535(5) |
| C1   | C2   | 1.441(5) | C22  | C30  | 1.507(5) |
| C1   | C3   | 1.362(5) | C23  | C24  | 1.483(5) |
| C1   | C18  | 1.482(5) | C24  | C25  | 1.398(5) |
| C2   | C4   | 1.366(5) | C24  | C29  | 1.408(5) |
| C2   | C21  | 1.507(5) | C25  | C26  | 1.385(5) |
| C3   | C12  | 1.469(5) | C26  | C27  | 1.380(6) |
| C4   | C5   | 1.455(5) | C27  | C28  | 1.385(5) |
| C5   | C6   | 1.400(5) | C28  | C29  | 1.388(5) |
| C5   | C10  | 1.392(5) | C31  | C32  | 1.505(5) |

**Table S6** Bond Angles for **3ga**.

| Atom Atom Atom | Angle/°  | Atom Atom Atom | Angle/°  |
|----------------|----------|----------------|----------|
| C8 O1 C11      | 117.2(3) | C14 C15 Br1    | 119.6(3) |
| C3 O2 C4       | 107.8(3) | C16 C15 Br1    | 119.0(3) |
| C18 O3 C19     | 116.2(3) | C16 C15 C14    | 121.4(3) |
| C30 O6 C31     | 115.1(3) | C15 C16 C17    | 119.4(3) |
| C2 C1 C18      | 124.6(3) | C16 C17 C12    | 120.7(4) |
| C3 C1 C2       | 107.5(3) | O3 C18 C1      | 111.8(3) |
| C3 C1 C18      | 127.8(3) | O4 C18 O3      | 124.4(3) |
| C1 C2 C21      | 125.3(3) | O4 C18 C1      | 123.7(3) |
| C4 C2 C1       | 105.7(3) | O3 C19 C20     | 110.7(4) |
| C4 C2 C21      | 129.0(3) | C2 C21 C22     | 112.0(3) |
| O2 C3 C1       | 109.5(3) | C23 C22 C21    | 111.4(3) |
| O2 C3 C12      | 115.4(3) | C30 C22 C21    | 110.1(3) |
| C1 C3 C12      | 135.2(3) | C30 C22 C23    | 111.3(3) |
| O2 C4 C5       | 113.7(3) | O5 C23 C22     | 120.3(3) |
| C2 C4 O2       | 109.5(3) | O5 C23 C24     | 121.5(3) |
| C2 C4 C5       | 136.4(3) | C24 C23 C22    | 118.1(3) |
| C6 C5 C4       | 123.0(3) | C25 C24 C23    | 119.1(3) |
| C10 C5 C4      | 119.4(3) | C25 C24 C29    | 118.3(3) |
| C10 C5 C6      | 117.7(3) | C29 C24 C23    | 122.5(3) |
| C7 C6 C5       | 120.9(3) | C26 C25 C24    | 121.4(4) |
| C6 C7 C8       | 120.2(3) | C27 C26 C25    | 118.3(3) |
| O1 C8 C7       | 115.9(3) | C26 C27 Br2    | 119.0(3) |
| O1 C8 C9       | 124.4(3) | C26 C27 C28    | 122.7(4) |
| C9 C8 C7       | 119.7(3) | C28 C27 Br2    | 118.3(3) |
| C10 C9 C8      | 118.9(3) | C27 C28 C29    | 118.3(4) |
| C9 C10 C5      | 122.5(3) | C28 C29 C24    | 121.0(3) |
| C13 C12 C3     | 120.9(3) | O6 C30 C22     | 111.1(3) |
| C17 C12 C3     | 120.1(3) | O7 C30 O6      | 124.0(3) |
| C17 C12 C13    | 119.0(3) | O7 C30 C22     | 124.9(3) |
| C14 C13 C12    | 120.7(3) | O6 C31 C32     | 107.2(3) |
| C15 C14 C13    | 118.9(3) |                |          |



**Table S7** Torsion Angles for **3ga**.

| A   | B   | C   | D   | Angle/°   | A   | B   | C   | D   | Angle/°   |
|-----|-----|-----|-----|-----------|-----|-----|-----|-----|-----------|
| Br1 | C15 | C16 | C17 | -179.9(3) | C10 | C5  | C6  | C7  | 0.2(5)    |
| Br2 | C27 | C28 | C29 | -179.6(3) | C11 | O1  | C8  | C7  | -175.7(3) |
| O1  | C8  | C9  | C10 | 178.4(3)  | C11 | O1  | C8  | C9  | 4.9(5)    |
| O2  | C3  | C12 | C13 | -144.4(3) | C12 | C13 | C14 | C15 | -0.3(5)   |
| O2  | C3  | C12 | C17 | 35.1(5)   | C13 | C12 | C17 | C16 | -1.6(5)   |
| O2  | C4  | C5  | C6  | -150.2(3) | C13 | C14 | C15 | Br1 | 179.6(3)  |
| O2  | C4  | C5  | C10 | 31.5(5)   | C13 | C14 | C15 | C16 | -0.3(6)   |
| O5  | C23 | C24 | C25 | 2.6(5)    | C14 | C15 | C16 | C17 | 0.0(6)    |
| O5  | C23 | C24 | C29 | -176.7(3) | C15 | C16 | C17 | C12 | 1.0(6)    |
| C1  | C2  | C4  | O2  | -0.3(4)   | C17 | C12 | C13 | C14 | 1.3(5)    |
| C1  | C2  | C4  | C5  | 172.1(4)  | C18 | O3  | C19 | C20 | 94.6(4)   |
| C1  | C2  | C21 | C22 | -87.2(4)  | C18 | C1  | C2  | C4  | -177.2(3) |
| C1  | C3  | C12 | C13 | 37.4(6)   | C18 | C1  | C2  | C21 | 3.9(6)    |
| C1  | C3  | C12 | C17 | -143.0(4) | C18 | C1  | C3  | O2  | 177.3(3)  |
| C2  | C1  | C3  | O2  | 0.3(4)    | C18 | C1  | C3  | C12 | -4.4(7)   |
| C2  | C1  | C3  | C12 | 178.5(4)  | C19 | O3  | C18 | O4  | 2.0(6)    |
| C2  | C1  | C18 | O3  | -135.6(4) | C19 | O3  | C18 | C1  | 179.9(3)  |
| C2  | C1  | C18 | O4  | 42.3(6)   | C21 | C2  | C4  | O2  | 178.6(3)  |
| C2  | C4  | C5  | C6  | 37.6(7)   | C21 | C2  | C4  | C5  | -9.0(7)   |
| C2  | C4  | C5  | C10 | -140.6(4) | C21 | C22 | C23 | O5  | 4.0(5)    |
| C2  | C21 | C22 | C23 | 168.7(3)  | C21 | C22 | C23 | C24 | -176.1(3) |
| C2  | C21 | C22 | C30 | -67.3(4)  | C21 | C22 | C30 | O6  | -82.7(3)  |
| C3  | O2  | C4  | C2  | 0.4(4)    | C21 | C22 | C30 | O7  | 95.8(4)   |
| C3  | O2  | C4  | C5  | -173.8(3) | C22 | C23 | C24 | C25 | -177.3(3) |
| C3  | C1  | C2  | C4  | 0.0(4)    | C22 | C23 | C24 | C29 | 3.5(5)    |
| C3  | C1  | C2  | C21 | -179.0(3) | C23 | C22 | C30 | O6  | 41.3(4)   |
| C3  | C1  | C18 | O3  | 47.8(5)   | C23 | C22 | C30 | O7  | -140.1(4) |
| C3  | C1  | C18 | O4  | -134.3(4) | C23 | C24 | C25 | C26 | 179.9(3)  |
| C3  | C12 | C13 | C14 | -179.2(3) | C23 | C24 | C29 | C28 | 179.8(3)  |
| C3  | C12 | C17 | C16 | 178.8(3)  | C24 | C25 | C26 | C27 | 0.3(5)    |
| C4  | O2  | C3  | C1  | -0.4(4)   | C25 | C24 | C29 | C28 | 0.6(5)    |
| C4  | O2  | C3  | C12 | -179.1(3) | C25 | C26 | C27 | Br2 | 179.3(3)  |
| C4  | C2  | C21 | C22 | 94.1(5)   | C25 | C26 | C27 | C28 | 0.6(6)    |
| C4  | C5  | C6  | C7  | -178.0(3) | C26 | C27 | C28 | C29 | -0.8(6)   |
| C4  | C5  | C10 | C9  | 177.7(3)  | C27 | C28 | C29 | C24 | 0.2(6)    |
| C5  | C6  | C7  | C8  | -0.2(6)   | C29 | C24 | C25 | C26 | -0.9(5)   |
| C6  | C5  | C10 | C9  | -0.7(5)   | C30 | O6  | C31 | C32 | -178.8(3) |
| C6  | C7  | C8  | O1  | -178.9(3) | C30 | C22 | C23 | O5  | -119.3(4) |

**Table S7** Torsion Angles for **3ga**.

| <b>A</b> | <b>B</b> | <b>C</b> | <b>D</b> | <b>Angle/°</b> | <b>A</b> | <b>B</b> | <b>C</b> | <b>D</b> | <b>Angle/°</b> |
|----------|----------|----------|----------|----------------|----------|----------|----------|----------|----------------|
| C6       | C7       | C8       | C9       | 0.5(6)         | C30      | C22      | C23      | C24      | 60.6(4)        |
| C7       | C8       | C9       | C10      | -0.9(6)        | C31      | O6       | C30      | O7       | 1.1(5)         |
| C8       | C9       | C10      | C5       | 1.0(6)         | C31      | O6       | C30      | C22      | 179.7(3)       |

**Table S8** Hydrogen Atom Coordinates ( $\text{\AA}\times 10^4$ ) and Isotropic Displacement Parameters ( $\text{\AA}^2\times 10^3$ ) for **3ga**.

| Atom | <i>x</i> | <i>y</i> | <i>z</i> | U(eq) |
|------|----------|----------|----------|-------|
| H6   | 10910.45 | 5525.22  | 8045.96  | 24    |
| H7   | 13022.5  | 4079.5   | 8688.24  | 26    |
| H9   | 7239.06  | 4144.63  | 9849.87  | 25    |
| H10  | 5187.61  | 5601.21  | 9206.96  | 24    |
| H11A | 9254.8   | 2324.39  | 10107.61 | 39    |
| H11B | 10178.48 | 3181.81  | 10515.89 | 39    |
| H11C | 11814.68 | 2030.77  | 10435.69 | 39    |
| H13  | -1179.31 | 8892.14  | 7661.49  | 25    |
| H14  | -4056.21 | 10224.37 | 8071.35  | 23    |
| H16  | 585.8    | 10431.43 | 9463.63  | 25    |
| H17  | 3438.32  | 9088.62  | 9059.65  | 24    |
| H19A | 1989.6   | 9628.71  | 5925.23  | 40    |
| H19B | 2287.78  | 10767.41 | 6186.78  | 40    |
| H20A | -1795.76 | 10789.49 | 5947.73  | 64    |
| H20B | -1551.97 | 10791.13 | 6672.21  | 64    |
| H20C | -1854.3  | 9679.67  | 6383.33  | 64    |
| H21A | 9060.32  | 6055.69  | 7131.32  | 21    |
| H21B | 7538.67  | 6948.4   | 6656.55  | 21    |
| H22  | 4442.7   | 5735.98  | 6673.33  | 21    |
| H25  | 8633.8   | 4167.05  | 5101.86  | 23    |
| H26  | 7026.18  | 2855.42  | 4580.31  | 27    |
| H28  | 1723.99  | 2750.03  | 5875.44  | 26    |
| H29  | 3360.71  | 4055.29  | 6400.98  | 25    |
| H31A | 7548.76  | 2322.56  | 7608.96  | 29    |
| H31B | 8573.54  | 3029.87  | 8094.41  | 29    |
| H32A | 11496.24 | 1993.8   | 7168.04  | 40    |
| H32B | 11518.04 | 1497.58  | 7868.08  | 40    |
| H32C | 12483.09 | 2637.87  | 7685.51  | 40    |

## 9. Study on Antitumor Activity

**MTT assay.** The 180  $\mu\text{L}$  cell suspensions (4500-5000 cells/mL) was seeded in 96-well plates and incubated for 24 h. All compounds and 5-FU were dissolved in the Phosphate Buffered Saline (PBS) with 1% DMSO to give various concentrations (2.5, 5, 10, 20, and 40  $\mu\text{M}$ , respectively) to 96-well plates and control wells contained supplemented media with 1% DMSO. Continue incubating for 48 h at 37  $^{\circ}\text{C}$  in 5%  $\text{CO}_2$  atmosphere and then the MTT solution (10  $\mu\text{L}$ , 5 mg/mL) was added into each well and the cultures were incubated further for 4-6 h. After removal of the supernatant, DMSO (100  $\mu\text{L}$ ) was added to dissolve the formazan crystals. The absorbance was read by enzyme labeling instrument with 570/630 nm double wavelength measurement. The cytotoxicity was estimated based on the percentage cell survival in a dose dependent manner relative to the negative control. The final  $\text{IC}_{50}$  (a drug concentration killing 50% cells) values were calculated by the Bliss method. All the tests were repeated in at least three independent experiments.

**Table S9** The IC<sub>50</sub> (μM) values of tested compounds on four tumor cell lines and one normal liver cell line.

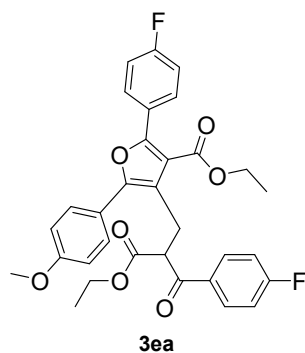

| Compounds  | T-24             | MGC-803           | HeLa             | HePG-2            | WI-38             |
|------------|------------------|-------------------|------------------|-------------------|-------------------|
| 3aa        | 38.1 ± 1.2       | >40               | 32.0 ± 1.3       | >40               | >40               |
| 3ba        | 30.7 ± 0.9       | 38.5 ± 2.0        | 29.3 ± 0.9       | >40               | >40               |
| 3da        | >40              | >40               | >40              | >40               | >40               |
| <b>3ea</b> | <b>6.3 ± 0.7</b> | <b>12.6 ± 0.9</b> | <b>7.4 ± 0.5</b> | <b>20.2 ± 1.3</b> | <b>33.6 ± 0.4</b> |
| 3fa        | 27.1 ± 1.0       | 35.6 ± 1.6        | 30.9 ± 1.2       | >40±              | >40               |
| 3ga        | 25.8 ± 1.5       | 30.6 ± 1.4        | 31.6 ± 0.8       | >40               | >40               |
| 3ha        | 22.5 ± 0.4       | 30.5 ± 0.7        | 27.2 ± 1.6       | 35.8 ± 0.9        | >40               |
| 3ia        | 28.9 ± 0.8       | 35.4 ± 0.9        | 33.0 ± 0.5       | >40               | >40               |
| 3ja        | 20.4 ± 1.1       | 31.6 ± 1.2        | 22.1 ± 1.0       | 36.2 ± 1.5        | 38.9 ± 0.7        |
| 3ka        | 32.5 ± 0.7       | >40               | 34.3 ± 0.9       | >40               | >40               |
| 3ma        | 30.4 ± 1.3       | >40               | 33.1 ± 0.5       | >40               | >40               |
| 3na        | 37.5 ± 1.5       | >40               | 30.8 ± 1.3       | >40               | >40               |
| 3oa        | 33.4 ± 0.8       | 39.6 ± 0.9        | 29.5 ± 2.1       | >40               | >40               |
| 3pa        | >40              | >40               | 36.2 ± 1.8       | >40               | >40               |
| 3qa        | >40              | >40               | 35.3 ± 0.8       | >40               | >40               |
| 3ra        | 30.1 ± 0.5       | 38.1 ± 1.0        | 29.6 ± 1.4       | 37.6 ± 1.6        | >40               |
| 3sa        | >40              | >40               | 37.2 ± 0.9       | >40               | >40               |
| 3ta        | 28.0 ± 0.8       | 31.9 ± 0.8        | 25.4 ± 1.2       | >40               | >40               |
| 3ab        | 30.5 ± 0.9       | >40               | >40              | >40               | >40               |
| 3ad        | 27.3 ± 1.1       | 35.1 ± 1.4        | 30.7 ± 0.6       | 38.5 ± 0.5        | >40               |
| 3ae        | 34.6 ± 0.4       | 38.9 ± 1.1        | 33.1 ± 1.2       | >40               | >40               |
| 3af        | >40              | >40               | >40              | >40               | >40               |
| 3ag        | 38.6 ± 0.7       | >40               | 35.1 ± 0.9       | >40               | >40               |
| 3ah        | 29.1             | 36.9 ± 0.9        | 25.4 ± 1.5       | >40               | >40               |
| 3ai        | >40              | >40               | >40              | >40               | >40               |
| 3aj        | 33.1 ± 1.2       | >40               | 35.7 ± 0.7       | >40               | >40               |
| 5-FU       | 30.5 ± 0.9       | 38.7 ± 0.8        | >40              | >40               | >40               |

## 10. Characterization Data for the Electrolysis Products

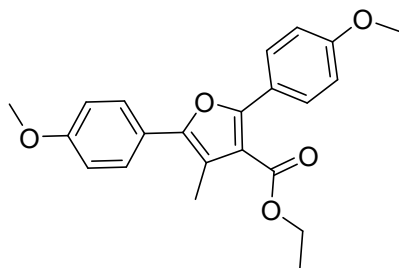

**ethyl 2,5-bis(4-methoxyphenyl)-4-methylfuran-3-carboxylate (10).** yellow liquid (69.2 mg, 63%).  $^1\text{H NMR}$  (600 MHz, Chloroform-*d*)  $\delta$  7.79 (d,  $J$  = 8.9 Hz, 2H), 7.58 (d,  $J$  = 8.8 Hz, 2H), 6.96 (dd,  $J$  = 17.5, 8.8 Hz, 4H), 4.32 (q,  $J$  = 7.1 Hz, 2H), 3.85 (d,  $J$  = 2.6 Hz, 6H), 2.39 (s, 3H), 1.32 (t,  $J$  = 7.1 Hz, 3H).  $^{13}\text{C NMR}$  (150 MHz, Chloroform-*d*)  $\delta$  164.84, 160.06, 158.97, 155.46, 148.48, 129.84, 127.81, 123.61, 123.05, 116.56, 114.97, 114.00, 113.38, 60.31, 55.31, 55.30, 14.16, 11.06. IR (KBr)  $\nu$ : 3061, 2925, 1721, 1604, 1253, 1030  $\text{cm}^{-1}$ . HRMS ( $m/z$ ) [ESI]: calculated for  $\text{C}_{22}\text{H}_{23}\text{O}_5^+$   $[\text{M}+\text{H}]^+$ : 367.1540, found 367.1542.

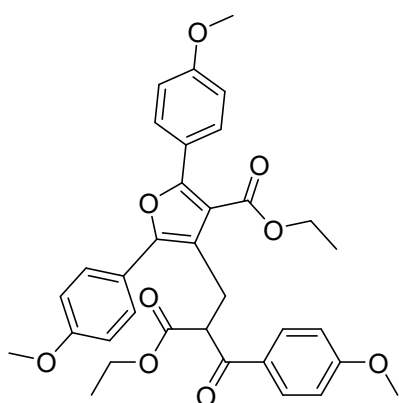

**ethyl 4-(3-ethoxy-2-(4-methoxybenzoyl)-3-oxopropyl)-2,5-bis(4-methoxyphenyl)furan-3-carboxylate (3aa).** yellow liquid (73.9 mg, 84%).  $^1\text{H NMR}$  (600 MHz, Chloroform-*d*)  $\delta$  7.87 (d,  $J$  = 6.0 Hz, 2H), 7.72 (d,  $J$  = 12.0 Hz, 2H), 7.55 (d,  $J$  = 6.0 Hz, 2H), 6.93 (d,  $J$  = 6.0 Hz, 4H), 6.85 (d,  $J$  = 6.0 Hz, 2H), 4.84-4.81 (m, 1H), 4.31-4.25 (m, 2H), 4.00-3.95 (m, 1H), 3.88-3.85 (m, 1H), 3.84 (s, 3H), 3.83 (s, 3H), 3.82 (s, 3H), 3.64 (dd,  $J$  = 18.0, 12.0 Hz, 1H), 3.52 (dd,  $J$  = 18.0, 12.0 Hz, 1H), 1.24 (t,  $J$  = 6.0 Hz, 3H), 0.98 (t,  $J$  = 6.0 Hz, 3H).  $^{13}\text{C NMR}$  (150 MHz, Chloroform-*d*)  $\delta$  193.52, 169.77, 164.41, 163.65, 160.18, 159.32, 156.51, 149.77, 130.91, 130.07, 129.33, 128.39, 122.87, 122.78, 117.17, 113.95, 113.83, 113.62, 113.27, 61.17, 60.47, 55.38, 55.26, 55.23, 53.78, 24.13, 13.98, 13.72. IR (KBr)  $\nu$ : 3080, 2938, 1708, 1600, 1254, 1028  $\text{cm}^{-1}$ . HRMS ( $m/z$ ) [ESI]: calculated for  $\text{C}_{34}\text{H}_{35}\text{O}_9^+$   $[\text{M}+\text{H}]^+$ : 587.2276, found 587.2277.

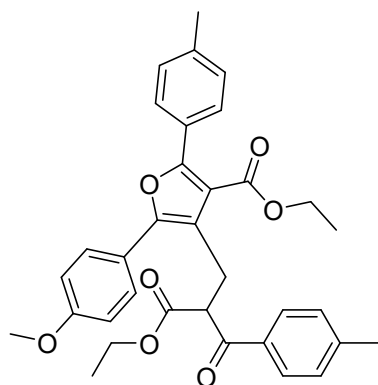

**ethyl 4-(3-ethoxy-2-(4-methylbenzoyl)-3-oxopropyl)-5-(4-methoxyphenyl)-2-(*p*-tolyl)furan-3-carboxylate (3ba).** yellow solid (68.1 mg, 82%). mp: 100-103 °C.  $^1\text{H NMR}$  (600 MHz, Chloroform-*d*)  $\delta$  7.80 (d,  $J = 6.0$  Hz, 2H), 7.65 (d,  $J = 6.0$  Hz, 2H), 7.58 (d,  $J = 6.0$  Hz, 2H), 7.23 -7.18 (m, 4H), 6.95 (d,  $J = 12.0$  Hz, 2H), 4.88 (t,  $J = 6.0$  Hz, 1H), 4.32-4.26 (m, 2H), 4.00-3.95 (m, 1H), 3.88-3.84 (m, 1H), 3.83 (s, 3H), 3.65 (dd,  $J = 14.5, 6.0$  Hz, 1H), 3.55 (dd,  $J = 14.5, 6.0$  Hz, 1H), 2.40 (s, 3H), 2.37 (s, 3H), 1.25 (t,  $J = 6.0$  Hz, 3H), 0.99 (t,  $J = 6.0$  Hz, 3H).  $^{13}\text{C NMR}$  (150 MHz, Chloroform-*d*)  $\delta$  194.68, 169.65, 164.34, 159.34, 156.43, 149.99, 144.17, 139.09, 133.80, 129.13, 128.62, 128.54, 128.40, 128.35, 127.30, 122.80, 117.14, 114.42, 113.94, 61.16, 60.48, 55.19, 53.85, 24.00, 21.54, 21.34, 13.92, 13.68. IR (KBr)  $\nu$ : 3046, 2981, 1710, 1508, 1228, 1037  $\text{cm}^{-1}$ . HRMS (m/z) [ESI]: calculated for  $\text{C}_{34}\text{H}_{35}\text{O}_7^+$  [M+H] $^+$ : 555.2377, found 555.2384.

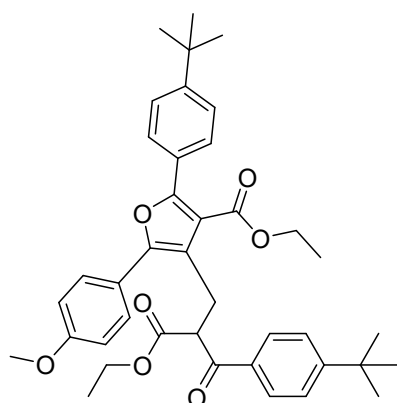

**ethyl 4-(2-(4-(*tert*-butyl)benzoyl)-3-ethoxy-3-oxopropyl)-2-(4-(*tert*-butyl)phenyl)-5-(4-methoxyphenyl)furan-3-carboxylate (3ca).** yellow liquid (67.0 mg, 70%).  $^1\text{H NMR}$  (600 MHz, Chloroform-*d*)  $\delta$  7.81 (d,  $J = 12.0$  Hz, 2H), 7.69 (d,  $J = 12.0$  Hz, 2H), 7.56 (d,  $J = 12.0$  Hz, 2H), 7.43-7.38 (m, 4H), 6.95-6.93 (m, 2H), 4.87 (t,  $J = 6.0$  Hz, 1H), 4.34-4.25 (m, 2H), 4.01-3.96 (m, 1H), 3.90-3.86 (m, 1H), 3.84 (s, 3H), 3.64 (dd,  $J = 14.5, 8.0$  Hz, 1H), 3.54 (dd,  $J = 14.5, 7.0$  Hz, 1H), 1.35 (s, 9H), 1.29 (s, 9H), 1.25 (t,  $J = 7.1$  Hz, 3H), 1.00 (t,  $J = 7.1$  Hz, 3H).  $^{13}\text{C NMR}$  (150 MHz, Chloroform-*d*)  $\delta$  194.81, 169.72, 164.42, 159.38, 157.06, 156.45, 152.25, 150.07, 133.78, 128.51, 128.40, 128.25, 127.32, 125.44, 124.85, 122.89, 117.14, 114.57, 114.01, 61.22, 60.56, 55.28, 53.82, 35.06, 34.75, 31.19, 30.97, 24.14, 14.00, 13.77. IR (KBr)  $\nu$ : 3061, 2903, 1732, 1508, 1253, 1038  $\text{cm}^{-1}$ . HRMS (m/z) [ESI]: calculated for  $\text{C}_{40}\text{H}_{47}\text{O}_7^+$  [M+H] $^+$ : 639.3316, found 639.3317.

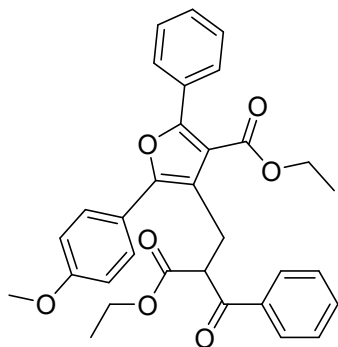

**ethyl 4-(2-benzoyl-3-ethoxy-3-oxopropyl)-5-(4-methoxyphenyl)-2-phenylfuran-3-carboxylate (3da).** yellow solid (63.9 mg, 81%). mp: 64-67 °C.  $^1\text{H NMR}$  (600 MHz, Chloroform-*d*)  $\delta$  7.88 (d,  $J$  = 6.0 Hz, 2H), 7.73 (d,  $J$  = 12.0 Hz, 2H), 7.57 (d,  $J$  = 6.0 Hz, 2H), 7.52 (t,  $J$  = 6.0 Hz, 1H), 7.42-7.37 (m, 5H), 6.95 (d,  $J$  = 6.0 Hz, 2H), 4.90 (t,  $J$  = 6.0 Hz, 1H), 4.31-4.25 (m, 2H), 4.00-3.95 (m, 1H), 3.88-3.85 (m, 1H), 3.84 (s, 3H), 3.64 (dd,  $J$  = 12.0, 6.0 Hz, 1H), 3.55 (dd,  $J$  = 12.0, 6.0 Hz, 1H), 1.23 (t,  $J$  = 6.0 Hz, 3H), 0.98 (t,  $J$  = 6.0 Hz, 3H).  $^{13}\text{C NMR}$  (150 MHz, Chloroform-*d*)  $\delta$  195.20, 169.56, 164.35, 159.48, 156.17, 150.40, 136.34, 133.33, 130.18, 129.05, 128.55, 128.54, 128.50, 128.44, 127.89, 122.75, 117.20, 114.96, 114.04, 61.29, 60.63, 55.29, 53.97, 24.00, 13.93, 13.72. IR (KBr)  $\nu$ : 3064, 2926, 1734, 1509, 1255, 1027  $\text{cm}^{-1}$ . **HRMS** ( $m/z$ ) [ESI]: calculated for  $\text{C}_{32}\text{H}_{30}\text{O}_7+\text{Na}^+$  [ $\text{M}+\text{Na}$ ] $^+$ : 549.1884, found 549.1884.

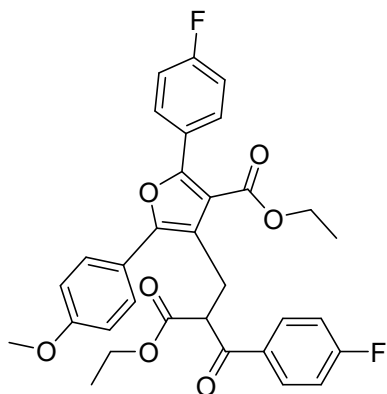

**ethyl 4-(3-ethoxy-2-(4-fluorobenzoyl)-3-oxopropyl)-2-(4-fluorophenyl)-5-(4-methoxyphenyl)furan-3-carboxylate (3ea).** yellow solid (63.3 mg, 75%). mp: 49-52 °C.  $^1\text{H NMR}$  (400 MHz, Chloroform-*d*)  $\delta$  7.93-7.90 (m, 2H), 7.76-7.72 (m, 2H), 7.55 (d,  $J$  = 8.0 Hz, 2H), 7.12-7.04 (m, 4H), 6.94 (d,  $J$  = 8.0 Hz, 2H), 4.84 (t,  $J$  = 8.0 Hz, 1H), 4.30-4.24 (m, 2H), 4.01-3.94 (m, 1H), 3.88-3.84 (m, 1H), 3.83 (s, 3H), 3.64 (dd,  $J$  = 16.0, 8.0 Hz, 1H), 3.54 (dd,  $J$  = 16.0, 8.0 Hz, 1H), 1.23 (t,  $J$  = 8.0 Hz, 3H), 0.98 (t,  $J$  = 8.0 Hz, 3H).  $^{13}\text{C NMR}$  (100 MHz, Chloroform-*d*)  $\delta$  193.44, 169.34, 167.08, 164.42 (d,  $J$  = 24.0 Hz), 164.13, 161.82, 159.55, 152.91 (d,  $J$  = 494.0 Hz), 132.68 (d,  $J$  = 3.0 Hz), 131.20 (d,  $J$  = 10.0 Hz), 130.59 (d,  $J$  = 8.0 Hz), 128.43, 126.31 (d,  $J$  = 3.0 Hz), 122.51, 117.08, 115.61 (d,  $J$  = 22.0 Hz), 114.97 (d,  $J$  = 21.0 Hz), 114.71, 114.04, 61.35, 60.65, 55.22, 54.02, 23.93, 13.90, 13.67.  $^{19}\text{F NMR}$  (565 MHz, Chloroform-*d*)  $\delta$  -104.45, -111.25. IR (KBr)  $\nu$ : 3080, 2925, 1732, 1599, 1234, 1033  $\text{cm}^{-1}$ . **HRMS** ( $m/z$ ) [ESI]: calculated for  $\text{C}_{32}\text{H}_{29}\text{F}_2\text{O}_7^+$  [ $\text{M}+\text{H}$ ] $^+$ : 563.1876, found 563.1875.



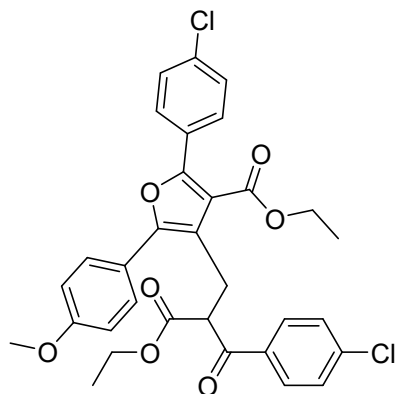

**ethyl 4-(2-(4-chlorobenzoyl)-3-ethoxy-3-oxopropyl)-2-(4-chlorophenyl)-5-(4-methoxyphenyl)furan-3-carboxylate (3fa).** yellow solid (68.6 mg, 77%). mp: 96-100 °C.  $^1\text{H NMR}$  (600 MHz, Chloroform-*d*)  $\delta$  7.81 (d,  $J = 12.0$  Hz, 2H), 7.69 (d,  $J = 12.0$  Hz, 2H), 7.54 (d,  $J = 12.0$  Hz, 2H), 7.39-7.35 (m, 4H), 6.94 (d,  $J = 6.0$  Hz, 2H), 4.82 (t,  $J = 6.0$  Hz, 1H), 4.31-4.26 (m, 2H), 4.00-3.95 (m, 1H), 3.87-3.85 (m, 1H), 3.83 (s, 3H), 3.63 (dd,  $J = 14.5, 6.0$  Hz, 1H), 3.54 (dd,  $J = 14.5, 6.0$  Hz, 1H), 1.24 (t,  $J = 6.0$  Hz, 3H), 0.98 (t,  $J = 6.0$  Hz, 3H).  $^{13}\text{C NMR}$  (150 MHz, Chloroform-*d*)  $\delta$  193.84, 169.23, 164.04, 159.59, 154.94, 150.66, 139.83, 135.01, 134.52, 129.87, 129.78, 128.79, 128.47, 128.43, 128.13, 122.38, 117.16, 115.16, 114.04, 61.41, 60.75, 55.24, 54.04, 23.86, 13.93, 13.68. IR (KBr)  $\nu$ : 3077, 2980, 1720, 1506, 1229, 1035  $\text{cm}^{-1}$ . HRMS (m/z) [ESI]: calculated for  $\text{C}_{32}\text{H}_{29}\text{Cl}_2\text{O}_7^+$  [M+H] $^+$ : 595.1285, found 595.1283.

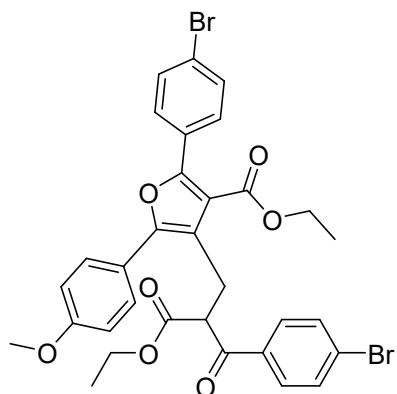

**ethyl 4-(2-(4-bromobenzoyl)-3-ethoxy-3-oxopropyl)-2-(4-bromophenyl)-5-(4-methoxyphenyl)furan-3-carboxylate (3ga).** yellow solid (75.9 mg, 74%). mp: 61-64 °C.  $^1\text{H NMR}$  (400 MHz, Chloroform-*d*)  $\delta$  7.72 (d,  $J = 8.0$  Hz, 2H), 7.62 (d,  $J = 8.0$  Hz, 2H), 7.53-7.51 (m, 6H), 6.94 (d,  $J = 8.0$  Hz, 2H), 4.81 (t,  $J = 8.0$  Hz, 1H), 4.32-4.25 (m, 2H), 4.02-3.94 (m, 1H), 3.89-3.86 (m, 1H), 3.84 (s, 3H), 3.62 (dd,  $J = 14.5, 8.0$  Hz, 1H), 3.54 (dd,  $J = 14.5, 8.0$  Hz, 1H), 1.25 (t,  $J = 8.0$  Hz, 3H), 0.98 (t,  $J = 8.0$  Hz, 3H).  $^{13}\text{C NMR}$  (100 MHz, Chloroform-*d*)  $\delta$  194.08, 169.20, 164.04, 159.62, 154.93, 150.72, 134.96, 131.79, 131.10, 130.00, 129.96, 128.92, 128.64, 128.44, 123.37, 122.38, 117.20, 115.25, 114.07, 61.43, 60.77, 55.26, 54.01, 23.86, 13.95, 13.70. IR (KBr)  $\nu$ : 3077, 2929, 1720, 1507, 1229, 1035  $\text{cm}^{-1}$ . HRMS (m/z) [ESI]: calculated for  $\text{C}_{32}\text{H}_{29}^{79}\text{Br}_2\text{O}_7^+$  [M+H] $^+$ : 705.0094, found 705.0105; calculated for  $\text{C}_{32}\text{H}_{29}^{81}\text{Br}_2\text{O}_7^+$  [M+H] $^+$ : 707.0074, found 707.0069.

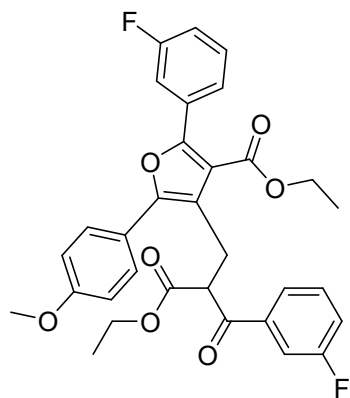

**ethyl 4-(3-ethoxy-2-(3-fluorobenzoyl)-3-oxopropyl)-2-(3-fluorophenyl)-5-(4-methoxyphenyl)furan-3-carboxylate (3ha).** yellow liquid (59.1 mg, 70%).  $^1\text{H NMR}$  (600 MHz, Chloroform-*d*)  $\delta$  7.71-7.68 (m, 1H), 7.56 (d,  $J = 6.0$  Hz, 2H), 7.54-7.52 (m, 1H), 7.47-7.43 (m, 1H), 7.41-7.37 (m, 1H), 7.21 (t,  $J = 7.9$  Hz, 1H), 7.16-7.11 (m, 2H), 7.05-7.02 (m, 1H), 6.94 (d,  $J = 6.0$  Hz, 2H), 4.91 (t,  $J = 7.7$  Hz, 1H), 4.25- 4.20 (m, 2H), 4.02-3.93 (m, 2H), 3.84 (s, 3H), 3.64-3.57 (m, 2H), 1.16 (t,  $J = 6.0$  Hz, 3H), 1.03 (t,  $J = 6.0$  Hz, 3H).  $^{13}\text{C NMR}$  (150 MHz, Chloroform-*d*)  $\delta$  193.89 (d,  $J = 3.1$  Hz), 169.48, 163.80, 162.08, 160.49 (d,  $J = 30.0$  Hz), 159.49, 158.92, 150.79 (d,  $J = 136.5$  Hz), 134.54 (d,  $J = 9.0$  Hz), 130.91 (d,  $J = 7.5$  Hz), 130.82 (d,  $J = 3.0$  Hz), 130.71 (d,  $J = 1.5$  Hz), 128.30, 125.51 (d,  $J = 12.0$  Hz), 124.32 (d,  $J = 3.0$  Hz), 123.66 (d,  $J = 3.0$  Hz), 122.64, 119.06 (d,  $J = 15.0$  Hz), 117.59, 116.80, 116.45 (d,  $J = 24.0$  Hz), 115.64 (d,  $J = 22.5$  Hz), 114.04, 61.19, 60.47, 57.04, 57.00, 55.27, 23.55, 13.73.  $^{19}\text{F NMR}$  (565 MHz, Chloroform-*d*)  $\delta$  -110.52, -111.83. IR (KBr)  $\nu$ : 3077, 2983, 1738, 1508, 1253, 1031  $\text{cm}^{-1}$ . HRMS ( $m/z$ ) [ESI]: calculated for  $\text{C}_{32}\text{H}_{29}\text{F}_2\text{O}_7^+$   $[\text{M}+\text{H}]^+$ : 563.1876, found 563.1883.

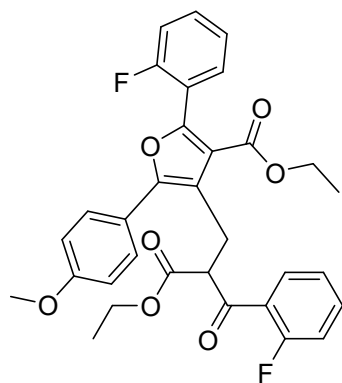

**ethyl 4-(3-ethoxy-2-(2-fluorobenzoyl)-3-oxopropyl)-2-(2-fluorophenyl)-5-(4-methoxyphenyl)furan-3-carboxylate (3ia).** yellow liquid (53.9 mg, 64%).  $^1\text{H NMR}$  (600 MHz, Chloroform-*d*)  $\delta$  7.65 (d,  $J = 6.0$  Hz, 1H), 7.56-7.53 (m, 4H), 7.49 (d,  $J = 6.0$  Hz, 1H), 7.39-7.35 (m, 2H), 7.24-7.21 (m, 1H), 7.10-7.07 (m, 1H), 6.96 (d,  $J = 12.0$  Hz, 2H), 4.84 (t,  $J = 6.0$  Hz, 1H), 4.34-4.29 (m, 2H), 4.01-3.96 (m, 1H), 3.90- 3.86 (m, 1H), 3.85 (s, 3H), 3.63 (dd,  $J = 18.0, 6.0$  Hz, 1H), 3.55 (dd,  $J = 18.0, 6.0$  Hz, 1H), 1.26 (t,  $J = 6.0$  Hz, 3H), 0.99 (t,  $J = 6.0$  Hz, 3H).  $^{13}\text{C NMR}$  (150 MHz, Chloroform-*d*)  $\delta$  193.92, 169.18, 164.07, 163.27 (d,  $J = 67.5$  Hz), 161.63 (d,  $J = 64.5$  Hz), 159.67, 154.37, 150.83, 138.32 (d,  $J = 6.0$  Hz), 131.94 (d,  $J = 7.5$  Hz), 130.17 (d,  $J = 7.5$  Hz), 129.46 (d,  $J = 7.5$  Hz), 128.48, 124.24 (d,  $J = 3.0$  Hz), 124.12 (d,  $J = 3.0$  Hz), 122.37, 120.41 (d,  $J = 22.5$  Hz), 117.23, 115.92 (d,  $J = 21.0$  Hz), 115.58 (d,  $J = 15.0$  Hz), 115.34 (d,  $J = 9.0$  Hz), 115.16, 114.11, 61.46, 60.87,

55.29, 54.08, 23.88, 13.87, 13.71.  $^{19}\text{F}$  NMR (565 MHz, Chloroform-*d*)  $\delta$  -111.61, -113.28. IR (KBr)  $\nu$ : 3077, 2983, 1716, 1508, 1251, 1043  $\text{cm}^{-1}$ . HRMS (m/z) [ESI]: calculated for  $\text{C}_{32}\text{H}_{28}\text{F}_2\text{O}_7+\text{Na}^+$  [M+Na] $^+$ : 585.1695, found 585.1701.

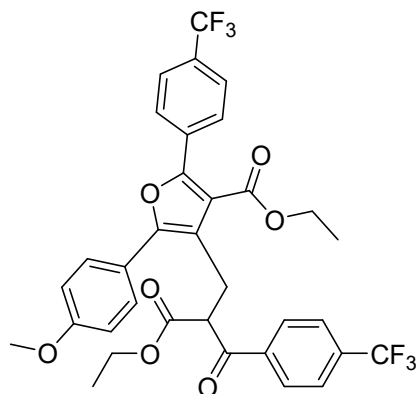

**ethyl 4-(3-ethoxy-3-oxo-2-(4-(trifluoromethyl)benzoyl)propyl)-5-(4-methoxyphenyl)-2-(4-(trifluoromethyl)phenyl)furan-3-carboxylate (3ja).** yellow solid (59.6 mg, 60%). mp: 51-53  $^{\circ}\text{C}$ .  $^1\text{H}$  NMR (600 MHz, Chloroform-*d*)  $\delta$  7.97 (d,  $J$  = 6.0 Hz, 2H), 7.85 (d,  $J$  = 12.0 Hz, 2H), 7.67-7.65 (m, 4H), 7.55 (d,  $J$  = 6.0 Hz, 2H), 6.96 (d,  $J$  = 12.0 Hz, 2H), 4.88 (t,  $J$  = 7.5 Hz, 1H), 4.33-4.28 (m, 2H), 4.01-3.96 (m, 1H), 3.89- 3.86 (m, 1H), 3.85 (s, 3H), 3.65 (dd,  $J$  = 14.6, 6.0 Hz, 1H), 3.59 (dd,  $J$  = 14.6, 6.0 Hz, 1H), 1.25 (t,  $J$  = 6.0 Hz, 3H), 0.99 (t,  $J$  = 6.0 Hz, 3H).  $^{13}\text{C}$  NMR (150 MHz, Chloroform-*d*)  $\delta$  194.22, 169.04, 163.96, 159.81, 154.22, 151.35, 138.90, 134.53 (d,  $J$  = 31.5 Hz), 133.30, 130.67 (d,  $J$  = 33.0 Hz), 128.74 (d,  $J$  = 13.5 Hz), 128.52, 125.58 (d,  $J$  = 3.0 Hz), 124.88 (d,  $J$  = 3.0 Hz), 124.33, 123.02, 122.52, 122.21, 117.26, 116.20, 114.16, 61.60, 60.97, 55.29, 54.30, 23.79, 13.93, 13.69.  $^{19}\text{F}$  NMR (565 MHz, Chloroform-*d*)  $\delta$  -62.75, -63.18. IR (KBr)  $\nu$ : 3077, 2985, 1735, 1504, 1254, 1068  $\text{cm}^{-1}$ . HRMS (m/z) [ESI]: calculated for  $\text{C}_{34}\text{H}_{28}\text{F}_6\text{O}_7+\text{Na}^+$  [M+Na] $^+$ : 685.1631, found 685.1636.

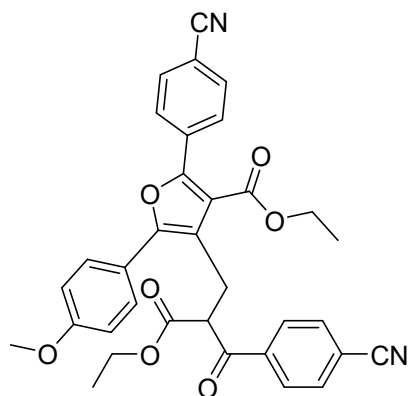

**ethyl 4-(2-(4-cyanobenzoyl)-3-ethoxy-3-oxopropyl)-2-(4-cyanophenyl)-5-(4-methoxyphenyl)furan-3-carboxylate (3ka).** yellow solid (50.2 mg, 58%). mp: 61-64  $^{\circ}\text{C}$ .  $^1\text{H}$  NMR (600 MHz, Chloroform-*d*)  $\delta$  7.94 (d,  $J$  = 12.0 Hz, 2H), 7.87 (d,  $J$  = 12.0 Hz, 2H), 7.70-7.68 (m, 4H), 7.54 (d,  $J$  = 6.0 Hz, 2H), 6.96 (d,  $J$  = 12.0 Hz, 2H), 4.82 (t,  $J$  = 6.0 Hz, 1H), 4.34-4.30 (m, 2H), 3.99-3.94 (m, 1H), 3.85 (s, 3H), 3.85-3.82 (m, 1H), 3.63 (dd,  $J$  = 14.6, 6.0 Hz, 1H), 3.57 (dd,  $J$  = 14.6, 6.0 Hz, 1H), 1.26 (t,  $J$  = 6.0 Hz, 3H), 0.96 (t,  $J$  = 6.0 Hz, 3H).  $^{13}\text{C}$  NMR (150 MHz, Chloroform-*d*)  $\delta$  193.67, 168.74, 163.80, 159.95, 153.24, 151.80, 139.07, 133.95, 132.38, 131.75, 128.82, 128.69, 128.55, 121.95, 118.56, 117.71, 117.48, 116.94, 116.58, 114.21, 112.23, 61.72, 61.16, 55.34, 54.37, 23.65, 13.94, 13.68. IR (KBr)  $\nu$ : 3074,

2982, 2228, 1716, 1603, 1254, 1025  $\text{cm}^{-1}$ . **HRMS** ( $m/z$ ) [ESI]: calculated for  $\text{C}_{34}\text{H}_{28}\text{N}_2\text{O}_7+\text{Na}^+$   $[\text{M}+\text{Na}]^+$ : 599.1789, found 599.1797.

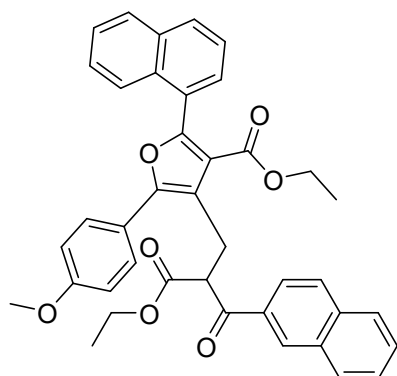

**ethyl 4-(2-(2-naphthoyl)-3-ethoxy-3-oxopropyl)-5-(4-methoxyphenyl)-2-(naphthalen-1-yl)furan-3-carboxylate (31a)**. yellow liquid (63.9 mg, 68%).  $^1\text{H NMR}$  (600 MHz, Chloroform-*d*)  $\delta$  8.41 (s, 1H), 8.13 (s, 1H), 7.94-7.89 (m, 2H), 7.85-7.81 (m, 5H), 7.73-7.71 (m, 1H), 7.60-7.56 (m, 3H), 7.53-7.50 (m, 3H), 6.94 (d,  $J = 12.0$  Hz, 2H), 5.10 (t,  $J = 7.5$  Hz, 1H), 4.35-4.29 (m, 2H), 4.05-3.99 (m, 1H), 3.95-3.89 (m, 1H), 3.83 (s, 3H), 3.72 (dd,  $J = 14.5, 7.9$  Hz, 1H), 3.65 (dd,  $J = 14.4, 7.3$  Hz, 1H), 1.23 (t,  $J = 7.1$  Hz, 3H), 1.02 (t,  $J = 7.1$  Hz, 3H).  $^{13}\text{C NMR}$  (150 MHz, Chloroform-*d*)  $\delta$  195.38, 169.76, 164.43, 159.52, 156.17, 150.68, 135.63, 133.76, 133.33, 132.70, 132.32, 130.66, 129.71, 128.65, 128.52, 128.38, 128.24, 127.70, 127.64, 127.48, 127.30, 126.78, 126.72, 126.32, 125.86, 124.05, 122.72, 117.47, 115.28, 114.06, 61.36, 60.70, 55.29, 53.97, 24.24, 14.04, 13.82. IR (KBr)  $\nu$ : 3068, 2925, 1734, 1571, 1250, 1090  $\text{cm}^{-1}$ . **HRMS** ( $m/z$ ) [ESI]: calculated for  $\text{C}_{40}\text{H}_{34}\text{O}_7+\text{Na}^+$   $[\text{M}+\text{Na}]^+$ : 649.2197, found 649.2197.

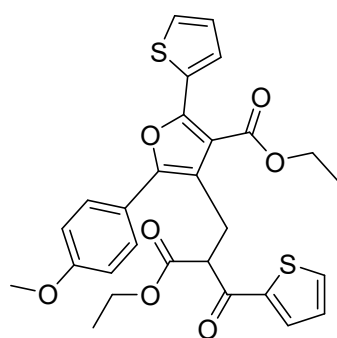

**ethyl 4-(3-ethoxy-3-oxo-2-(thiophene-2-carbonyl)propyl)-5-(4-methoxyphenyl)-2-(thiophen-2-yl)furan-3-carboxylate (3ma)**. red liquid (58.2 mg, 72%).  $^1\text{H NMR}$  (400 MHz, Chloroform-*d*)  $\delta$  7.87 (d,  $J = 4.0$  Hz, 1H), 7.67-7.56 (m, 4H), 7.41 (d,  $J = 4.0$  Hz, 1H), 7.11-7.03 (m, 2H), 6.95 (d,  $J = 8.0$  Hz, 2H), 4.66 (t,  $J = 8.0$  Hz, 1H), 4.42-4.35 (m, 2H), 4.04-3.96 (m, 1H), 3.92-3.86 (m, 1H), 3.84 (s, 3H), 3.67 (dd,  $J = 14.4, 8.0$  Hz, 1H), 3.55 (dd,  $J = 14.5, 8.0$  Hz, 1H), 1.34 (t,  $J = 8.0$  Hz, 3H), 1.01 (t,  $J = 8.0$  Hz, 3H).  $^{13}\text{C NMR}$  (100 MHz, Chloroform-*d*)  $\delta$  187.40, 169.13, 163.88, 159.57, 151.71, 149.85, 143.45, 134.76, 132.96, 131.70, 128.62, 128.54, 128.12, 127.79, 127.10, 122.38, 117.02, 114.04, 113.33, 61.42, 60.73, 55.30, 55.25, 24.06, 14.14, 13.72. IR (KBr)  $\nu$ : 3103, 2980, 1735, 1506, 1250, 1027  $\text{cm}^{-1}$ . **HRMS** ( $m/z$ ) [ESI]: calculated for  $\text{C}_{28}\text{H}_{27}\text{O}_7\text{S}_2^+$   $[\text{M}+\text{H}]^+$ : 539.1193, found 539.1201.

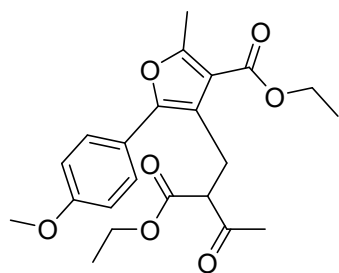

**ethyl 4-(2-(ethoxycarbonyl)-3-oxobutyl)-5-(4-methoxyphenyl)-2-methylfuran-3-carboxylate (3na).** yellow liquid (48.3 mg, 80%).  $^1\text{H NMR}$  (400 MHz, Chloroform-*d*)  $\delta$  7.49 (d,  $J = 8.0$  Hz, 2H), 6.92 (d,  $J = 8.0$  Hz, 2H), 4.29 (q,  $J = 8.0$  Hz, 2H), 4.04-3.93 (m, 2H), 3.88-3.82 (m, 1H), 3.80 (s, 3H), 3.35 (d,  $J = 8.0$  Hz, 2H), 2.56 (s, 3H), 2.10 (s, 3H), 1.34 (t,  $J = 6.0$  Hz, 3H), 1.03 (t,  $J = 6.0$  Hz, 3H).  $^{13}\text{C NMR}$  (100 MHz, Chloroform-*d*)  $\delta$  202.79, 169.41, 164.32, 159.23, 158.78, 149.04, 128.28, 122.90, 115.82, 113.92, 113.83, 61.10, 60.03, 59.51, 55.18, 28.91, 22.96, 14.57, 14.18, 13.71. IR (KBr)  $\nu$ : 3057, 2984, 1714, 1508, 1253, 1027  $\text{cm}^{-1}$ . HRMS ( $m/z$ ) [ESI]: calculated for  $\text{C}_{22}\text{H}_{26}\text{O}_7 + \text{Na}^+$   $[\text{M} + \text{Na}]^+$ : 425.1571, found 425.1577.

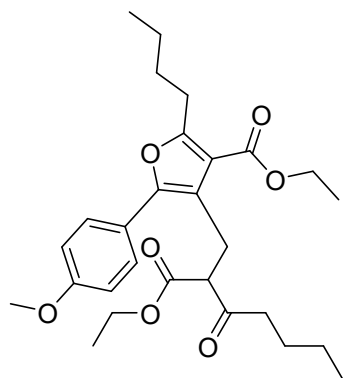

**ethyl 2-butyl-4-(2-(ethoxycarbonyl)-3-oxoheptyl)-5-(4-methoxyphenyl)furan-3-carboxylate (3oa).** yellow liquid (51.8 mg, 71%).  $^1\text{H NMR}$  (400 MHz, Chloroform-*d*)  $\delta$  7.49 (d,  $J = 8.9$  Hz, 2H), 6.91 (d,  $J = 8.9$  Hz, 2H), 4.28 (q,  $J = 7.1$  Hz, 2H), 4.03-3.95 (m, 2H), 3.89-3.82 (m, 1H), 3.79 (s, 3H), 3.35 (d,  $J = 8.0$  Hz, 2H), 2.98-2.94 (m, 2H), 2.45-2.27 (m, 2H), 1.69-1.61 (m, 2H), 1.45-1.31 (m, 7H), 1.21-1.12 (m, 2H), 1.03 (t,  $J = 7.1$  Hz, 3H), 0.90 (t,  $J = 7.4$  Hz, 3H), 0.80 (t,  $J = 7.3$  Hz, 3H).  $^{13}\text{C NMR}$  (100 MHz, Chloroform-*d*)  $\delta$  205.11, 169.44, 164.22, 162.69, 159.14, 148.91, 128.12, 122.97, 115.70, 113.86, 113.39, 60.94, 59.94, 58.40, 55.10, 41.95, 30.15, 27.96, 25.25, 23.06, 22.27, 21.89, 14.10, 13.70, 13.65, 13.61. IR (KBr)  $\nu$ : 3068, 2951, 1713, 1508, 1252, 1030  $\text{cm}^{-1}$ . HRMS ( $m/z$ ) [ESI]: calculated for  $\text{C}_{28}\text{H}_{39}\text{O}_7 + \text{H}^+$   $[\text{M} + \text{H}]^+$ : 487.2690, found 487.2685.

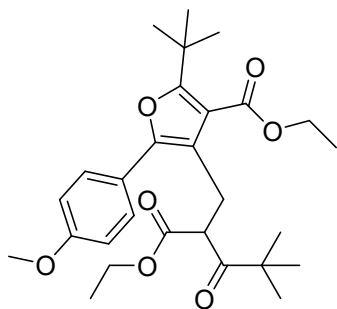

**ethyl 2-(tert-butyl)-4-(2-(ethoxycarbonyl)-4,4-dimethyl-3-oxopentyl)-5-(4-methoxyphenyl)furan-3-carboxylate (3pa).** yellow liquid (54.0 mg, 74%).  $^1\text{H NMR}$  (400 MHz, Chloroform-*d*)  $\delta$  7.52 (d,  $J = 8.0$  Hz, 2H), 6.92 (d,  $J = 8.0$  Hz, 2H), 4.38-4.29 (m, 2H), 4.26 (t,  $J = 7.5$  Hz, 1H), 4.04-3.90 (m, 2H), 3.79 (s, 3H), 3.34-3.32 (m, 2H), 1.39-1.35 (m, 12H), 1.09 (t,  $J = 8.0$  Hz, 3H), 0.95 (s, 9H).  $^{13}\text{C NMR}$  (100 MHz, Chloroform-*d*)  $\delta$  209.70, 169.10, 164.97, 164.23, 159.00, 147.06, 127.65, 123.12, 116.18, 114.21, 113.88, 61.00, 60.54, 55.06, 51.93, 45.03, 34.39, 28.45, 25.71, 24.64, 14.01, 13.74. IR (KBr)  $\nu$ : 3077, 2975, 1712, 1508, 1252, 1034  $\text{cm}^{-1}$ . HRMS ( $m/z$ ) [ESI]: calculated for  $\text{C}_{28}\text{H}_{39}\text{O}_7^+$  [ $\text{M}+\text{H}$ ] $^+$ : 487.2690, found 487.2688.

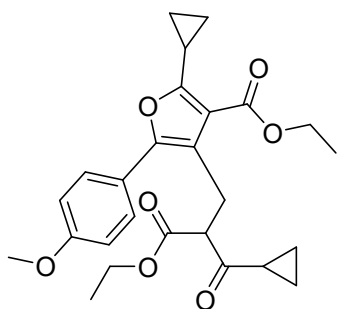

**ethyl 4-(2-(cyclopropanecarbonyl)-3-ethoxy-3-oxopropyl)-2-cyclopropyl-5-(4-methoxyphenyl)furan-3-carboxylate (3qa).** yellow solid (53.1 mg, 78%). mp: 82-86  $^{\circ}\text{C}$ .  $^1\text{H NMR}$  (400 MHz, Chloroform-*d*)  $\delta$  7.42 (d,  $J = 8.8$  Hz, 2H), 6.87 (d,  $J = 8.8$  Hz, 2H), 4.29 (q,  $J = 7.1$  Hz, 2H), 4.11 (t,  $J = 8.0$  Hz, 1H), 4.04-3.96 (m, 1H), 3.87-3.79 (m, 1H), 3.75 (s, 3H), 3.37 (d,  $J = 8.0$  Hz, 2H), 2.79-2.72 (m, 1H), 1.97- 1.91 (m, 1H), 1.32 (t,  $J = 4.0$  Hz, 3H), 1.05-0.98 (m, 7H), 0.94-0.88 (m, 2H), 0.79-0.70 (m, 2H).  $^{13}\text{C NMR}$  (100 MHz, Chloroform-*d*)  $\delta$  204.92, 169.39, 164.50, 162.49, 158.98, 147.59, 127.99, 122.90, 115.92, 113.72, 113.42, 60.82, 59.86, 59.50, 55.02, 22.99, 19.71, 14.07, 13.66, 11.54, 11.34, 9.41, 8.48, 8.39. IR (KBr)  $\nu$ : 3055, 2983, 1737, 1513, 1255, 1042  $\text{cm}^{-1}$ . HRMS ( $m/z$ ) [ESI]: calculated for  $\text{C}_{26}\text{H}_{30}\text{O}_7+\text{Na}^+$  [ $\text{M}+\text{Na}$ ] $^+$ : 477.1884, found 477.1883.

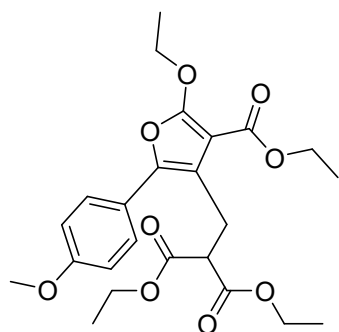

**diethyl 2-((5-ethoxy-4-(ethoxycarbonyl)-2-(4-methoxyphenyl)furan-3-yl)methyl)malonate (3ra).** yellow solid (52.0 mg, 75%). mp: 40-42 °C.  $^1\text{H NMR}$  (400 MHz, Chloroform-*d*)  $\delta$  7.43 (d,  $J = 8.7$  Hz, 2H), 6.88 (d,  $J = 8.7$  Hz, 2H), 4.41 (q,  $J = 8.0$  Hz, 2H), 4.23 (q,  $J = 8.0$  Hz, 2H), 4.06-3.97 (m, 2H), 3.95-3.87 (m, 3H), 3.76 (s, 3H), 3.37 (d,  $J = 8.0$  Hz, 2H), 1.42 (t,  $J = 4.0$  Hz, 3H), 1.28 (t,  $J = 8.0$  Hz, 3H), 1.06 (t,  $J = 8.0$  Hz, 6H).  $^{13}\text{C NMR}$  (100 MHz, Chloroform-*d*)  $\delta$  168.86, 163.29, 161.77, 158.83, 140.88, 127.79, 122.46, 115.84, 113.80, 92.47, 67.26, 60.96, 59.56, 55.05, 51.54, 23.96, 14.75, 14.05, 13.67. IR (KBr) v: 3045, 2984, 1733, 1597, 1254, 1030  $\text{cm}^{-1}$ . HRMS ( $m/z$ ) [ESI]: calculated for  $\text{C}_{24}\text{H}_{30}\text{O}_9 + \text{Na}^+$   $[\text{M} + \text{Na}]^+$ : 485.1782, found 485.1789.

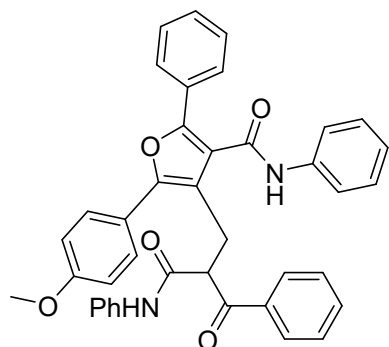

**4-(2-benzoyl-3-oxo-3-(phenylamino)propyl)-5-(4-methoxyphenyl)-N,2-diphenylfuran-3-carboxamide (3sa).** red solid (53.1 mg, 57%). mp: 165-167 °C.  $^1\text{H NMR}$  (400 MHz, Chloroform-*d*)  $\delta$  9.15 (s, 1H), 8.19 (s, 1H), 7.98 (d,  $J = 4.0$  Hz, 2H), 7.70 (d,  $J = 8.0$  Hz, 2H), 7.61-7.52 (m, 5H), 7.43-7.34 (m, 9H), 7.19 (q,  $J = 8.0$  Hz, 3H), 7.01 (t,  $J = 8.0$  Hz, 1H), 6.91 (d,  $J = 8.0$  Hz, 2H), 5.09 (dd,  $J = 9.0, 7.1$  Hz, 1H), 3.81 (s, 3H), 3.70 (dd,  $J = 14.8, 8.0$  Hz, 1H), 3.41 (dd,  $J = 14.8, 8.0$  Hz, 1H).  $^{13}\text{C NMR}$  (100 MHz, Chloroform-*d*)  $\delta$  197.01, 166.92, 164.15, 159.59, 150.98, 150.33, 137.58, 137.51, 136.03, 133.73, 129.15, 129.12, 128.88, 128.87, 128.71, 128.67, 128.57, 126.55, 124.95, 124.13, 122.42, 120.10, 119.67, 116.44, 114.08, 55.21, 55.03, 25.30. IR (KBr) v: 3287, 3058, 2929, 1653, 1504, 1252, 1028  $\text{cm}^{-1}$ . HRMS ( $m/z$ ) [ESI]: calculated for  $\text{C}_{40}\text{H}_{33}\text{N}_2\text{O}_5^+$   $[\text{M} + \text{H}]^+$ : 621.2384, found 621.2392.

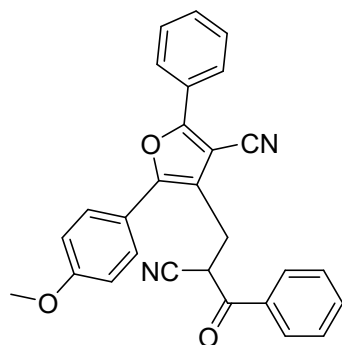

**4-(2-cyano-3-oxo-3-phenylpropyl)-5-(4-methoxyphenyl)-2-phenylfuran-3-carbonitrile (3ta).** red solid (31.1 mg, 48%). mp: 56-59 °C.  $^1\text{H NMR}$  (600 MHz, Chloroform-*d*)  $\delta$  8.04-8.01 (m, 4H), 7.68-7.64 (m, 3H), 7.55-7.50 (m, 4H), 7.46 (t,  $J = 6.0$  Hz, 1H), 7.03 (d,  $J = 6.0$  Hz, 2H), 4.94 (dd,  $J = 12.0, 6.0$  Hz, 1H), 3.88 (s, 3H), 3.51 (dd,  $J = 15.0, 10.3$  Hz, 1H), 3.40 (dd,  $J = 15.0, 6.1$  Hz, 1H).  $^{13}\text{C NMR}$  (150 MHz, Chloroform-*d*)  $\delta$  189.44, 160.45, 158.51, 151.61, 134.91, 133.62, 130.37, 129.24, 129.14, 129.00, 128.55, 127.68, 125.34, 120.97, 116.27, 115.81, 114.88, 114.56, 93.85, 55.41, 38.64, 24.84. IR (KBr)  $\nu$ : 3064, 2926, 2227, 1757, 1598, 1260, 1026  $\text{cm}^{-1}$ . HRMS (m/z) [ESI]: calculated for  $\text{C}_{28}\text{H}_{21}\text{N}_2\text{O}_3^+ [\text{M}+\text{H}]^+$ : 433.1547, found 433.1547.

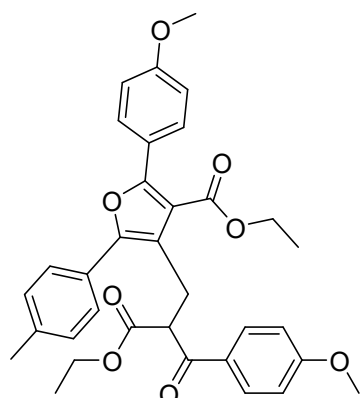

**ethyl 4-(3-ethoxy-2-(4-methoxybenzoyl)-3-oxopropyl)-2-(4-methoxyphenyl)-5-(*p*-tolyl)furan-3-carboxylate (3ab).** yellow liquid (69.3 mg, 81%).  $^1\text{H NMR}$  (600 MHz, Chloroform-*d*)  $\delta$  7.88 (d,  $J = 12.0$  Hz, 2H), 7.73 (d,  $J = 12.0$  Hz, 2H), 7.52 (d,  $J = 6.0$  Hz, 2H), 7.21 (d,  $J = 6.0$  Hz, 2H), 6.94 (d,  $J = 12.0$  Hz, 2H), 6.86 (d,  $J = 6.0$  Hz, 2H), 4.83-4.81 (m, 1H), 4.31-4.25 (m, 2H), 3.98-3.93 (m, 1H), 3.85 (s, 3H), 3.82 (s, 3H), 3.81-3.79 (m, 1H), 3.67 (dd,  $J = 14.5, 6.0$  Hz, 1H), 3.55 (dd,  $J = 14.5, 6.0$  Hz, 1H), 2.37 (s, 3H), 1.24 (t,  $J = 6.0$  Hz, 3H), 0.97 (t,  $J = 6.0$  Hz, 3H).  $^{13}\text{C NMR}$  (150 MHz, Chloroform-*d*)  $\delta$  193.41, 169.73, 164.37, 163.63, 160.20, 156.68, 149.84, 137.87, 130.89, 130.07, 129.29, 129.21, 127.37, 126.80, 122.72, 117.86, 113.89, 113.60, 113.27, 61.16, 60.48, 55.37, 55.24, 53.83, 24.06, 21.22, 13.96, 13.66. IR (KBr)  $\nu$ : 3065, 2974, 1735, 1601, 1257, 1030  $\text{cm}^{-1}$ . HRMS (m/z) [ESI]: calculated for  $\text{C}_{34}\text{H}_{35}\text{O}_8^+ [\text{M}+\text{H}]^+$ : 571.2326, found 571.2331.



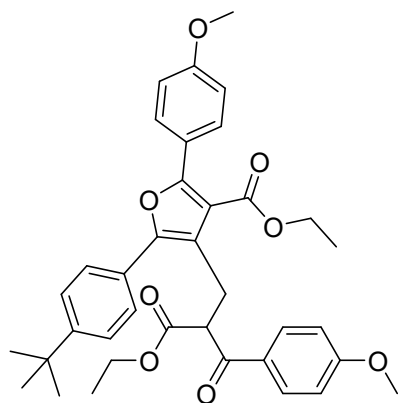

**ethyl 5-(4-(*tert*-butyl)phenyl)-4-(3-ethoxy-2-(4-methoxybenzoyl)-3-oxopropyl)-2-(4-methoxyphenyl)furan-3-carboxylate (3ac).** yellow liquid (66.1 mg, 72%).  $^1\text{H NMR}$  (600 MHz, Chloroform-*d*)  $\delta$  7.91 (d,  $J = 6.0$  Hz, 2H), 7.74 (d,  $J = 12.0$  Hz, 2H), 7.58 (d,  $J = 12.0$  Hz, 2H), 7.43 (d,  $J = 12.0$  Hz, 2H), 6.94 (d,  $J = 12.0$  Hz, 2H), 6.87 (d,  $J = 6.0$  Hz, 2H), 4.83 (dd,  $J = 8.4, 6.4$  Hz, 1H), 4.30-4.24 (m, 2H), 3.96-3.90 (m, 1H), 3.86 (s, 3H), 3.83 (s, 3H), 3.78-3.73 (m, 1H), 3.70 (dd,  $J = 14.6, 8.7$  Hz, 1H), 3.54 (dd,  $J = 14.5, 6.3$  Hz, 1H), 1.34 (s, 9H), 1.23 (t,  $J = 7.1$  Hz, 3H), 0.92 (t,  $J = 7.1$  Hz, 3H).  $^{13}\text{C NMR}$  (150 MHz, Chloroform-*d*)  $\delta$  193.42, 169.74, 164.40, 163.67, 160.23, 156.80, 151.01, 149.86, 130.94, 130.12, 129.33, 127.42, 126.69, 125.49, 122.78, 118.00, 113.91, 113.66, 113.30, 61.14, 60.49, 55.40, 55.28, 54.07, 34.62, 31.19, 24.08, 14.00, 13.67. IR (KBr)  $\nu$ : 3079, 2923, 1706, 1601, 1256, 1031  $\text{cm}^{-1}$ . **HRMS** ( $m/z$ ) [ESI]: calculated for  $\text{C}_{37}\text{H}_{40}\text{O}_8 + \text{Na}^+$   $[\text{M} + \text{Na}]^+$ : 635.2615, found 635.2622.

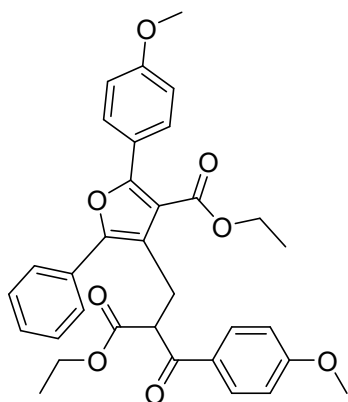

**ethyl 4-(3-ethoxy-2-(4-methoxybenzoyl)-3-oxopropyl)-2-(4-methoxyphenyl)-5-phenylfuran-3-carboxylate (3ad).** yellow liquid (65.1 mg, 78%).  $^1\text{H NMR}$  (600 MHz, Chloroform-*d*)  $\delta$  7.89 (d,  $J = 12.0$  Hz, 2H), 7.75 (d,  $J = 6.0$  Hz, 2H), 7.65-7.64 (m, 2H), 7.41 (t,  $J = 6.0$  Hz, 2H), 7.32 (t,  $J = 6.0$  Hz, 1H), 6.95 (d,  $J = 6.0$  Hz, 2H), 6.86 (d,  $J = 12.0$  Hz, 2H), 4.85-4.82 (m, 1H), 4.31-4.25 (m, 2H), 3.98-3.92 (m, 1H), 3.85 (s, 3H), 3.81 (s, 3H), 3.81-3.76 (m, 1H), 3.70 (dd,  $J = 14.5, 6.0$  Hz, 1H), 3.57 (dd,  $J = 14.5, 6.0$  Hz, 1H), 1.24 (t,  $J = 6.0$  Hz, 3H), 0.95 (t,  $J = 6.0$  Hz, 3H).  $^{13}\text{C NMR}$  (150 MHz, Chloroform-*d*)  $\delta$  193.33, 169.68, 164.31, 163.65, 160.27, 156.96, 149.61, 130.89, 130.20, 130.11, 129.26, 128.52, 127.94, 126.87, 122.63, 118.50, 113.95, 113.63, 113.29, 61.15, 60.51, 55.37, 55.24, 53.86, 24.03, 13.96, 13.66. IR (KBr)  $\nu$ : 3068, 2980, 1732, 1601, 1257, 1028  $\text{cm}^{-1}$ . **HRMS** ( $m/z$ ) [ESI]: calculated for  $\text{C}_{33}\text{H}_{32}\text{O}_8 + \text{Na}^+$   $[\text{M} + \text{Na}]^+$ : 579.1989, found 579.1996.

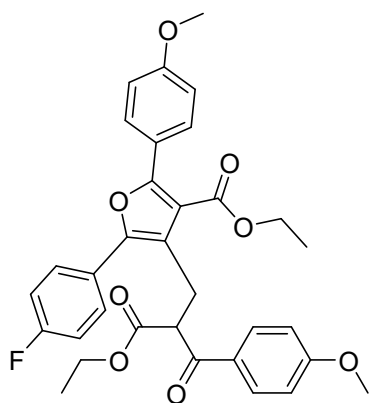

**ethyl 4-(3-ethoxy-2-(4-methoxybenzoyl)-3-oxopropyl)-5-(4-fluorophenyl)-2-(4-methoxyphenyl)furan-3-carboxylate (3ae).** yellow liquid (63.7 mg, 74%).  $^1\text{H NMR}$  (400 MHz, Chloroform-*d*)  $\delta$  7.88 (d,  $J = 8.9$  Hz, 2H), 7.72 (d,  $J = 8.9$  Hz, 2H), 7.63-7.60 (m, 2H), 7.10 (t,  $J = 8.0$  Hz, 2H), 6.94 (d,  $J = 8.0$  Hz, 2H), 6.86 (d,  $J = 8.0$  Hz, 2H), 4.86 (t,  $J = 8.0$  Hz, 1H), 4.32-4.24 (m, 2H), 4.02-3.94 (m, 1H), 3.89- 3.86 (m, 1H), 3.84 (s, 3H), 3.82 (s, 3H), 3.63 (dd,  $J = 16.0, 8.0$  Hz, 1H), 3.52 (dd,  $J = 16.0, 8.0$  Hz, 1H), 1.24 (t,  $J = 8.0$  Hz, 3H), 0.99 (t,  $J = 8.0$  Hz, 3H).  $^{13}\text{C NMR}$  (100 MHz, Chloroform-*d*)  $\delta$  193.35, 169.65, 164.24, 163.71, 163.56, 161.09, 160.33, 157.00, 148.82, 130.90, 130.11, 129.24, 128.86 (d,  $J = 8.0$  Hz), 126.41 (d,  $J = 3.0$  Hz), 122.52, 118.27, 115.55 (d,  $J = 21.0$  Hz), 113.86, 113.48 (d,  $J = 33.0$  Hz), 61.19, 60.55, 55.38, 55.24, 53.62, 24.08, 13.95, 13.71.  $^{19}\text{F NMR}$  (376 MHz, Chloroform-*d*)  $\delta$  -112.92. IR (KBr)  $\nu$ : 3080, 2980, 1735, 1600, 1257, 1030  $\text{cm}^{-1}$ . **HRMS** ( $m/z$ ) [ESI]: calculated for  $\text{C}_{33}\text{H}_{30}\text{FO}_8 + \text{Na}^+$  [ $\text{M} + \text{Na}$ ] $^+$ : 597.1895, found 597.1905.

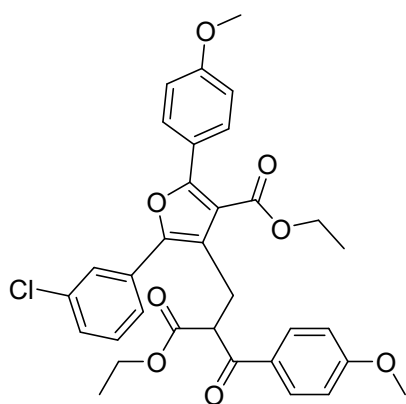

**ethyl 5-(3-chlorophenyl)-4-(3-ethoxy-2-(4-methoxybenzoyl)-3-oxopropyl)-2-(4-methoxyphenyl)furan-3-carboxylate (3af).** yellow solid (51.4 mg, 58%). mp: 41-44  $^{\circ}\text{C}$ .  $^1\text{H NMR}$  (600 MHz, Chloroform-*d*)  $\delta$  7.87 (d,  $J = 6.0$  Hz, 2H), 7.72 (d,  $J = 6.0$  Hz, 2H), 7.57-7.56 (m, 2H), 7.34 (t,  $J = 6.0$  Hz, 1H), 7.29 (d,  $J = 7.9$  Hz, 1H), 6.95 (d,  $J = 12.0$  Hz, 2H), 6.86 (d,  $J = 12.0$  Hz, 2H), 4.81 (t,  $J = 6.0$  Hz, 1H), 4.31-4.25 (m, 2H), 4.02-3.96 (m, 1H), 3.89-3.87 (m, 1H), 3.86 (s, 3H), 3.84 (s, 3H), 3.65 (dd,  $J = 14.5, 6.0$  Hz, 1H), 3.54 (dd,  $J = 14.5, 6.0$  Hz, 1H), 1.24 (t,  $J = 6.0$  Hz, 3H), 0.99 (t,  $J = 6.0$  Hz, 3H).  $^{13}\text{C NMR}$  (150 MHz, Chloroform-*d*)  $\delta$  193.30, 169.67, 164.17, 163.75, 160.48, 157.45, 148.13, 134.49, 131.90, 130.96, 130.23, 129.86, 129.21, 127.96, 126.82, 124.87, 122.39, 119.67, 114.07, 113.69, 113.39, 61.32, 60.68, 55.46, 55.34, 53.79, 24.07, 14.00, 13.75. IR (KBr)  $\nu$ : 3065, 2926, 1735, 1601, 1258, 1030  $\text{cm}^{-1}$ . **HRMS** ( $m/z$ ) [ESI]: calculated for  $\text{C}_{33}\text{H}_{32}\text{ClO}_8 + \text{H}^+$  [ $\text{M} + \text{H}$ ] $^+$ : 591.1780, found 591.1779.

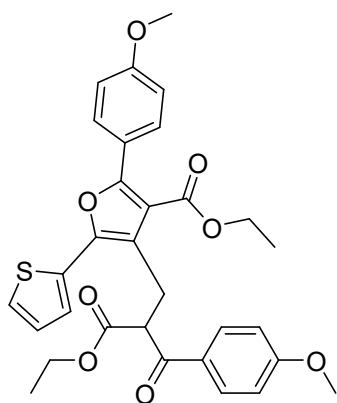

**ethyl 4-(3-ethoxy-2-(4-methoxybenzoyl)-3-oxopropyl)-2-(4-methoxyphenyl)-5-(thiophen-2-yl)furan-3-carboxylate (3ag).** yellow liquid (53.2 mg, 63%).  $^1\text{H NMR}$  (400 MHz, Chloroform-*d*)  $\delta$  7.91 (d,  $J = 8.0$  Hz, 2H), 7.73 (d,  $J = 8.0$  Hz, 2H), 7.43 (dd,  $J = 3.7, 1.0$  Hz, 1H), 7.30 (dd,  $J = 5.1, 1.0$  Hz, 1H), 7.07 (dd,  $J = 5.0, 3.7$  Hz, 1H), 6.94 (d,  $J = 8.9$  Hz, 2H), 6.87 (d,  $J = 8.9$  Hz, 2H), 4.90-4.86 (m, 1H), 4.32- 4.24 (m, 2H), 4.07-3.93 (m, 2H), 3.84 (s, 3H), 3.81 (s, 3H), 3.68 (dd,  $J = 16.0, 8.0$  Hz, 1H), 3.55 (dd,  $J = 16.0, 8.0$  Hz, 1H), 1.25 (t,  $J = 8.0$  Hz, 3H), 1.03 (t,  $J = 8.0$  Hz, 3H).  $^{13}\text{C NMR}$  (100 MHz, Chloroform-*d*)  $\delta$  193.29, 169.67, 163.99, 163.66, 160.33, 156.57, 145.27, 131.66, 130.87, 130.09, 129.25, 127.44, 125.26, 124.77, 122.29, 118.20, 114.06, 113.62, 113.29, 61.23, 60.55, 55.34, 55.21, 53.35, 24.27, 13.92, 13.72. IR (KBr)  $\nu$ : 3080, 2980, 1710, 1601, 1258, 1029  $\text{cm}^{-1}$ . **HRMS** ( $m/z$ ) [ESI]: calculated for  $\text{C}_{31}\text{H}_{31}\text{O}_8\text{S}^+$  [ $\text{M}+\text{H}$ ] $^+$ : 563.1734, found 563.1738.

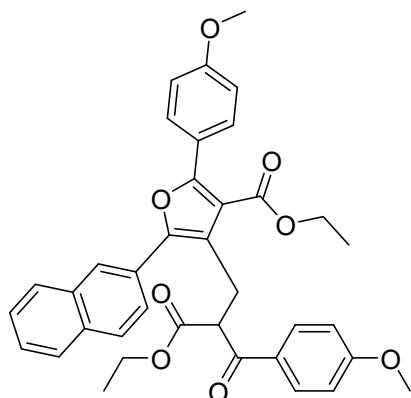

**ethyl 4-(3-ethoxy-2-(4-methoxybenzoyl)-3-oxopropyl)-2-(4-methoxyphenyl)-5-(naphthalen-2-yl)furan-3-carboxylate (3ah).** yellow liquid (65.5 mg, 72%).  $^1\text{H NMR}$  (600 MHz, Chloroform-*d*)  $\delta$  8.10 (s, 1H), 7.88-7.86 (m, 4H), 7.84-7.77 (m, 4H), 7.51-7.47 (m, 2H), 6.98 (d,  $J = 8.8$  Hz, 2H), 6.81 (d,  $J = 8.9$  Hz, 2H), 4.86 (t,  $J = 6.0$  Hz, 1H), 4.36-4.29 (m, 2H), 3.97-3.92 (m, 1H), 3.86 (s, 3H), 3.84-3.80 (m, 2H), 3.78 (s, 3H), 3.71-3.67 (m, 1H), 1.28 (t,  $J = 6.0$  Hz, 3H), 0.91 (t,  $J = 6.0$  Hz, 3H).  $^{13}\text{C NMR}$  (150 MHz, Chloroform-*d*)  $\delta$  193.35, 169.72, 164.28, 163.59, 160.29, 157.06, 149.59, 133.10, 132.62, 130.85, 130.12, 129.17, 128.30, 128.15, 127.54, 127.52, 126.32, 125.91, 124.43, 122.60, 119.02, 114.14, 113.56, 113.31, 61.16, 60.55, 55.31, 55.23, 53.96, 24.15, 13.96, 13.58. IR (KBr)  $\nu$ : 3058, 2980, 1731, 1600, 1257, 1030  $\text{cm}^{-1}$ . **HRMS** ( $m/z$ ) [ESI]: calculated for  $\text{C}_{37}\text{H}_{35}\text{O}_8^+$  [ $\text{M}+\text{H}$ ] $^+$ : 607.2326, found 607.2322.

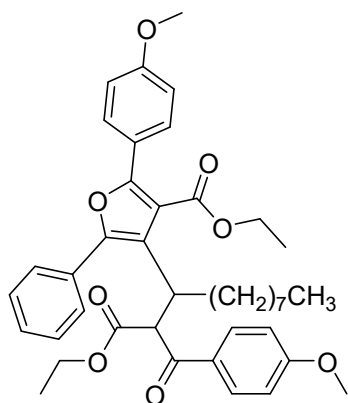

**ethyl 4-(1-ethoxy-2-(4-methoxybenzoyl)-1-oxoundecan-3-yl)-2-(4-methoxyphenyl)-5-phenylfuran-3-carboxylate (3ai).** yellow liquid (61.1 mg, 61%).  $^1\text{H NMR}$  (600 MHz, Chloroform-*d*)  $\delta$  7.94 (d,  $J = 6.0$  Hz, 2H), 7.84 (s, 2H), 7.47 (t,  $J = 7.6$  Hz, 2H), 7.41 (d,  $J = 12.0$  Hz, 2H), 7.37 (t,  $J = 6.0$  Hz, 1H), 6.86 (d,  $J = 12.0$  Hz, 2H), 6.82 (d,  $J = 12.0$  Hz, 2H), 4.27-4.22 (m, 1H), 4.18-4.12 (m, 4H), 3.89-3.84 (m, 1H), 3.82 (s, 3H), 3.79 (s, 3H), 1.92-1.87 (m, 1H), 1.66-1.61 (m, 1H), 1.23-1.17 (m, 9H), 1.14-1.04 (m, 9H), 0.83 (t,  $J = 7.3$  Hz, 3H).  $^{13}\text{C NMR}$  (150 MHz, Chloroform-*d*)  $\delta$  193.86, 169.34, 165.54, 163.40, 159.98, 156.24, 150.92, 131.26, 130.65, 130.12, 129.57, 128.44, 128.07, 127.94, 122.98, 120.74, 113.92, 113.32, 113.20, 61.18, 60.67, 57.04, 55.34, 55.26, 36.16, 32.09, 31.75, 29.36, 29.34, 29.17, 27.43, 22.58, 14.06, 14.05, 13.80. IR (KBr)  $\nu$ : 3053, 2921, 1741, 1602, 1257, 1033  $\text{cm}^{-1}$ . HRMS (m/z) [ESI]: calculated for  $\text{C}_{41}\text{H}_{49}\text{O}_8^+$  [M+H] $^+$ : 669.3422, found 669.3419.

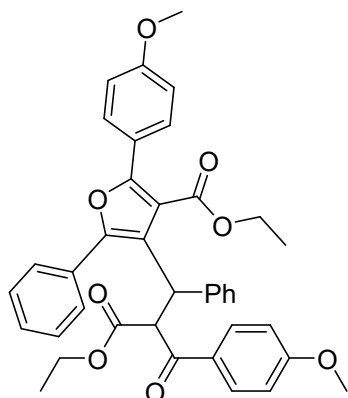

**ethyl 4-(3-ethoxy-2-(4-methoxybenzoyl)-3-oxo-1-phenylpropyl)-2-(4-methoxyphenyl)-5-phenylfuran-3-carboxylate (3aj).** yellow solid (43.6 mg, 46%). mp: 58-61  $^{\circ}\text{C}$ .  $^1\text{H NMR}$  (600 MHz, Chloroform-*d*)  $\delta$  8.03 (d,  $J = 6.0$  Hz, 2H), 7.80 (d,  $J = 6.0$  Hz, 2H), 7.46 (t,  $J = 6.0$  Hz, 2H), 7.42-7.39 (m, 3H), 7.34 (d,  $J = 6.0$  Hz, 2H), 7.23 (t,  $J = 6.0$  Hz, 2H), 7.15 (t,  $J = 6.0$  Hz, 1H), 6.84 (t,  $J = 8.6$  Hz, 4H), 6.09 (d,  $J = 12.0$  Hz, 1H), 5.57 (d,  $J = 12.0$  Hz, 1H), 4.12-4.07 (m, 1H), 4.05-4.02 (m, 1H), 4.02-3.98 (m, 2H), 3.81 (s, 3H), 3.80 (s, 3H), 1.04 (t,  $J = 6.0$  Hz, 3H), 1.00 (t,  $J = 6.0$  Hz, 3H).  $^{13}\text{C NMR}$  (150 MHz, Chloroform-*d*)  $\delta$  192.71, 168.66, 165.49, 163.64, 159.97, 155.48, 149.84, 141.18, 131.52, 130.55, 129.71, 129.29, 128.56, 128.46, 128.26, 128.11, 128.04, 126.47, 122.74, 121.86, 113.92, 113.44, 113.28, 61.31, 60.70, 55.89, 55.41, 55.25, 40.73, 13.80, 13.69. IR (KBr)  $\nu$ : 3065, 2932, 1710, 1601, 1258, 1030  $\text{cm}^{-1}$ . HRMS (m/z) [ESI]: calculated for  $\text{C}_{39}\text{H}_{37}\text{O}_8^+$  [M+H] $^+$ : 633.2483, found 633.2479.

## 11. Copies of $^1\text{H}$ NMR and $^{13}\text{C}$ NMR for the Products

ethyl 2,5-bis(4-methoxyphenyl)-4-methylfuran-3-carboxylate (10)

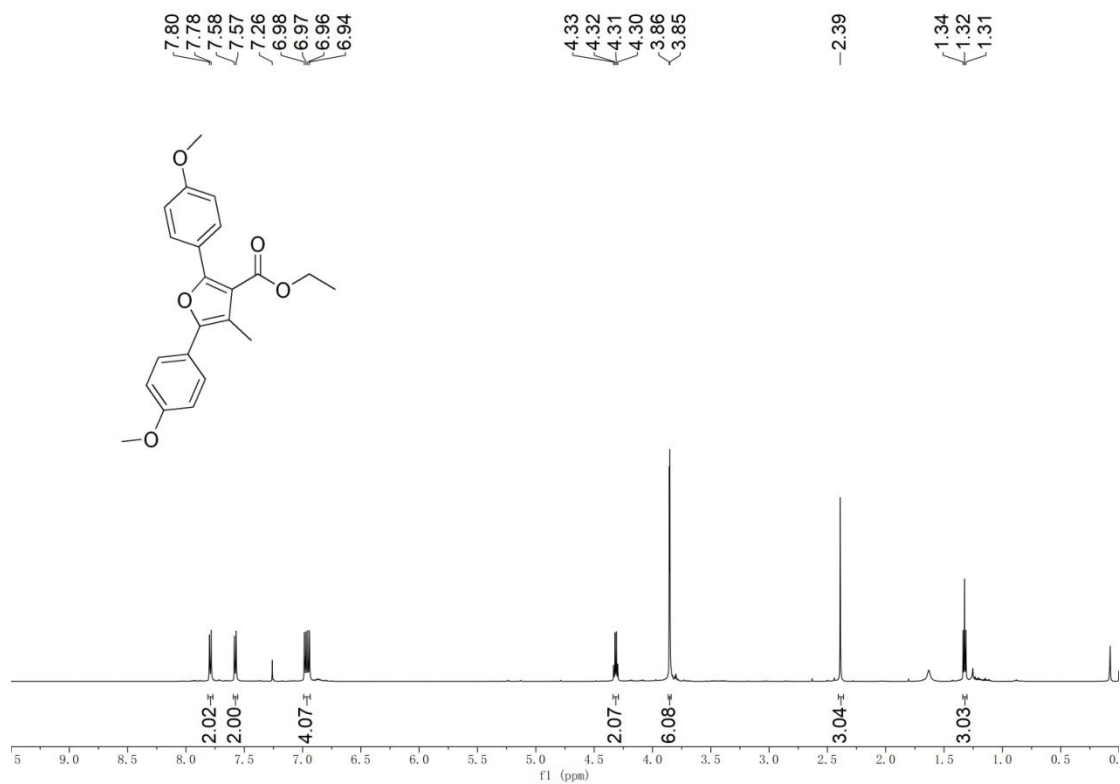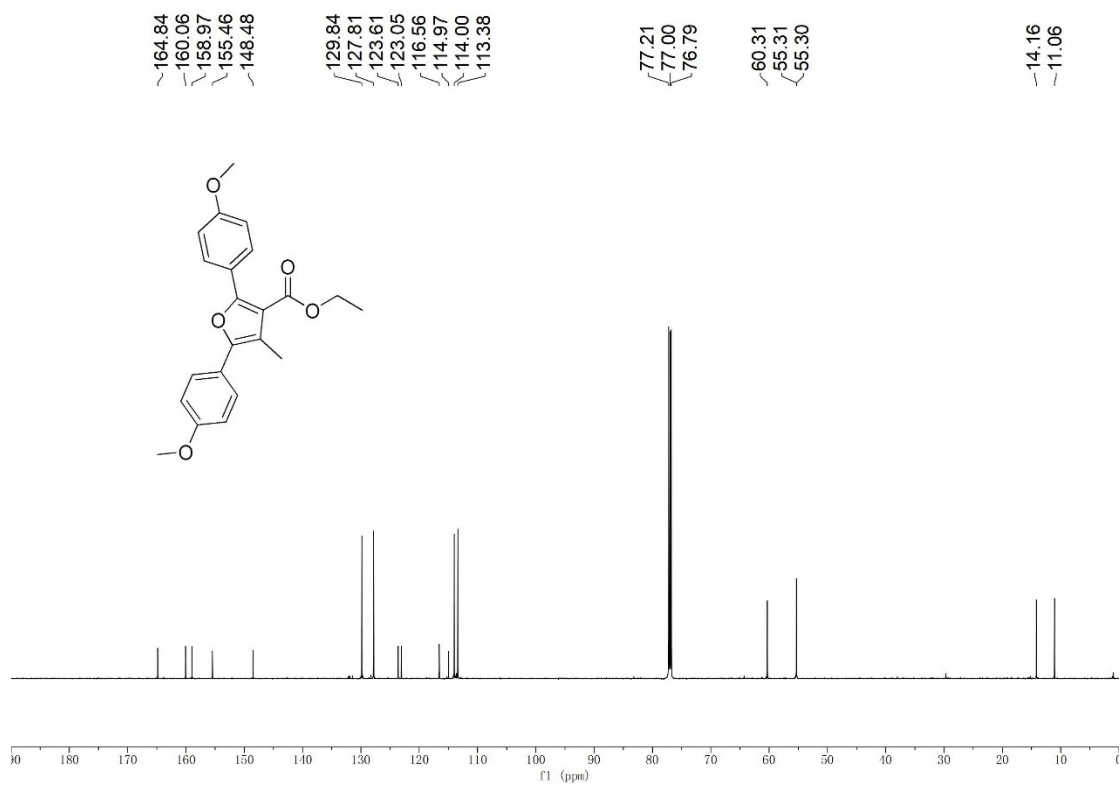

**Ethyl 4-(3-ethoxy-2-(4-methoxybenzoyl)-3-oxopropyl)-2,5-bis(4-methoxyphenyl)furan-3-carboxylate (3aa)**

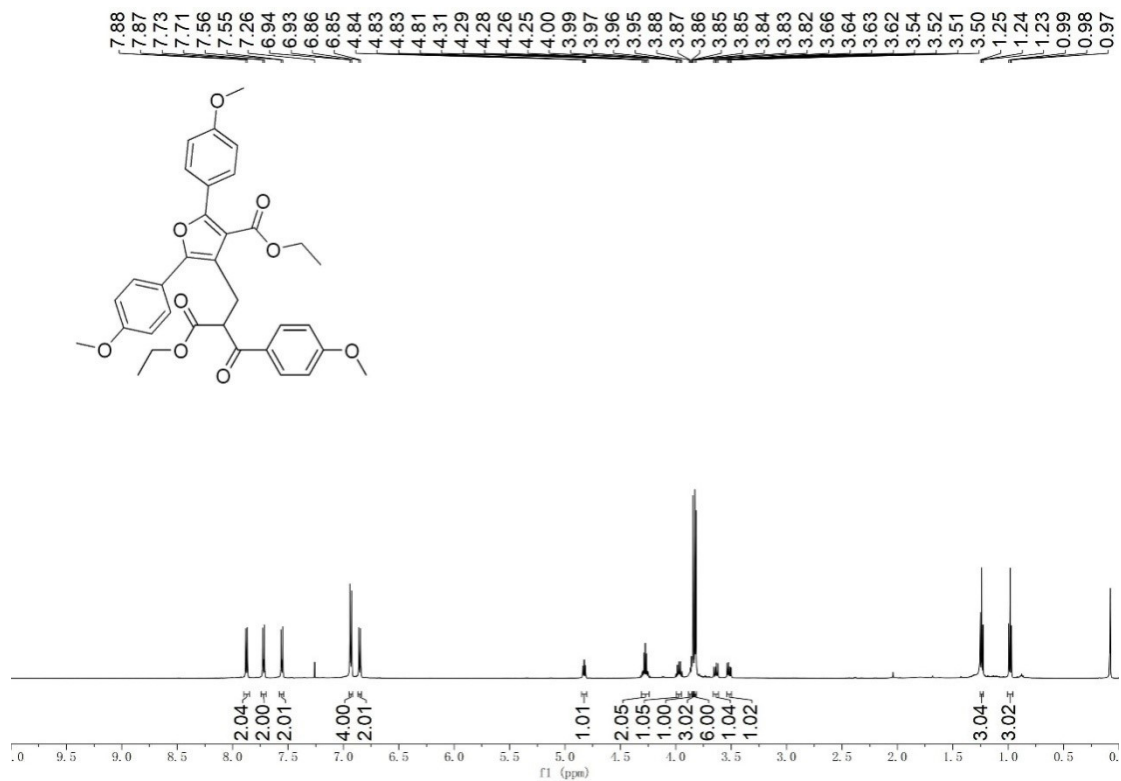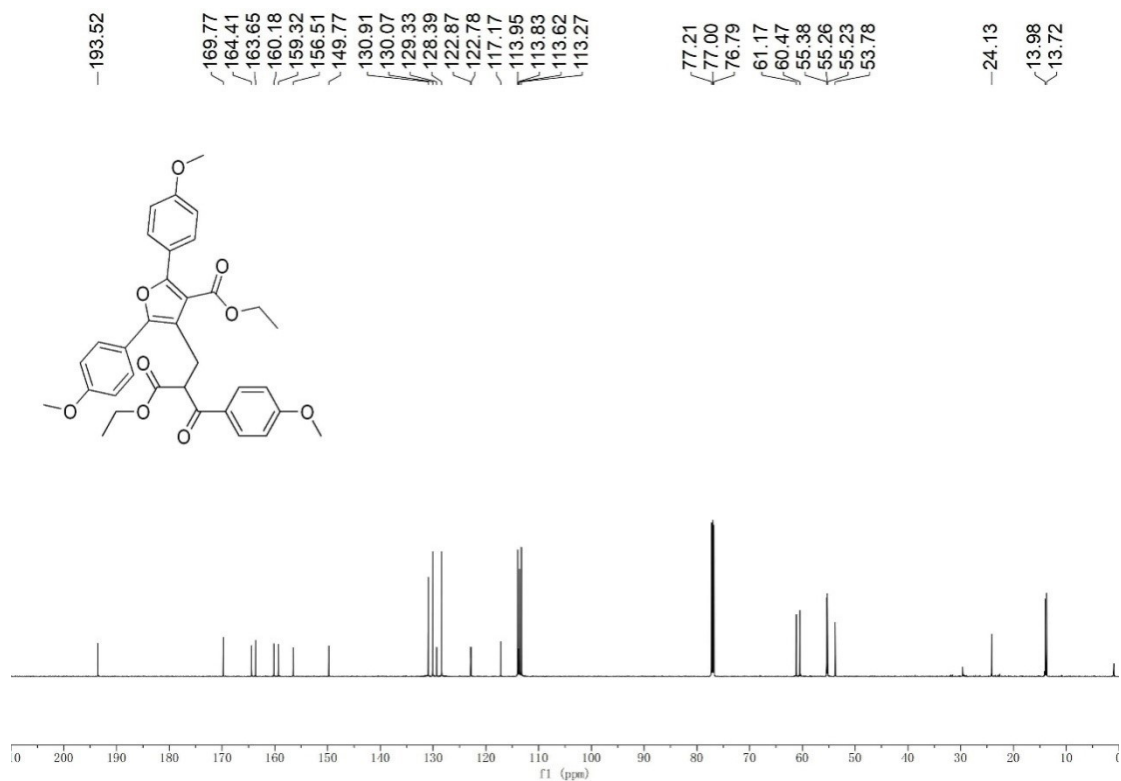

ethyl 4-(3-ethoxy-2-(4-methylbenzoyl)-3-oxopropyl)-5-(4-methoxyphenyl)-2-(*p*-tolyl)furan-3-carboxylate (3ba)

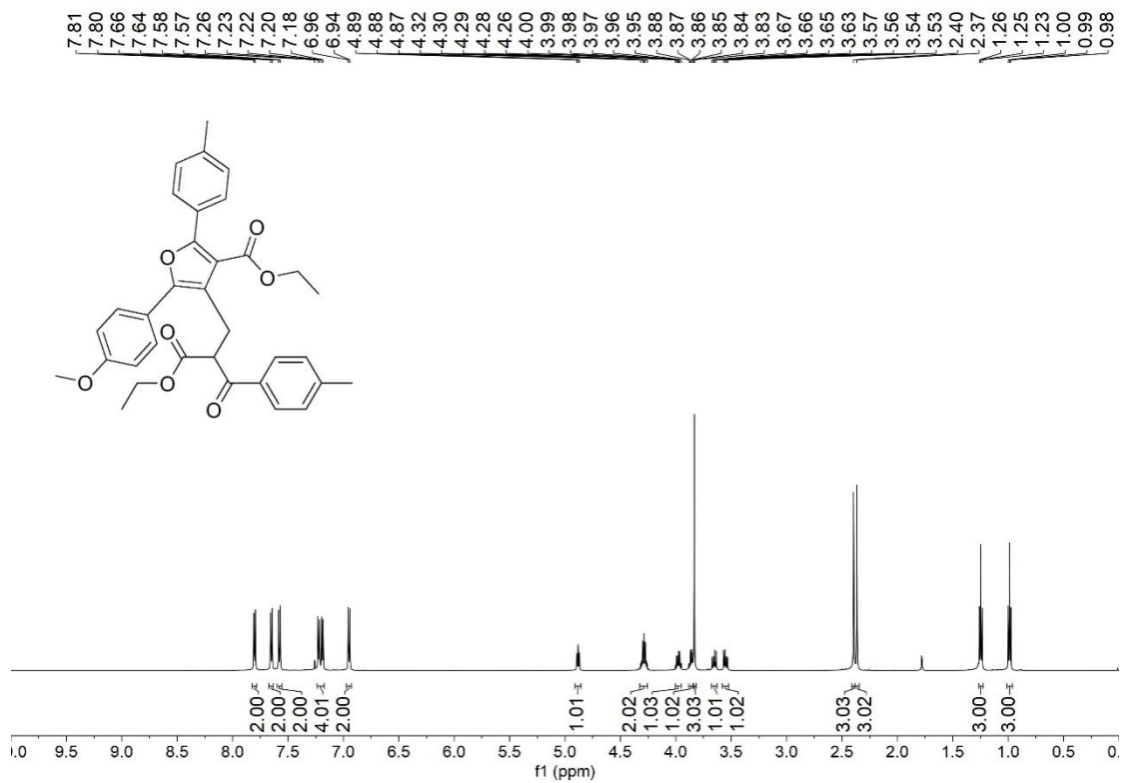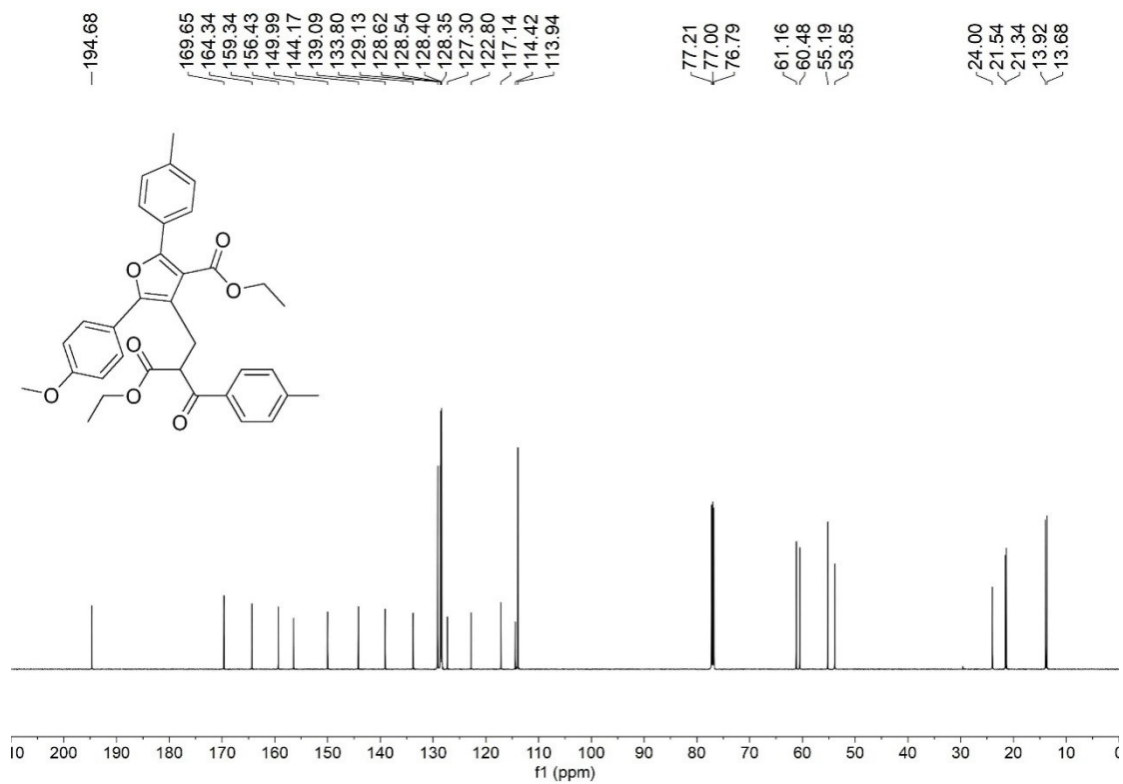

**ethyl 4-(2-(4-(*tert*-butyl)benzoyl)-3-ethoxy-3-oxopropyl)-2-(4-(*tert*-butyl)phenyl)-5-(4-methoxyphenyl)furan-3-carboxylate (3ca)**

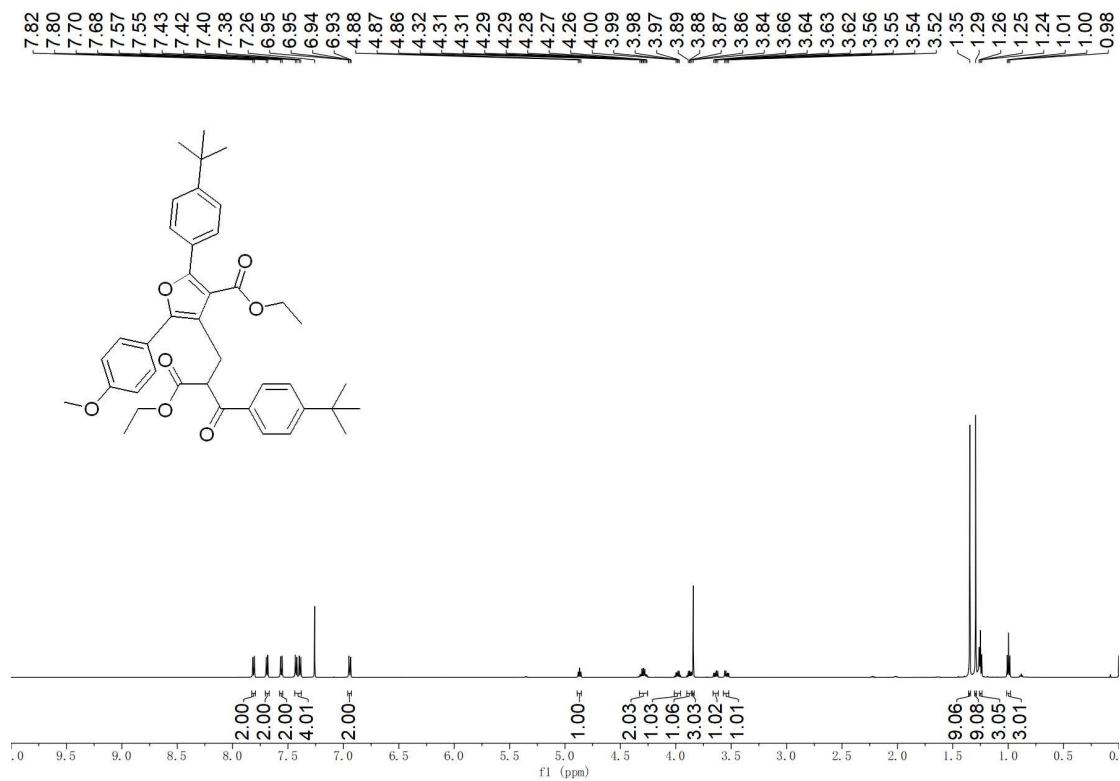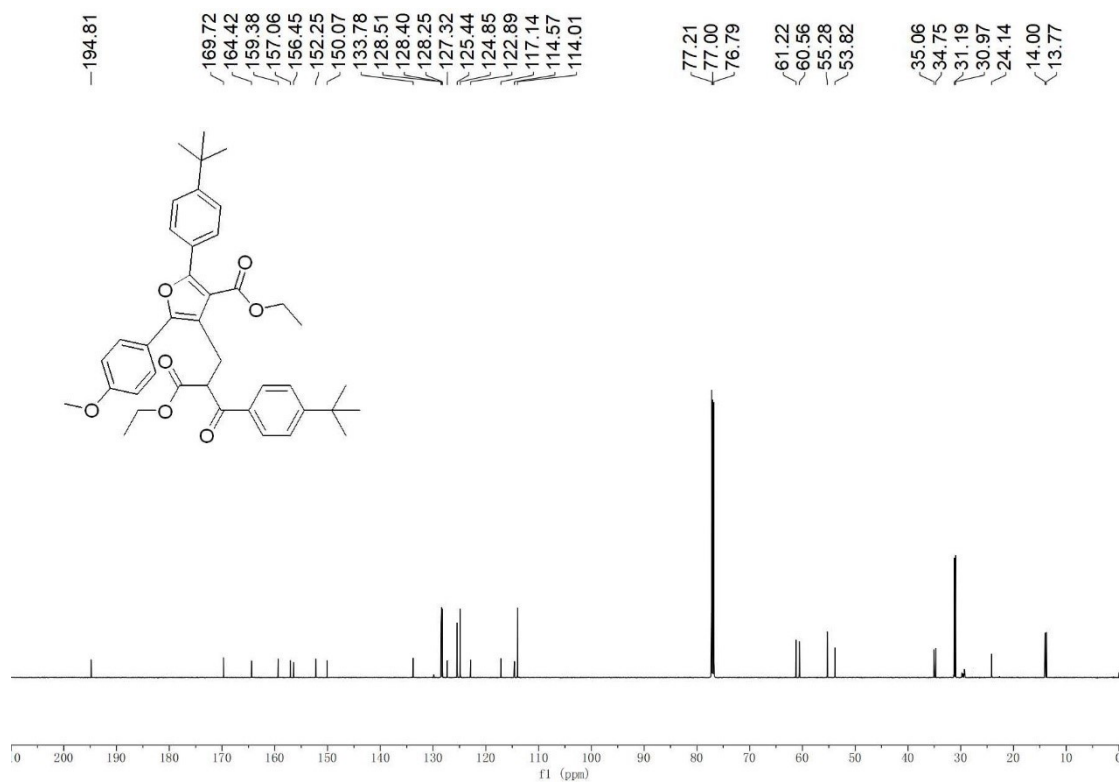

**ethyl 4-(2-benzoyl-3-ethoxy-3-oxopropyl)-5-(4-methoxyphenyl)-2-phenylfuran-3-carboxylate (3da)**



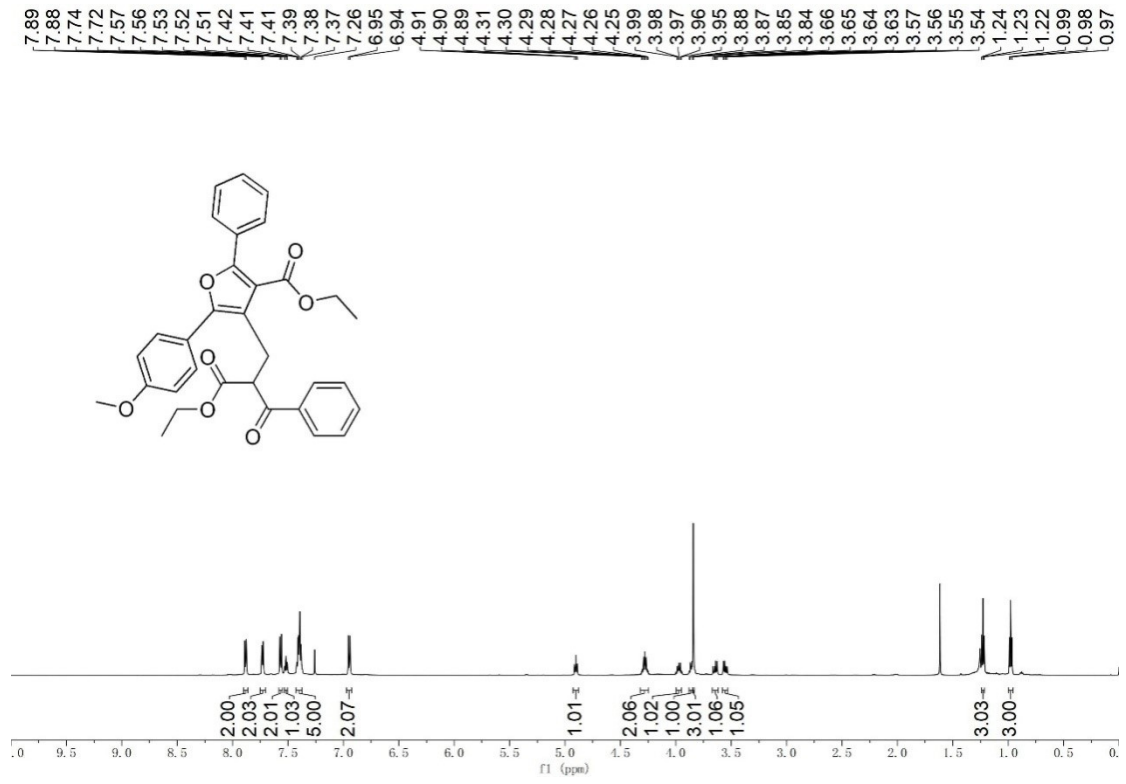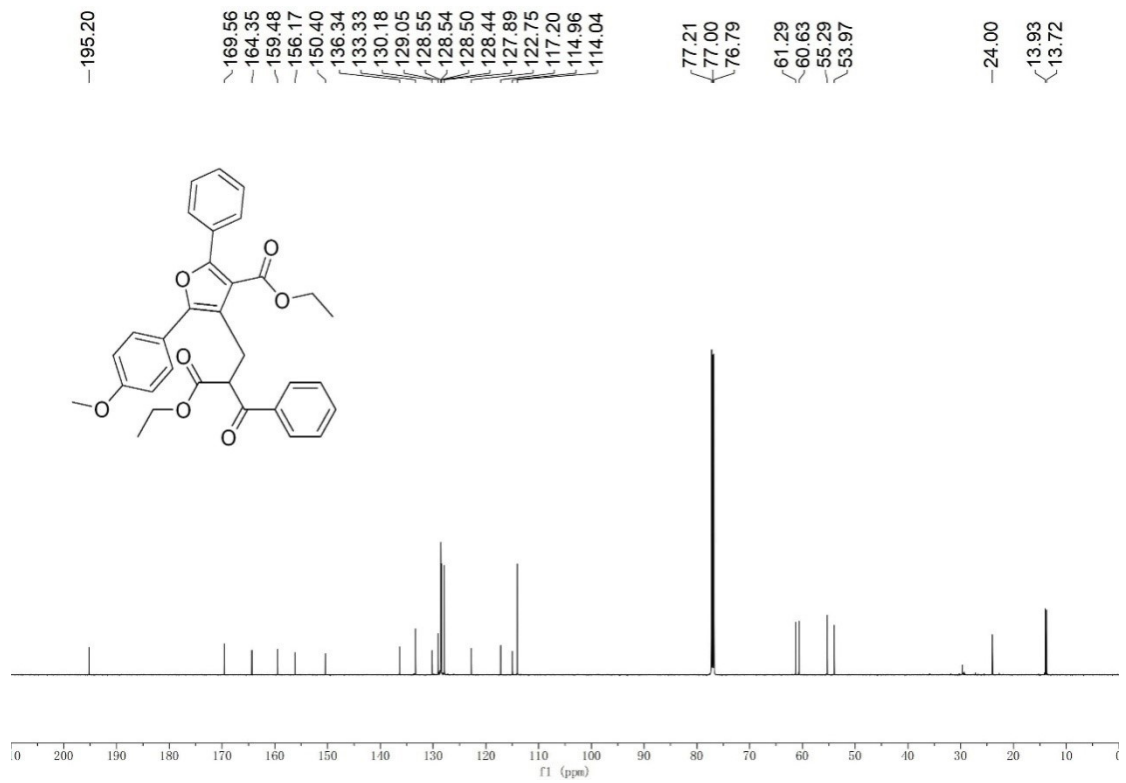

**Ethyl 4-(3-ethoxy-2-(4-fluorobenzoyl)-3-oxopropyl)-2-(4-fluorophenyl)-5-(4-methoxyphenyl)furan-3-carboxylate (3ea)**

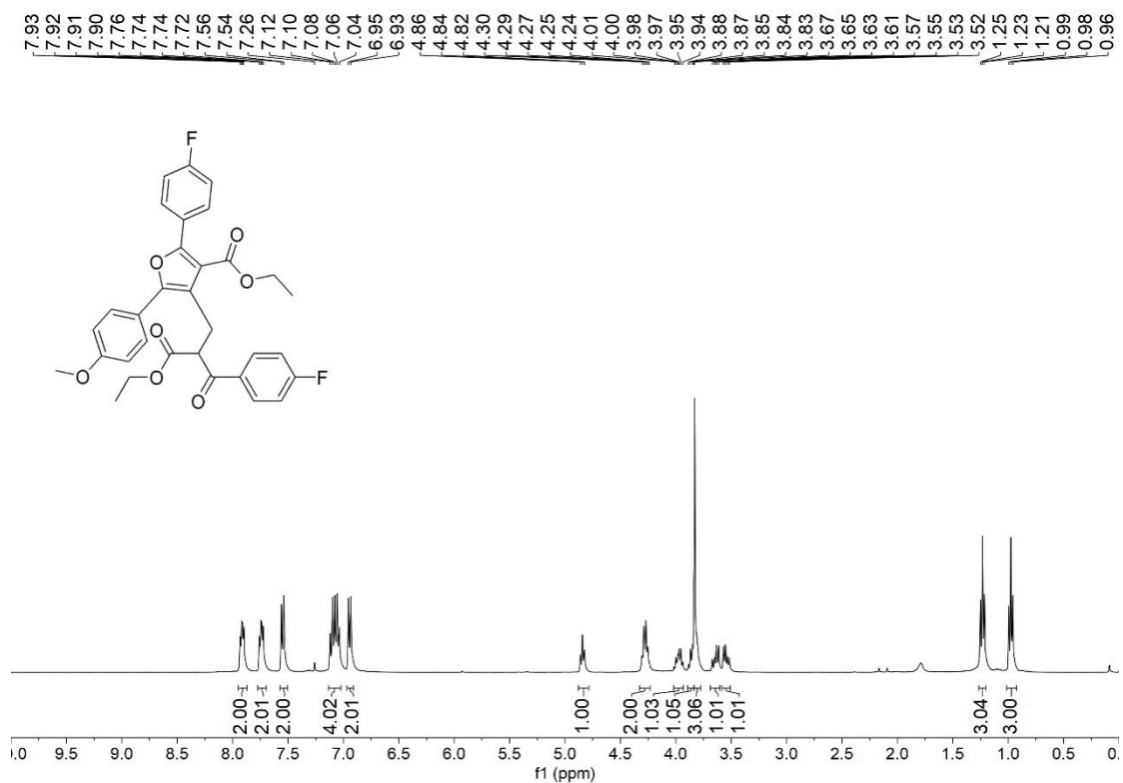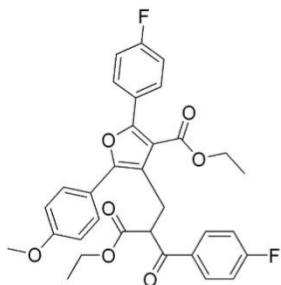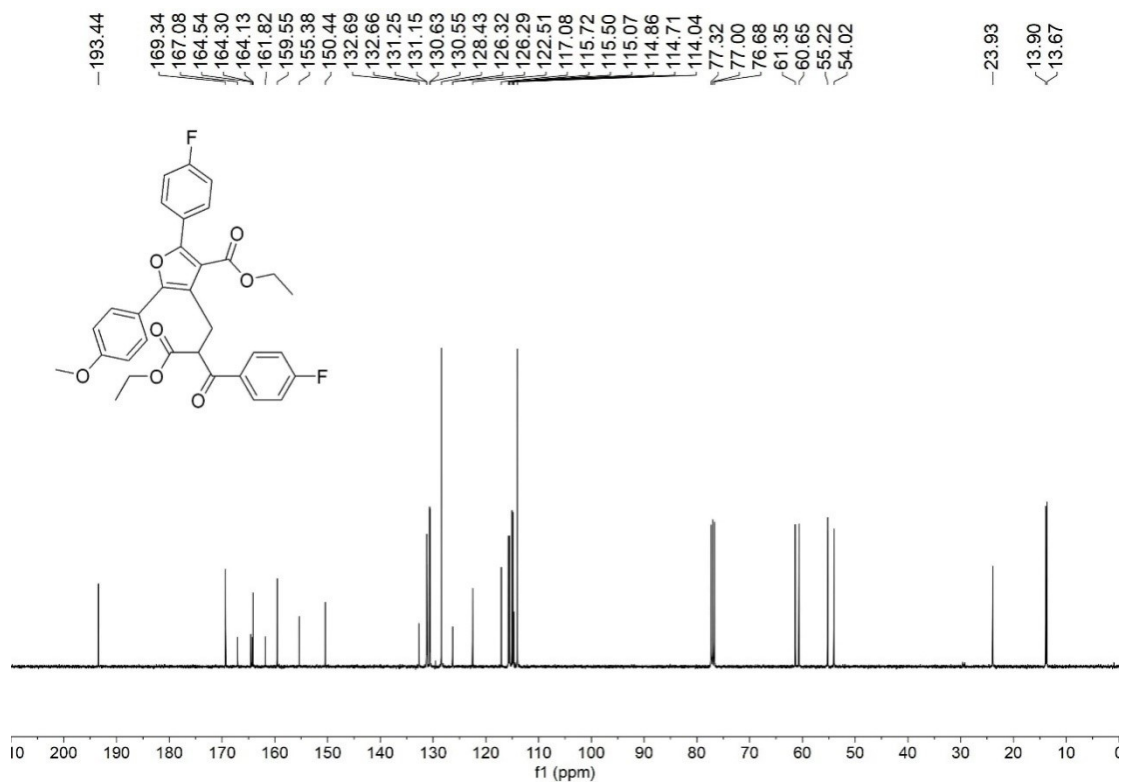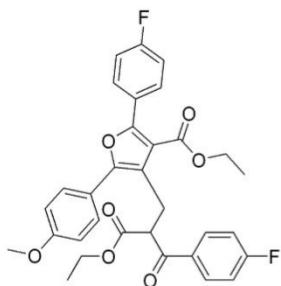

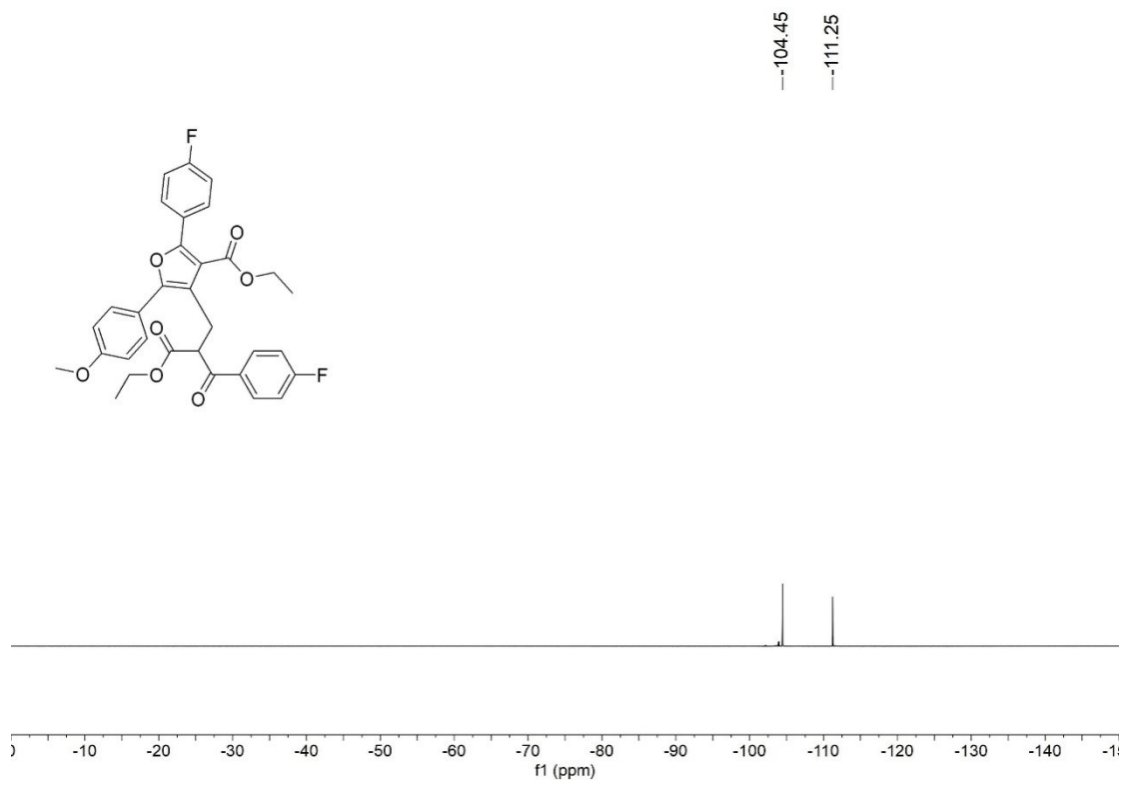

ethyl 4-(2-(4-chlorobenzoyl)-3-ethoxy-3-oxopropyl)-2-(4-chlorophenyl)-5-(4-methoxyphenyl)furan-3-carboxylate (3fa)

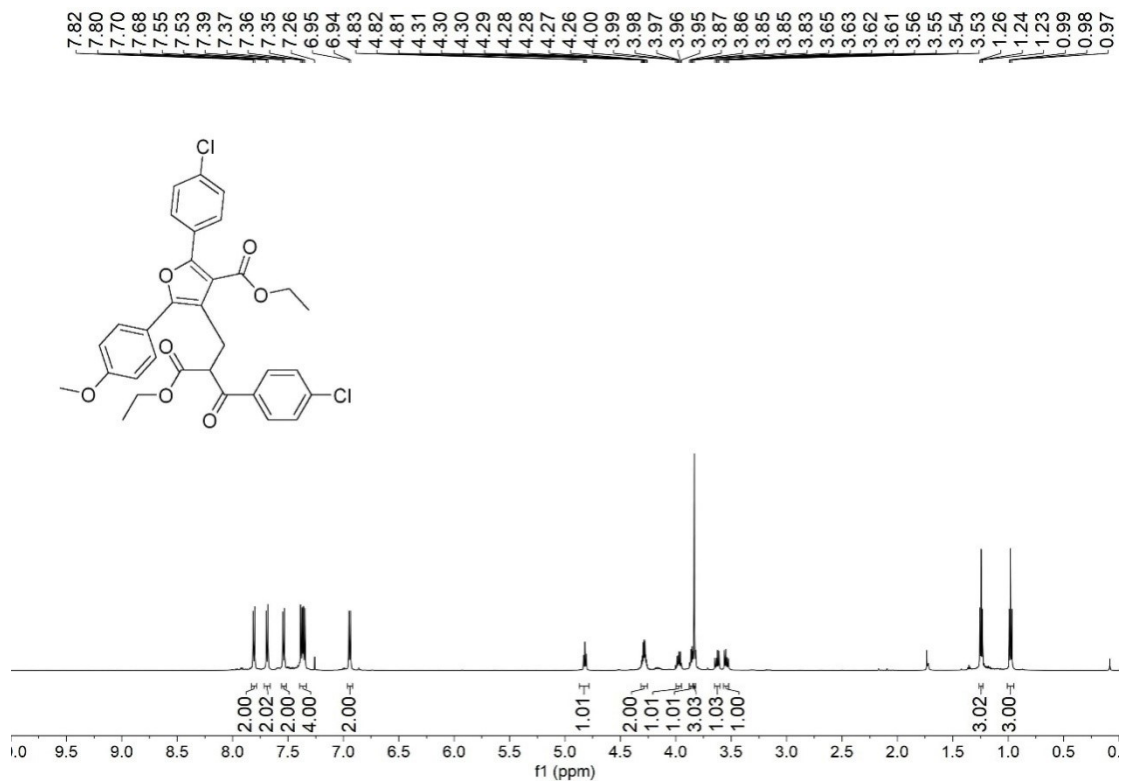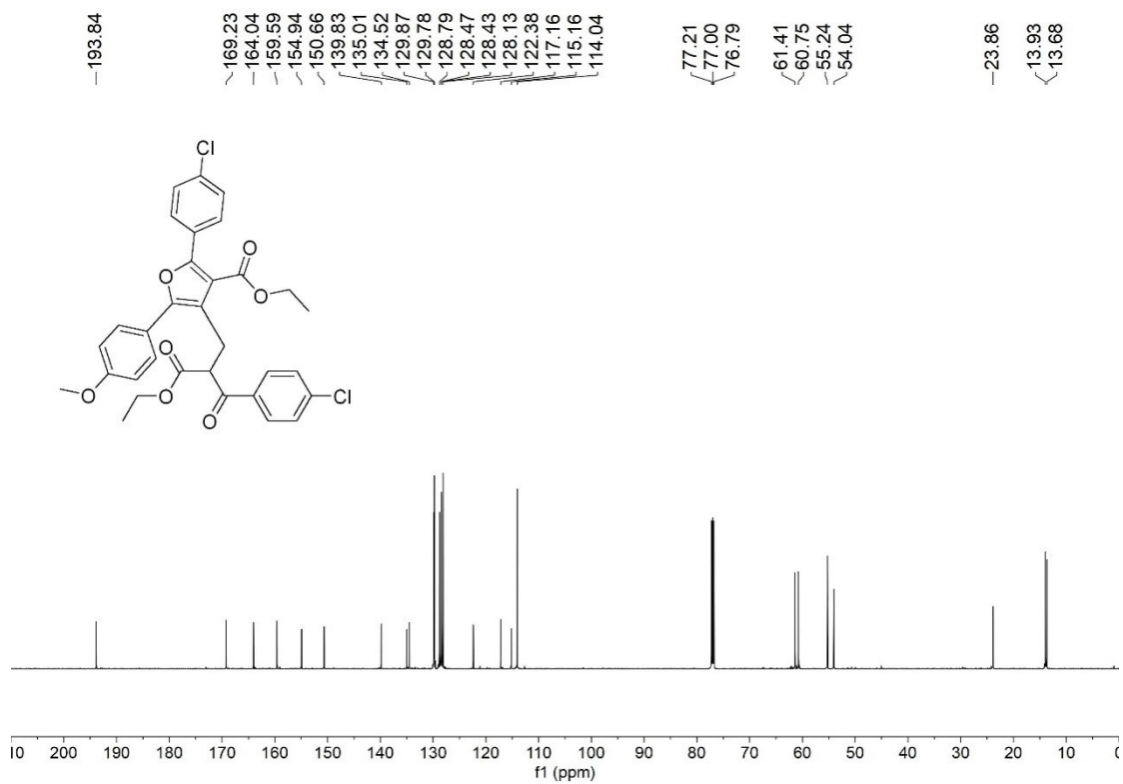

ethyl 4-(2-(4-bromobenzoyl)-3-ethoxy-3-oxopropyl)-2-(4-bromophenyl)-5-(4-methoxyphenyl)furan-3-carboxylate (3ga)

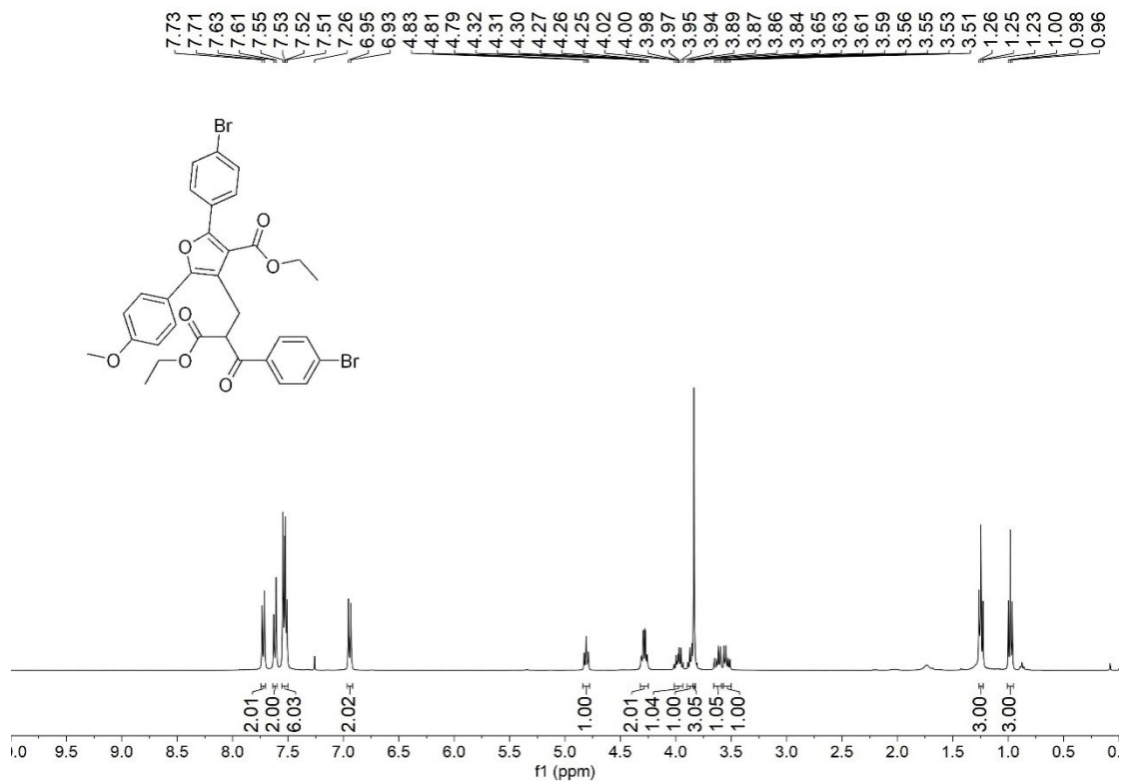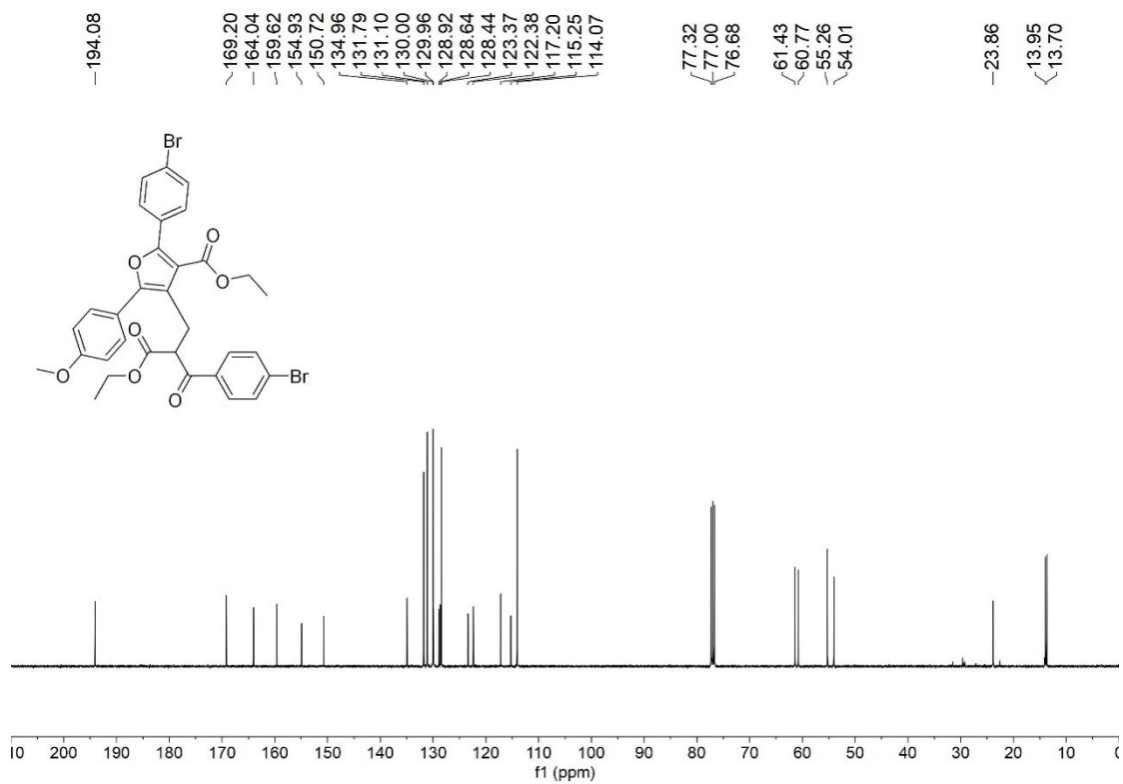



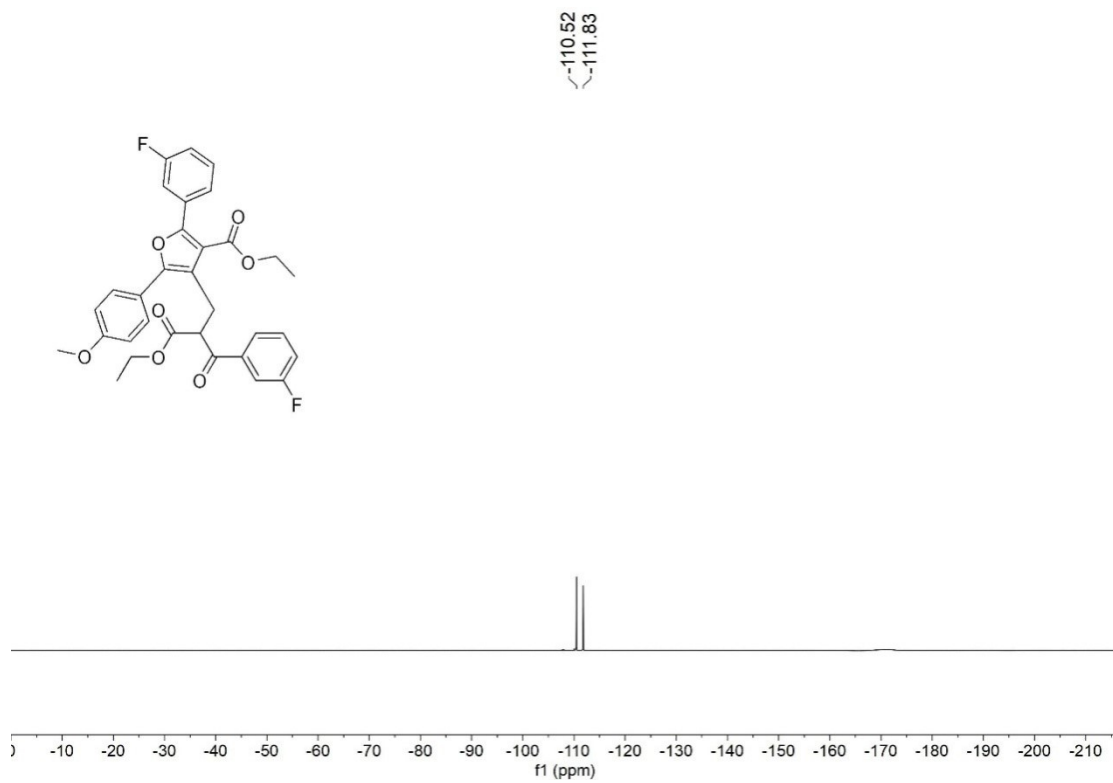

ethyl 4-(3-ethoxy-2-(2-fluorobenzoyl)-3-oxopropyl)-2-(2-fluorophenyl)-5-(4-methoxyphenyl)furan-3-carboxylate (3ia)

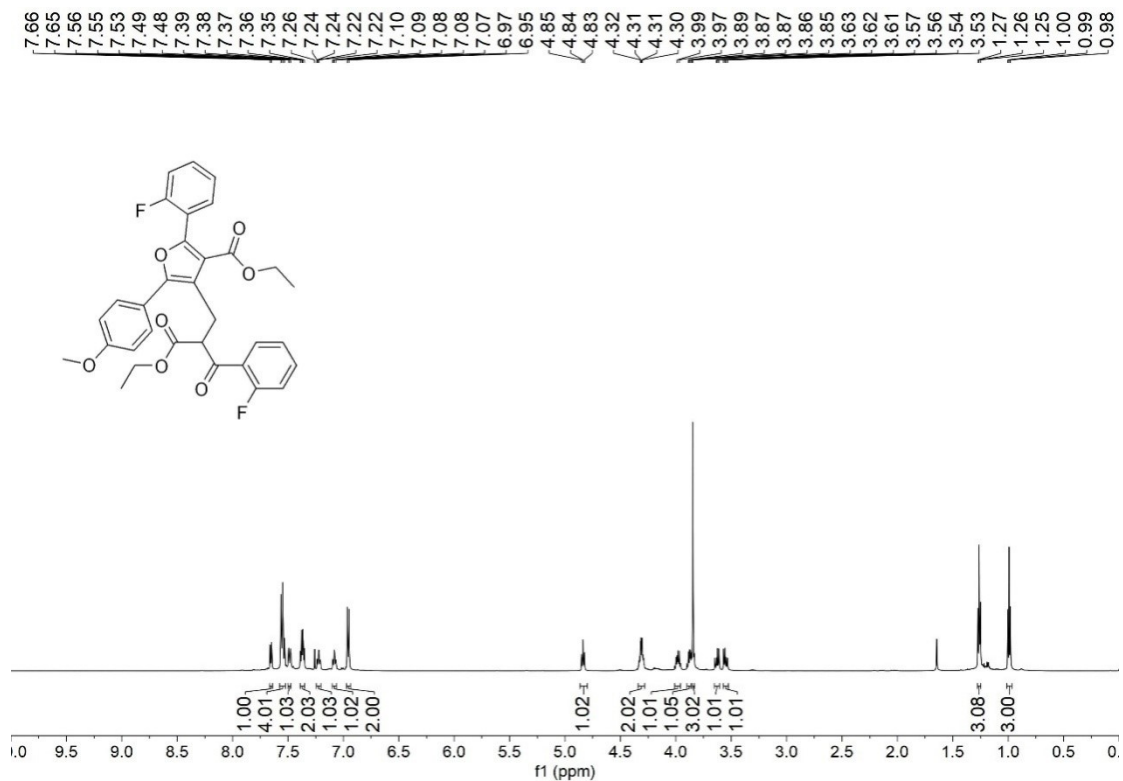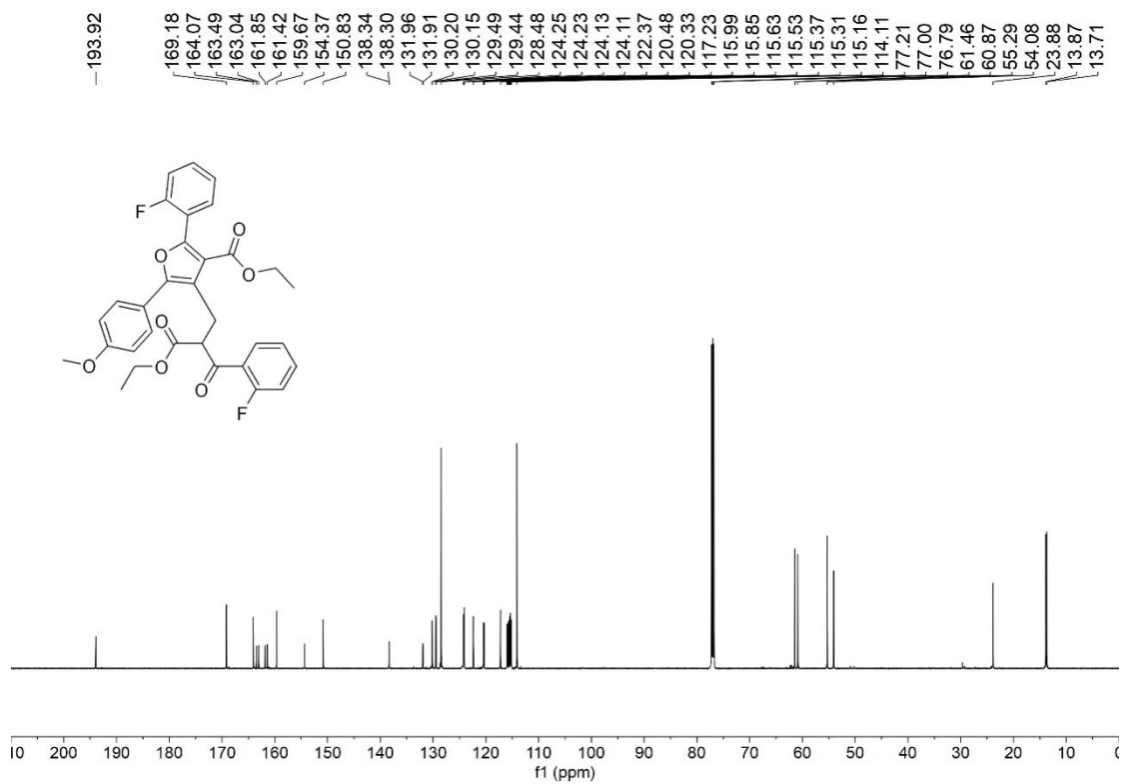



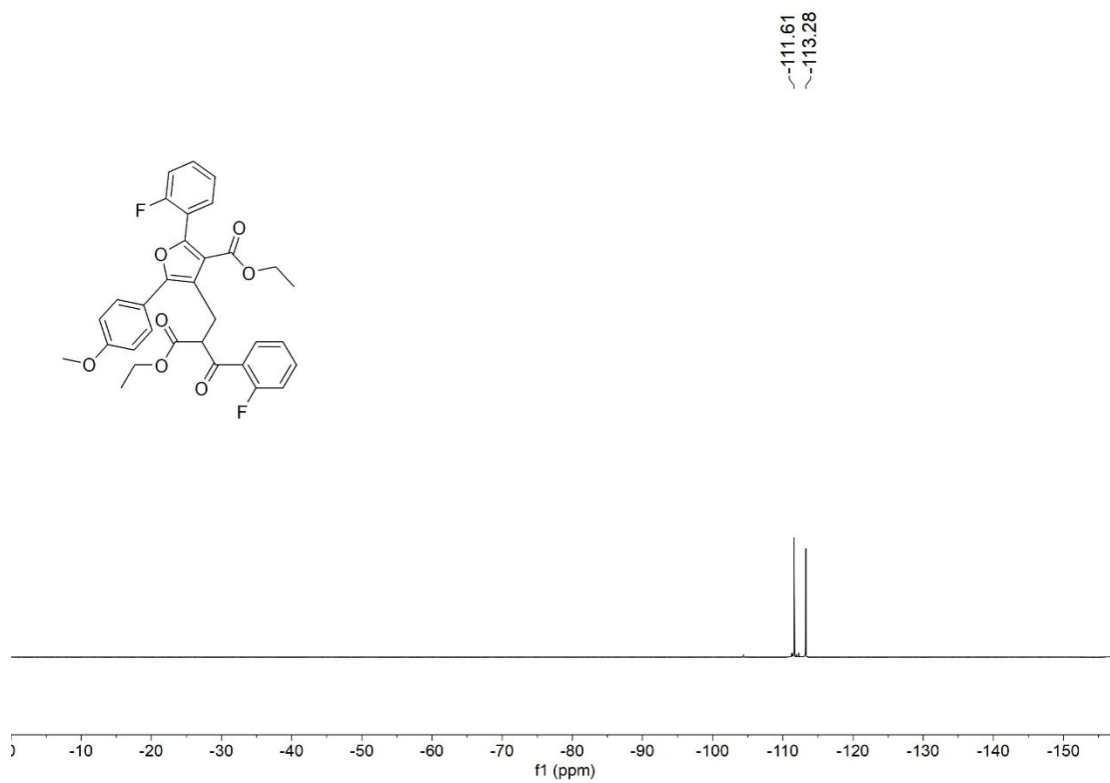

ethyl 4-(3-ethoxy-3-oxo-2-(4-(trifluoromethyl)benzoyl)propyl)-5-(4-methoxyphenyl)-2-(4-(trifluoromethyl)phenyl)furan-3-carboxylate (3ja)

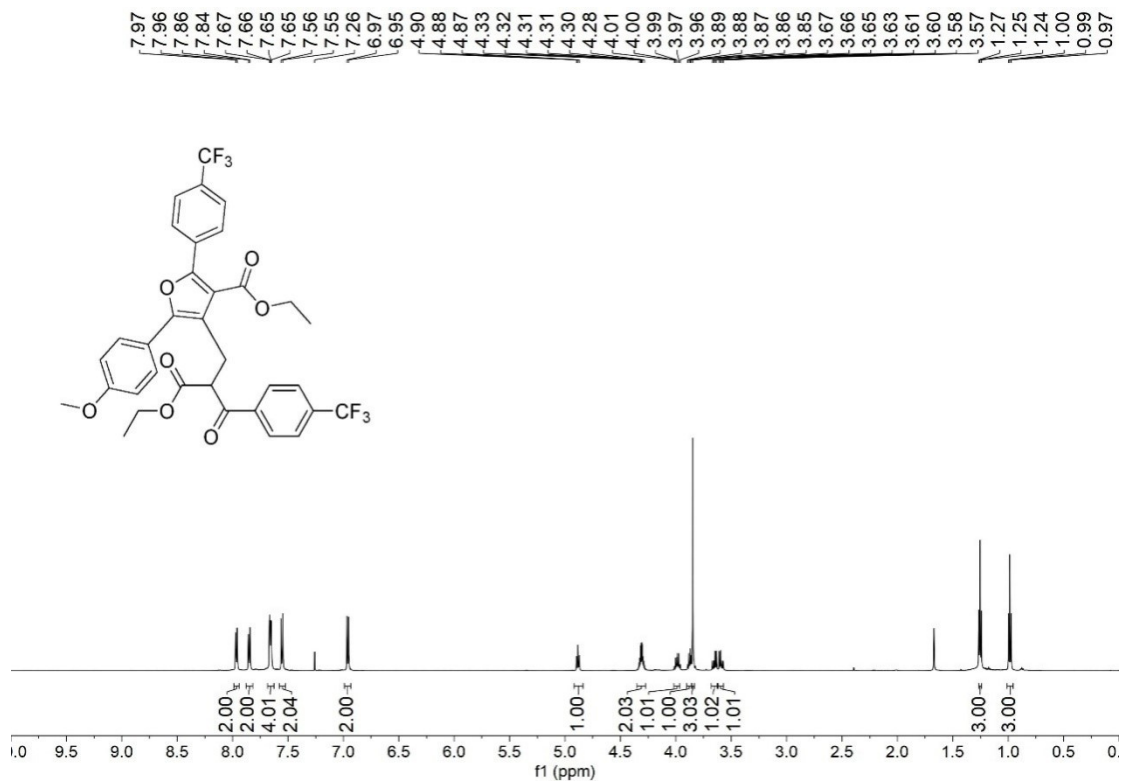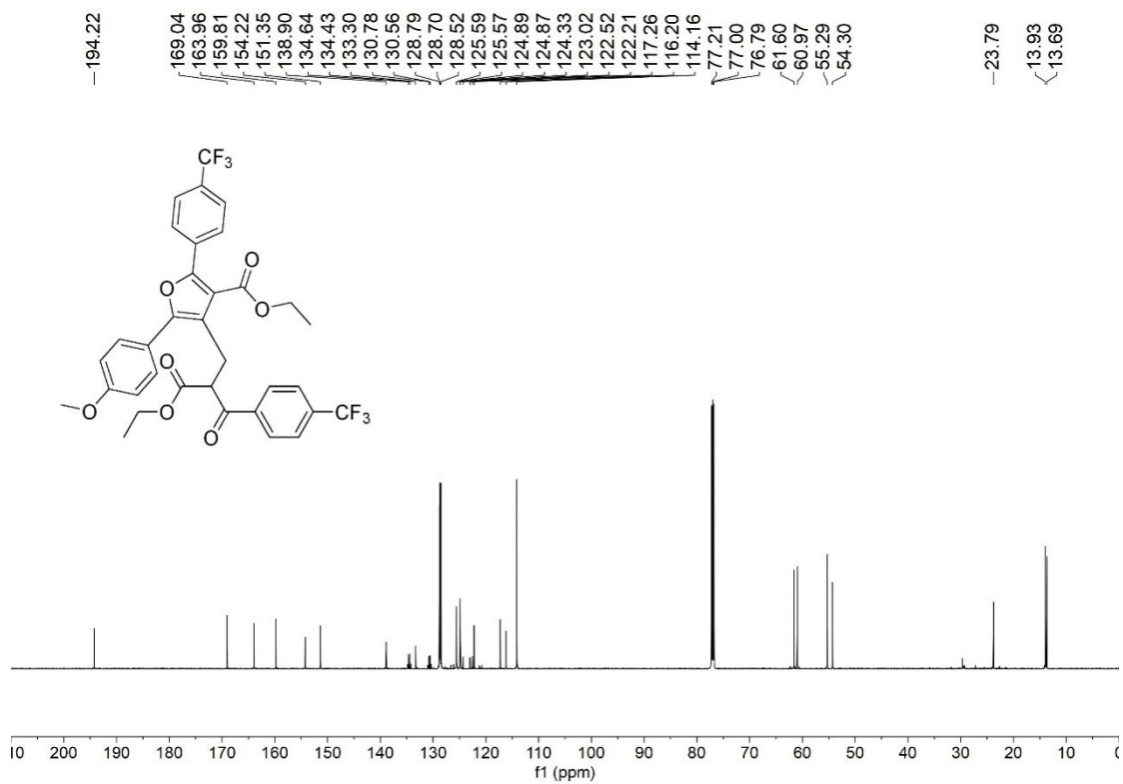

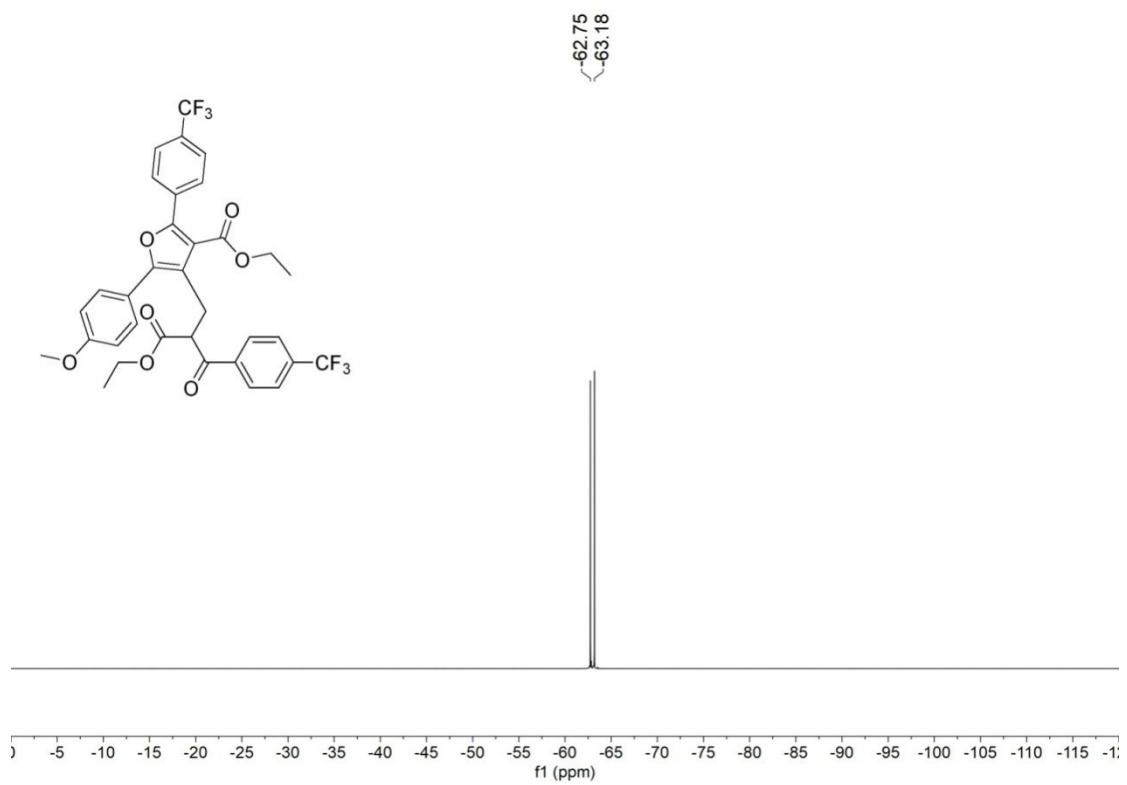

ethyl 4-(2-(4-cyanobenzoyl)-3-ethoxy-3-oxopropyl)-2-(4-cyanophenyl)-5-(4-methoxyphenyl)furan-3-carboxylate (3ka)

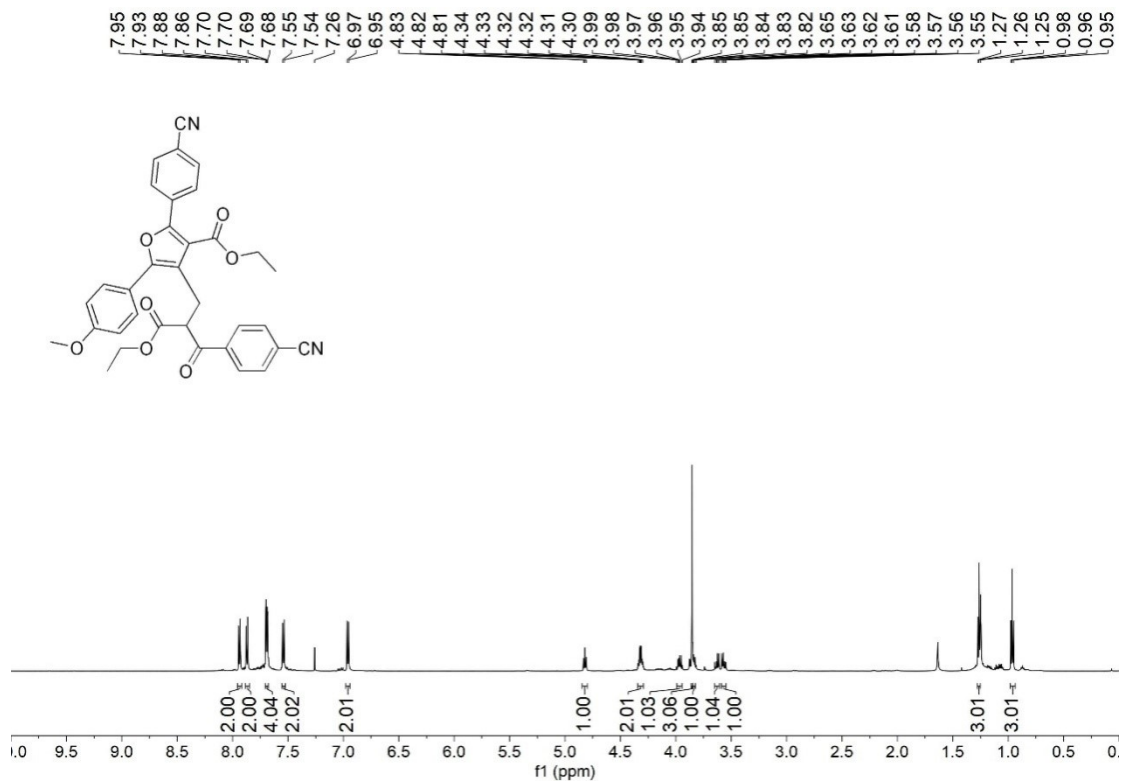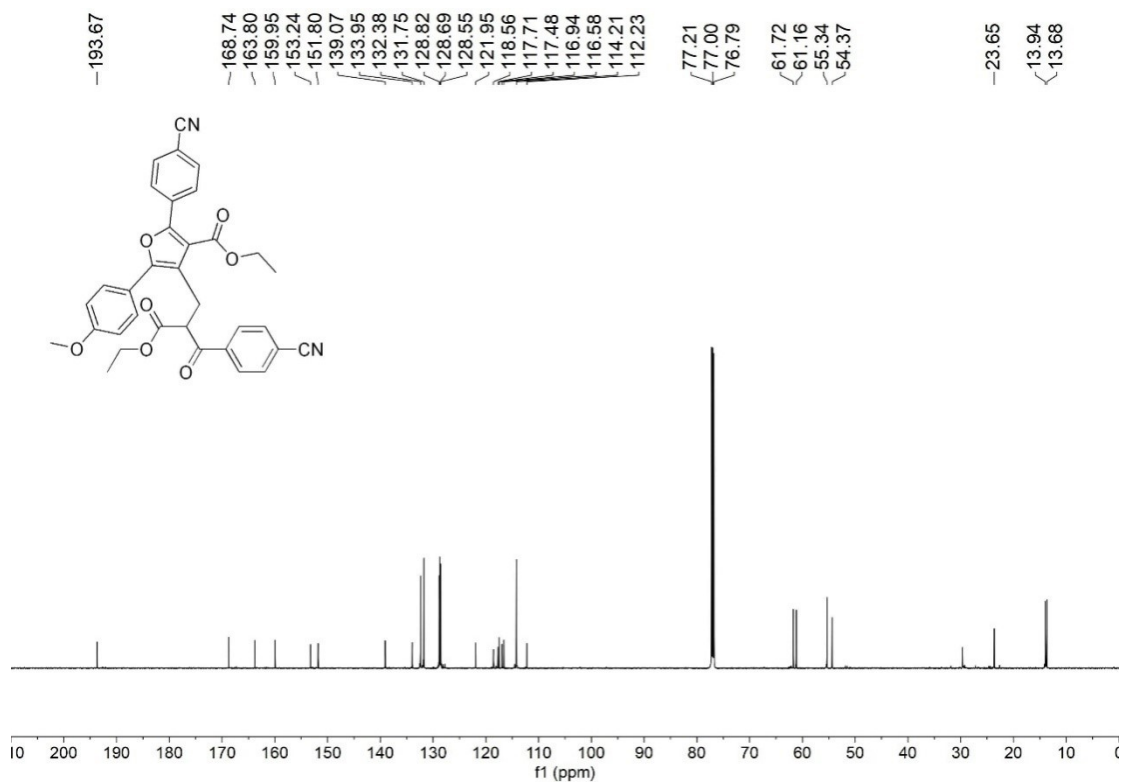

ethyl 4-(2-(2-naphthoyl)-3-ethoxy-3-oxopropyl)-5-(4-methoxyphenyl)-2-(naphthalen-1-

yl)furan-3-carboxylate (31a)

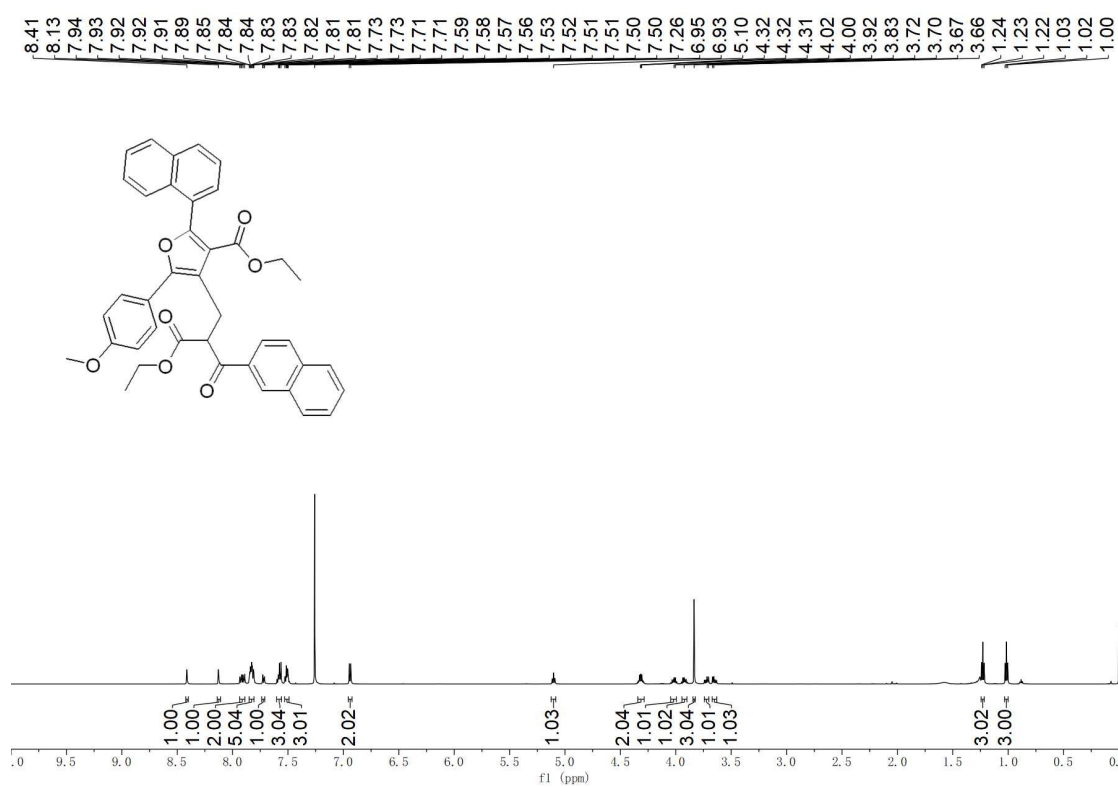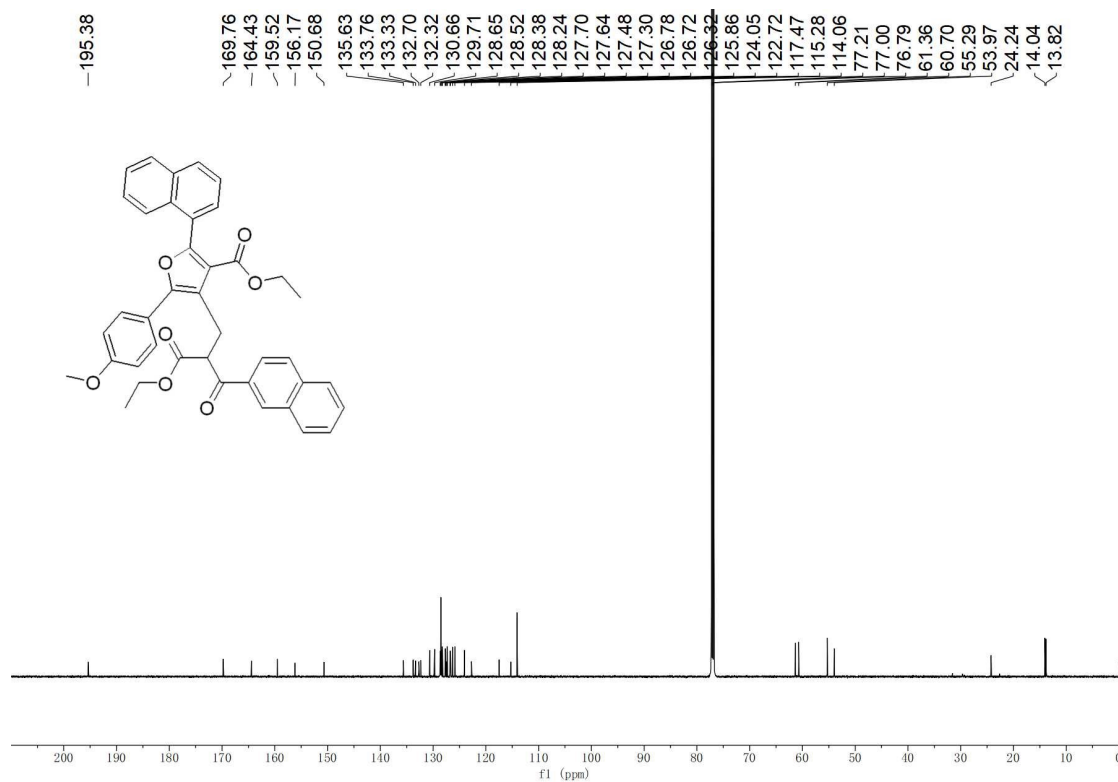

**ethyl 4-(3-ethoxy-3-oxo-2-(thiophene-2-carbonyl)propyl)-5-(4-methoxyphenyl)-2-(thiophen-2-yl)furan-3-carboxylate (3ma)**

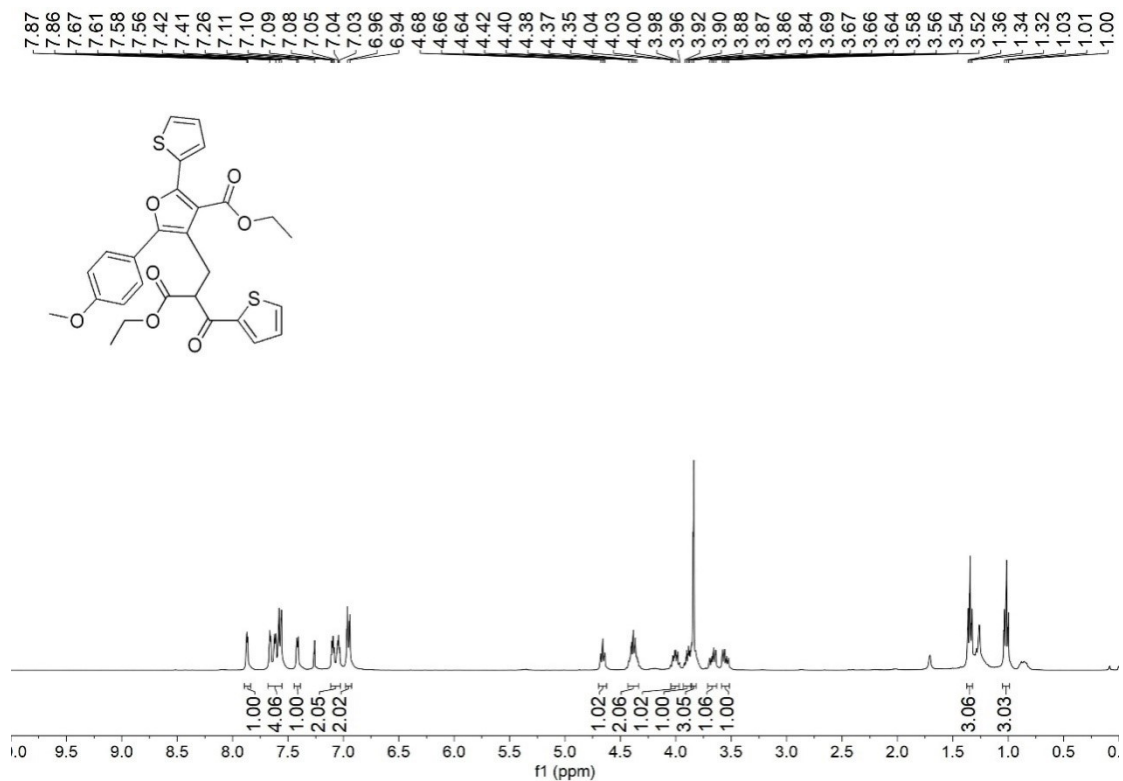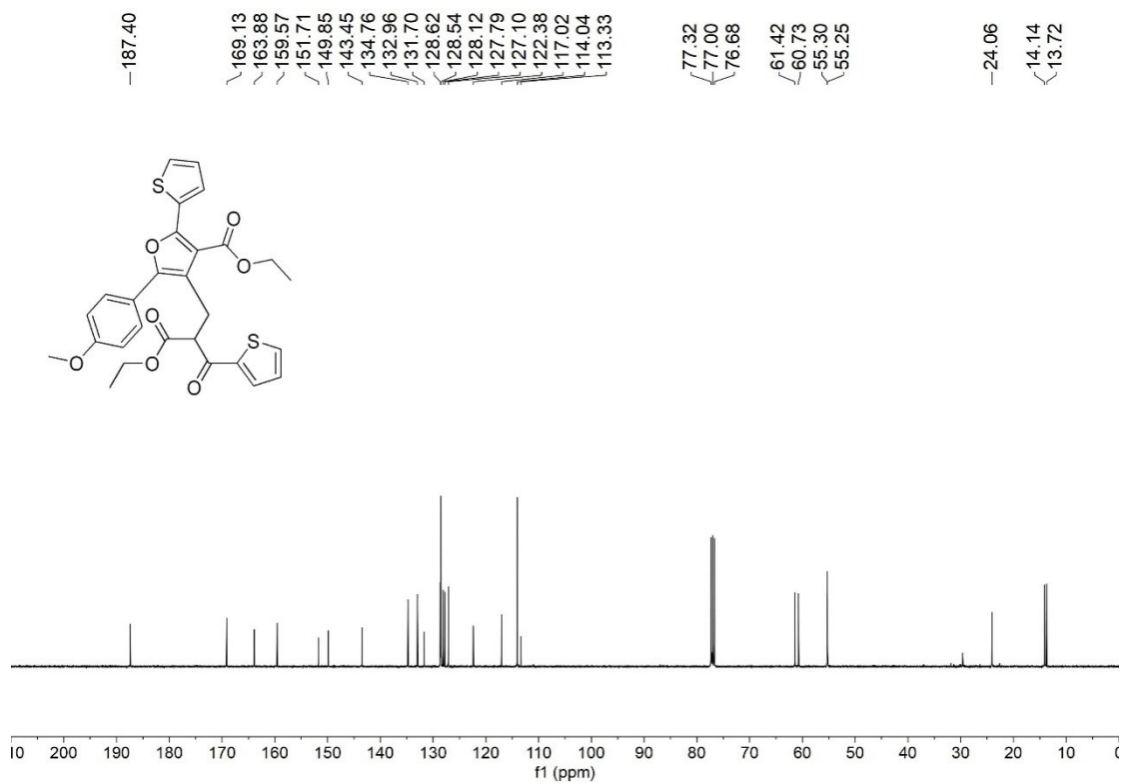

**Ethyl 4-(2-(ethoxycarbonyl)-3-oxobutyl)-5-(4-methoxyphenyl)-2-methylfuran-3-carboxylate  
(3na)**

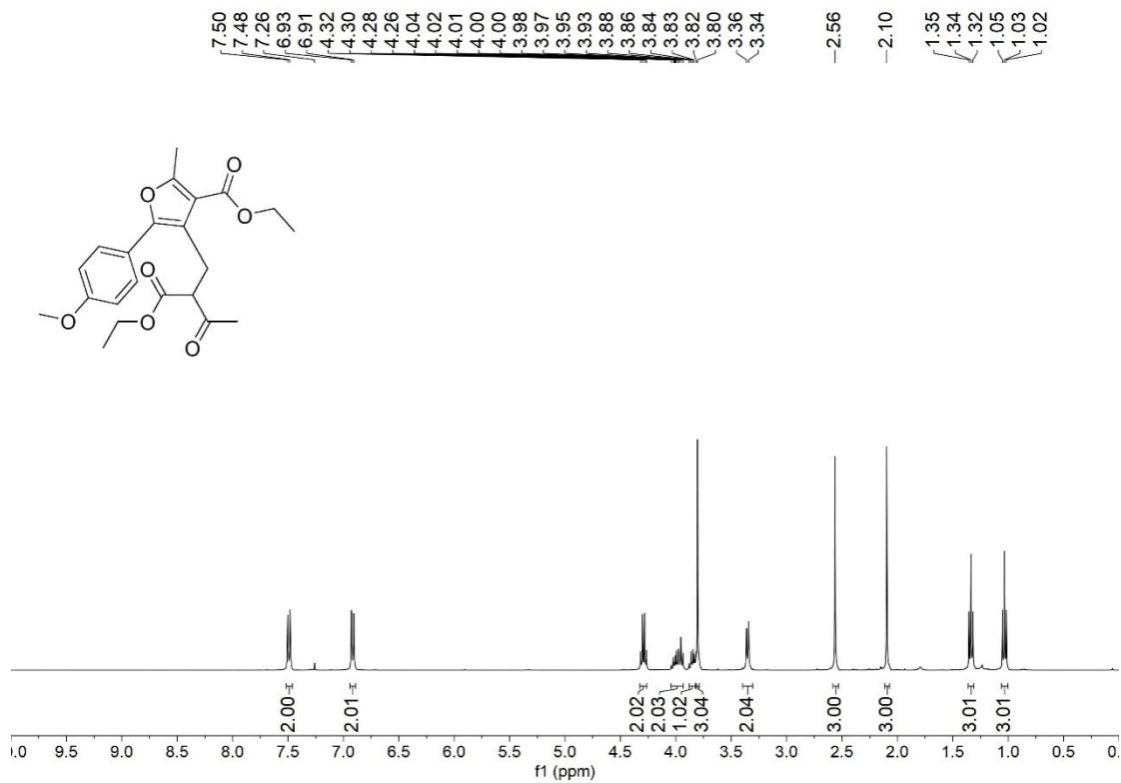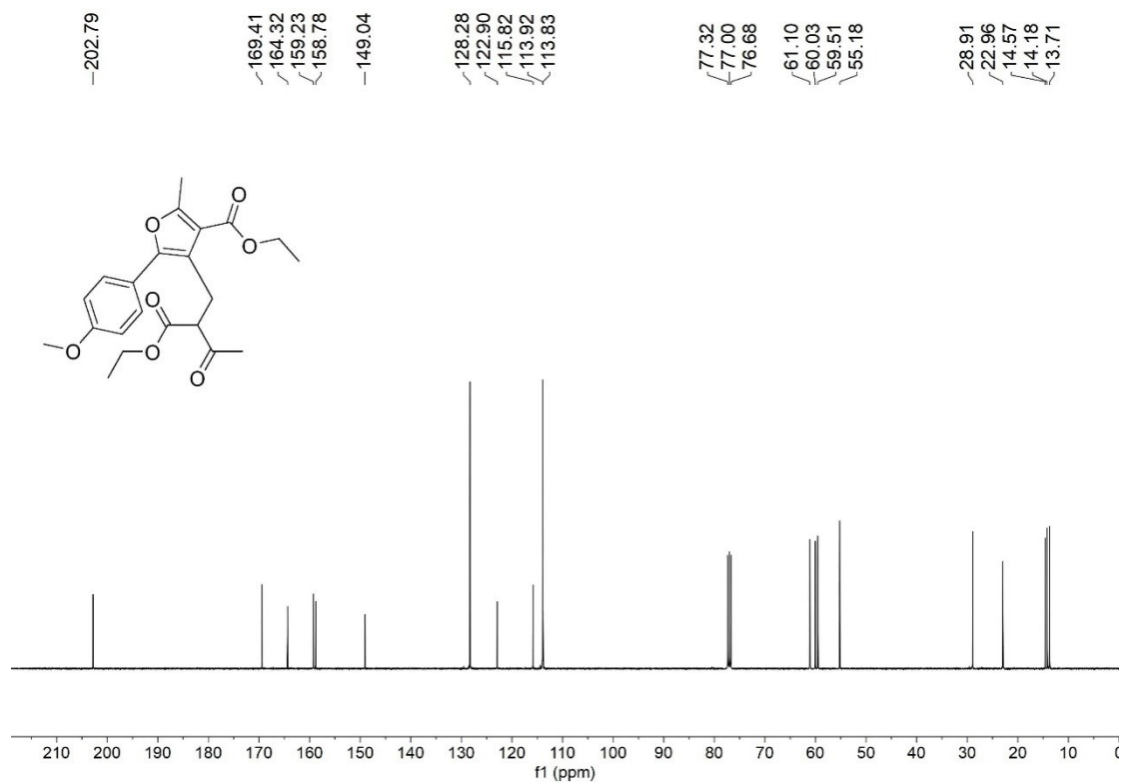

**ethyl 2-butyl-4-(2-(ethoxycarbonyl)-3-oxoheptyl)-5-(4-methoxyphenyl)furan-3-carboxylate (30a)**

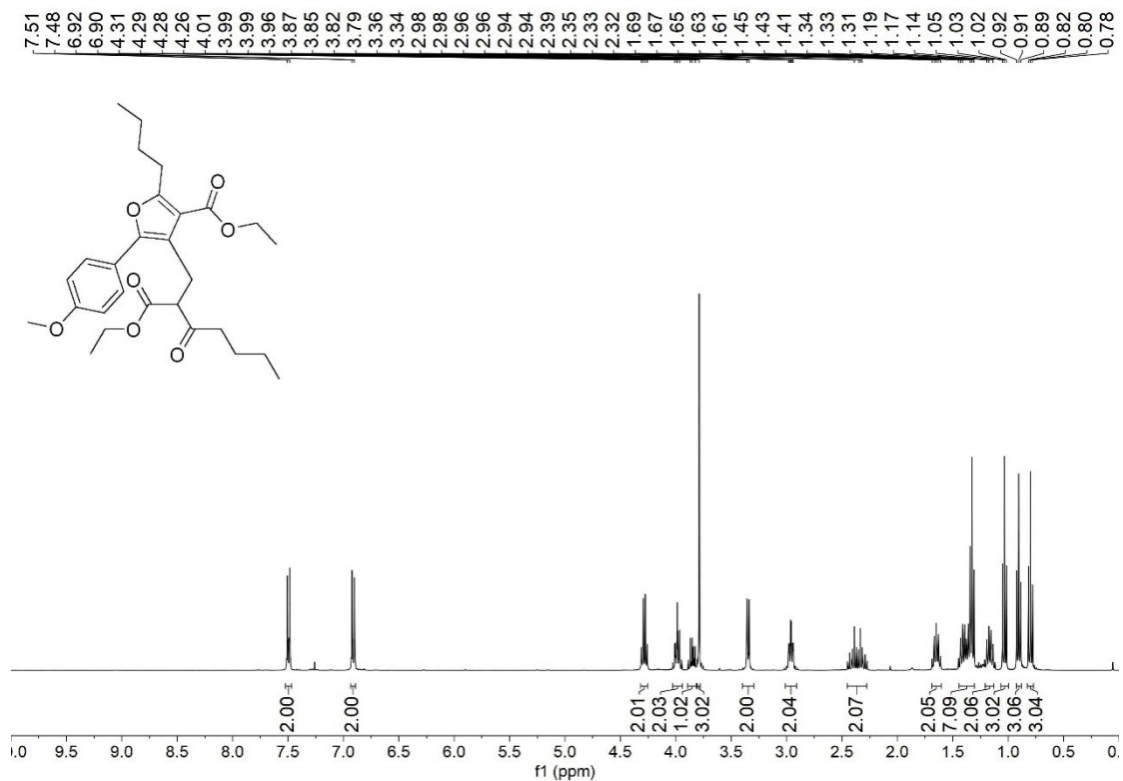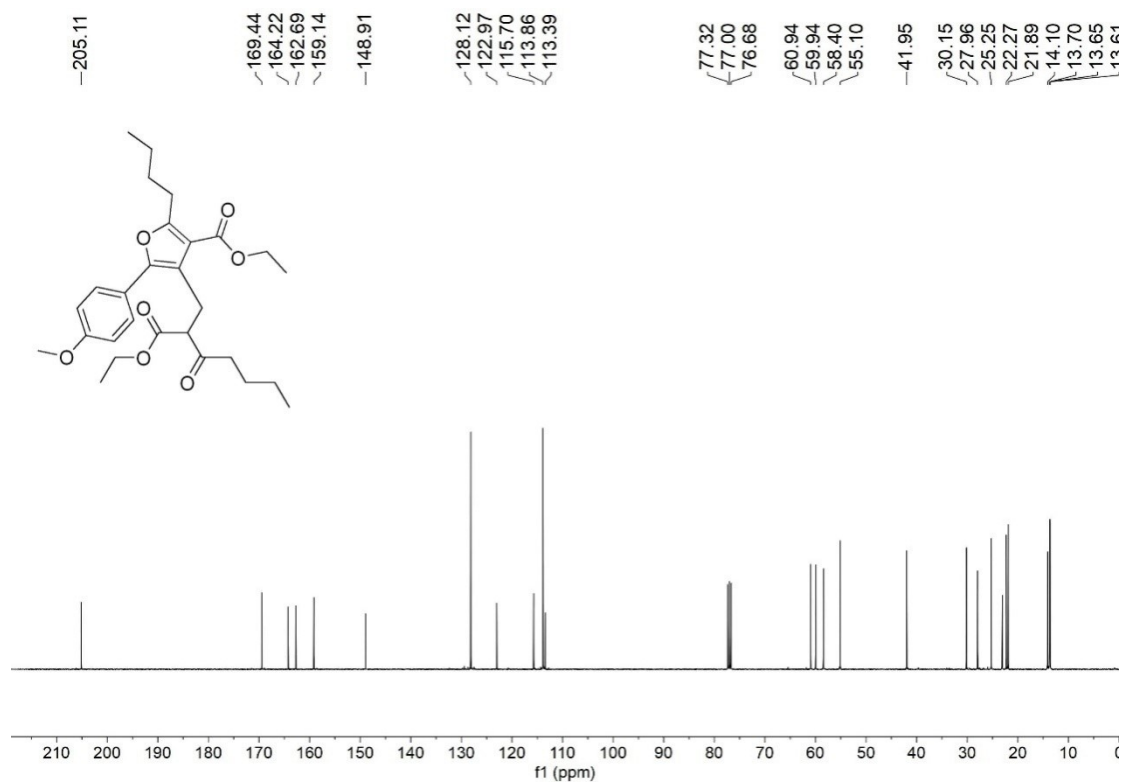



ethyl 2-(*tert*-butyl)-4-(2-(ethoxycarbonyl)-4,4-dimethyl-3-oxopentyl)-5-(4-methoxyphenyl)furan-3-carboxylate (3pa)

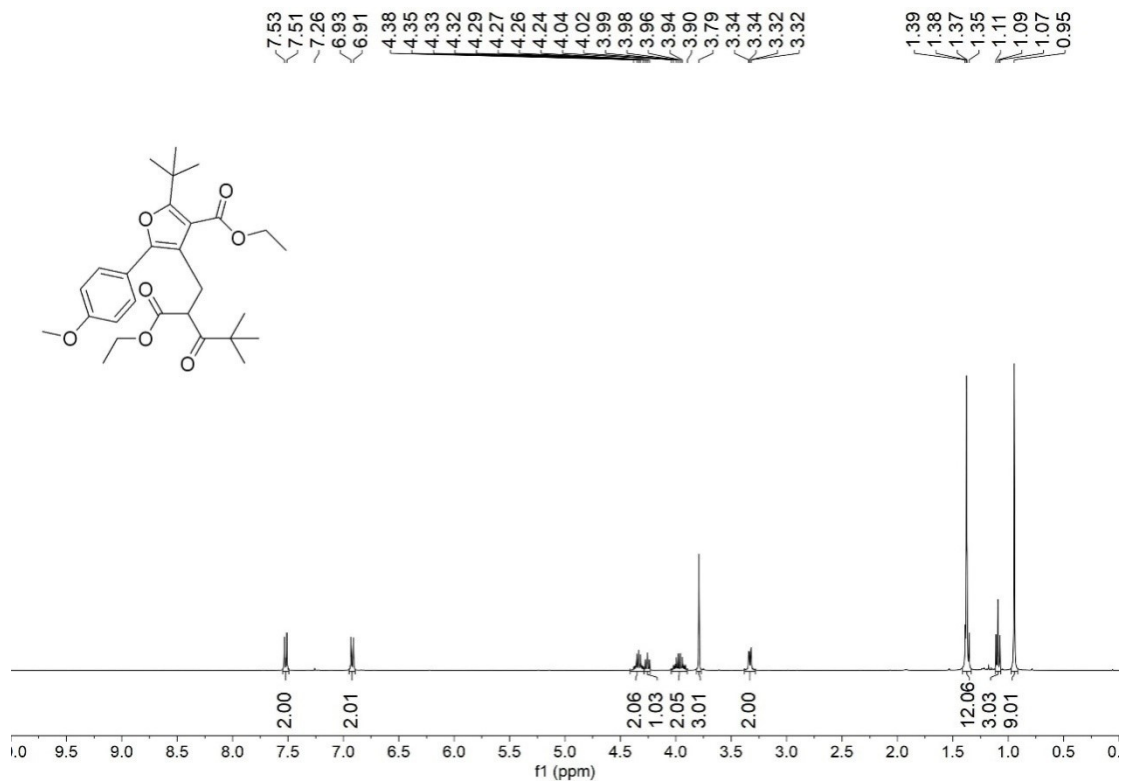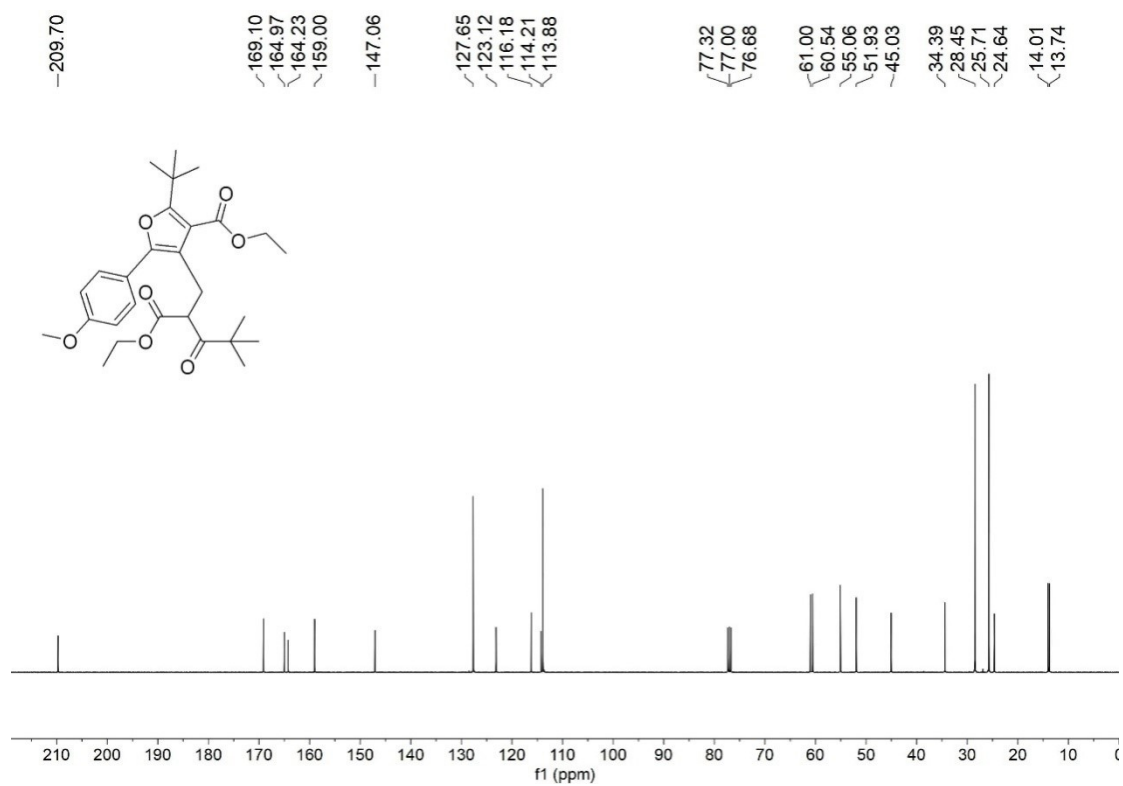

ethyl 4-(2-(cyclopropanecarbonyl)-3-ethoxy-3-oxopropyl)-2-cyclopropyl-5-(4-methoxyphenyl)furan-3-carboxylate (3qa)

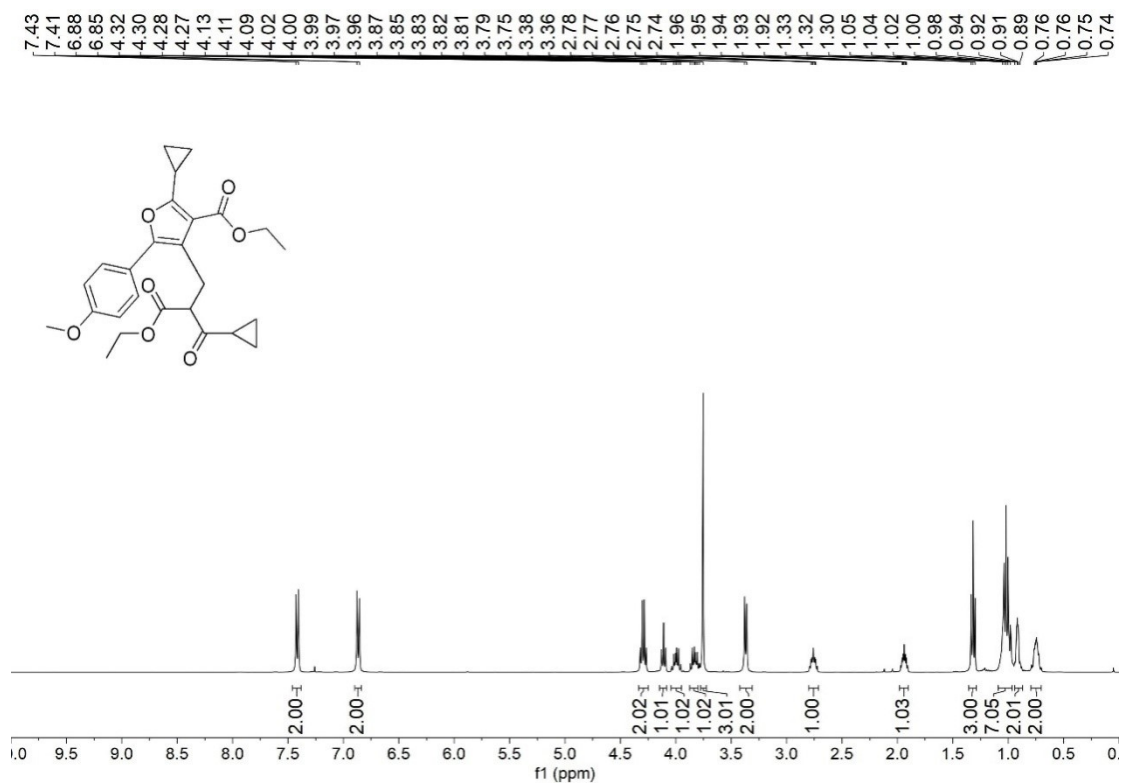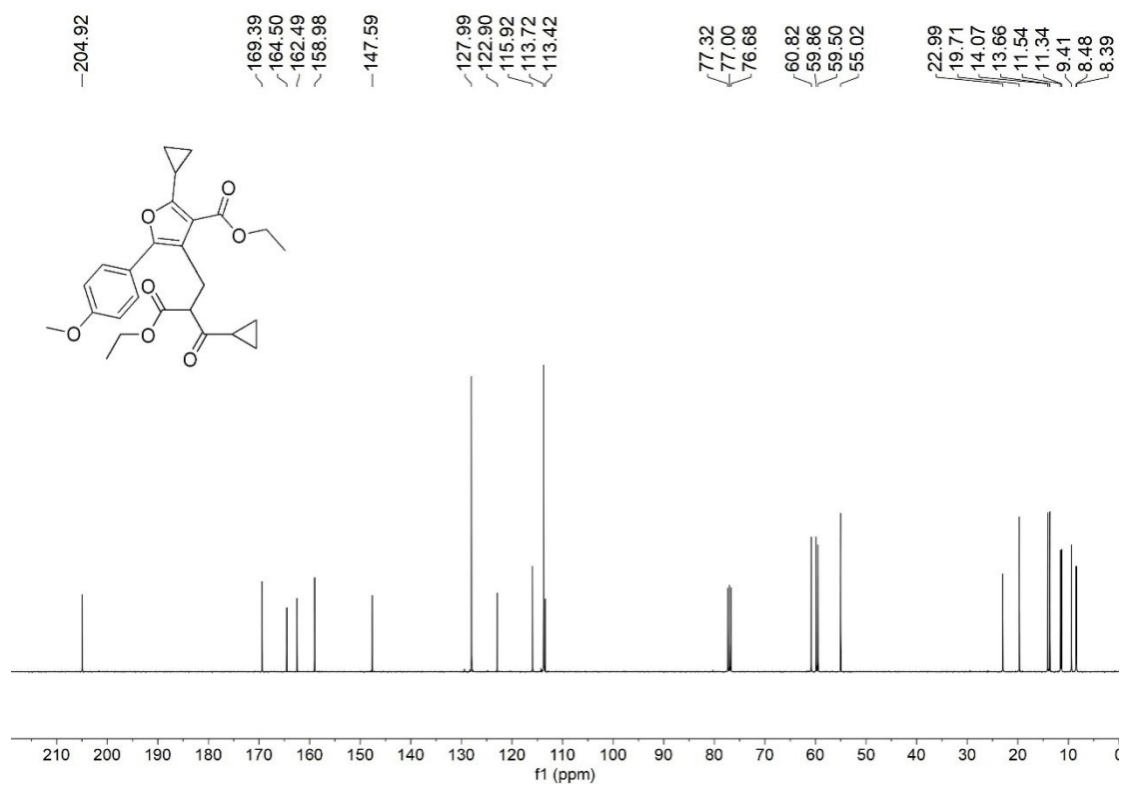

diethyl 2-((5-ethoxy-4-(ethoxycarbonyl)-2-(4-methoxyphenyl)furan-3-yl)methyl)malonate  
(3ra)

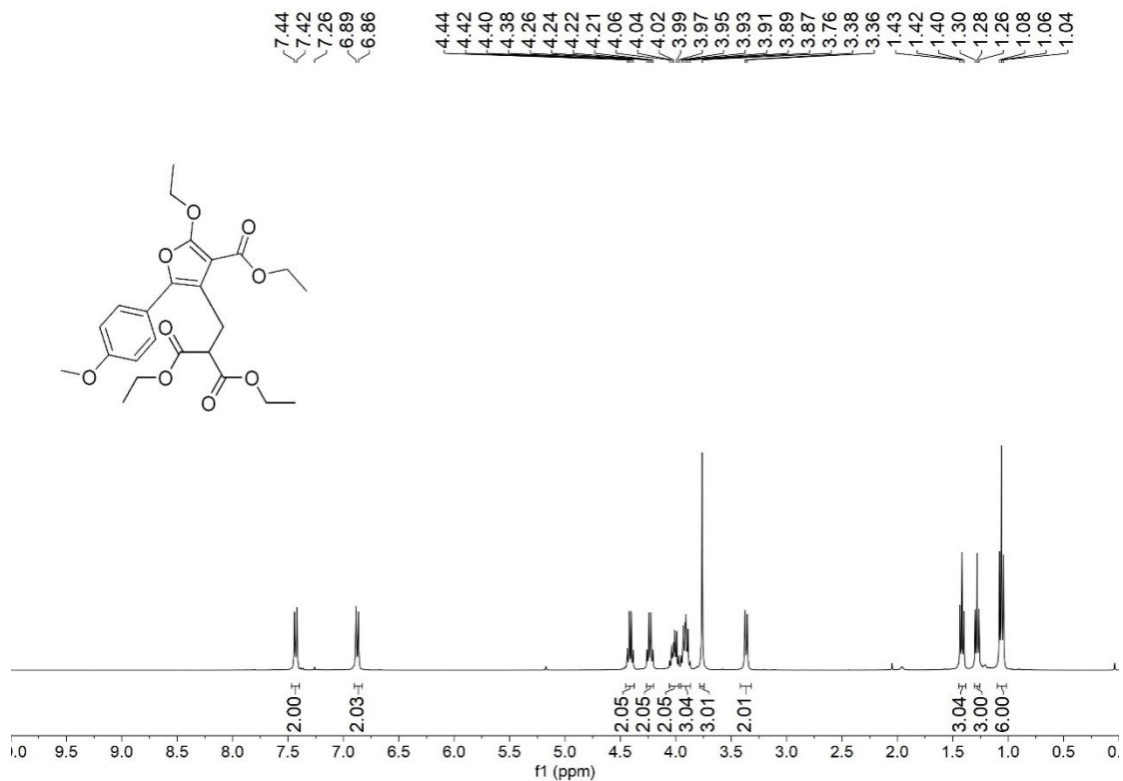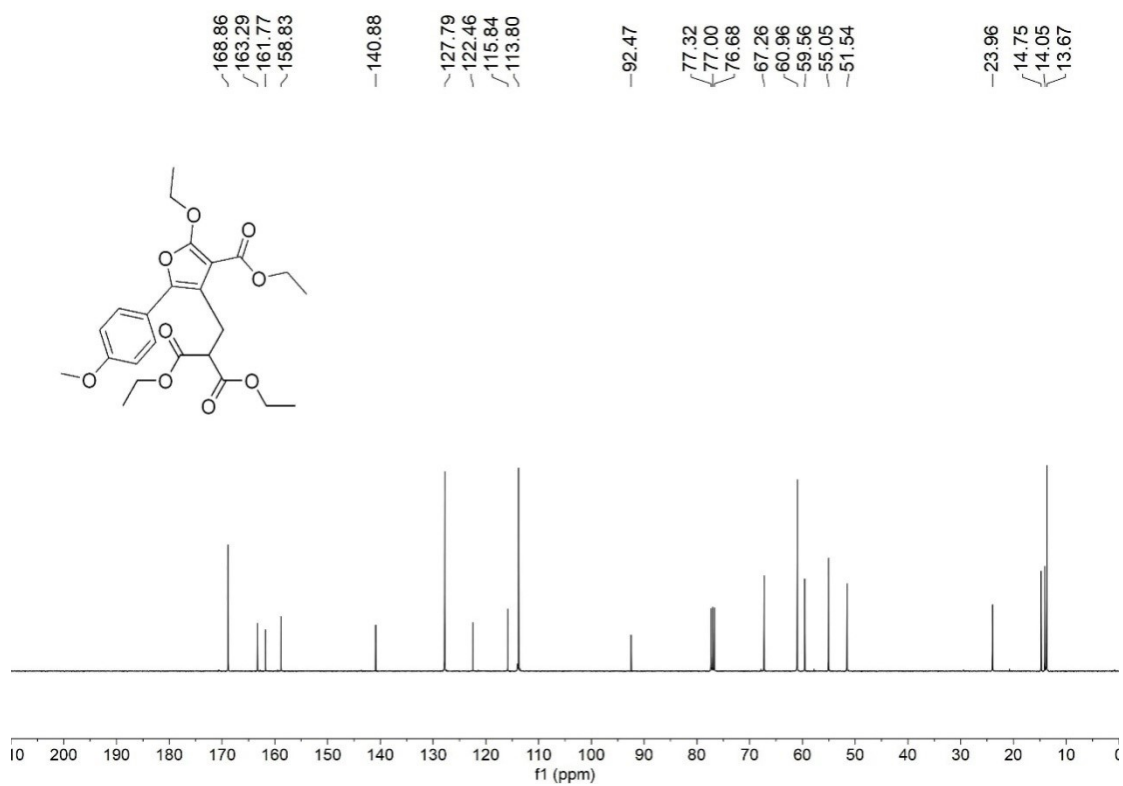

**4-(2-benzoyl-3-oxo-3-(phenylamino)propyl)-5-(4-methoxyphenyl)-N,2-diphenylfuran-3-carboxamide (3sa)**

9.15  
8.19  
7.99  
7.98  
7.71  
7.69  
7.61  
7.59  
7.57  
7.54  
7.52  
7.43  
7.41  
7.39  
7.36  
7.34  
7.26  
7.22  
7.20  
7.18  
7.16  
7.03  
7.01  
6.99  
6.92  
6.90  
5.11  
5.09  
5.07  
3.81  
3.73  
3.71  
3.69  
3.67  
3.44  
3.42  
3.40  
3.39

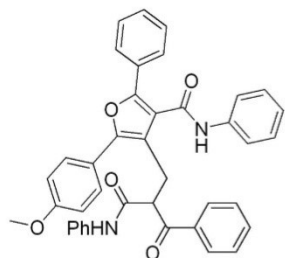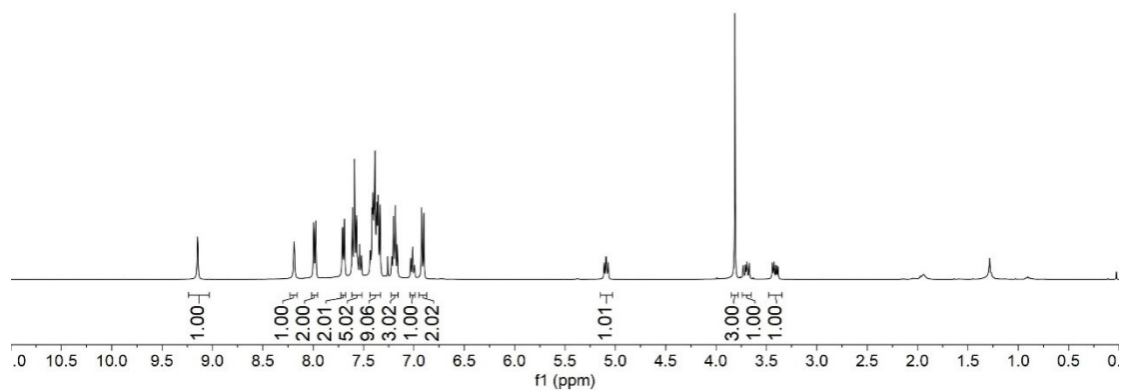

197.01  
166.92  
164.15  
159.59  
150.98  
150.33  
137.58  
137.51  
136.03  
133.73  
129.15  
129.12  
128.88  
128.87  
128.71  
128.67  
128.57  
126.55  
124.95  
124.13  
122.42  
120.10  
119.67  
116.44  
114.08  
77.32  
77.00  
76.68  
55.21  
55.03  
25.30

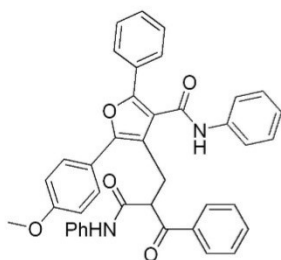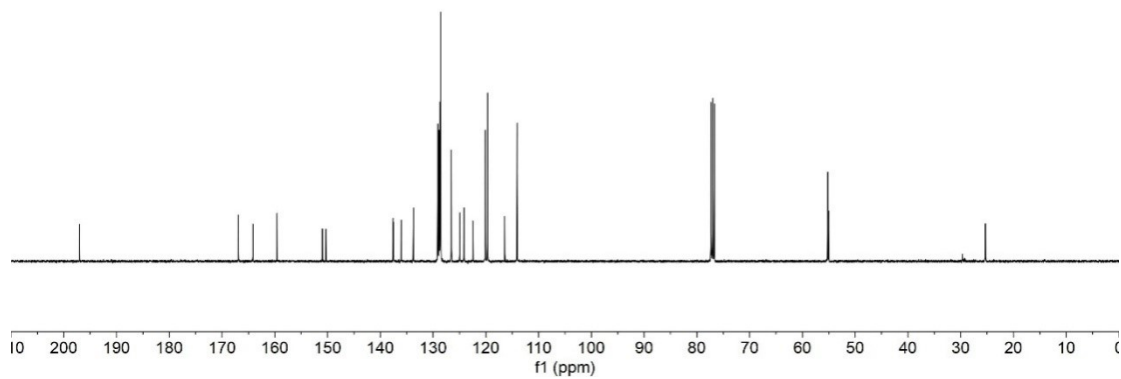

**4-(2-cyano-3-oxo-3-phenylpropyl)-5-(4-methoxyphenyl)-2-phenylfuran-3-carbonitrile (3ta)**

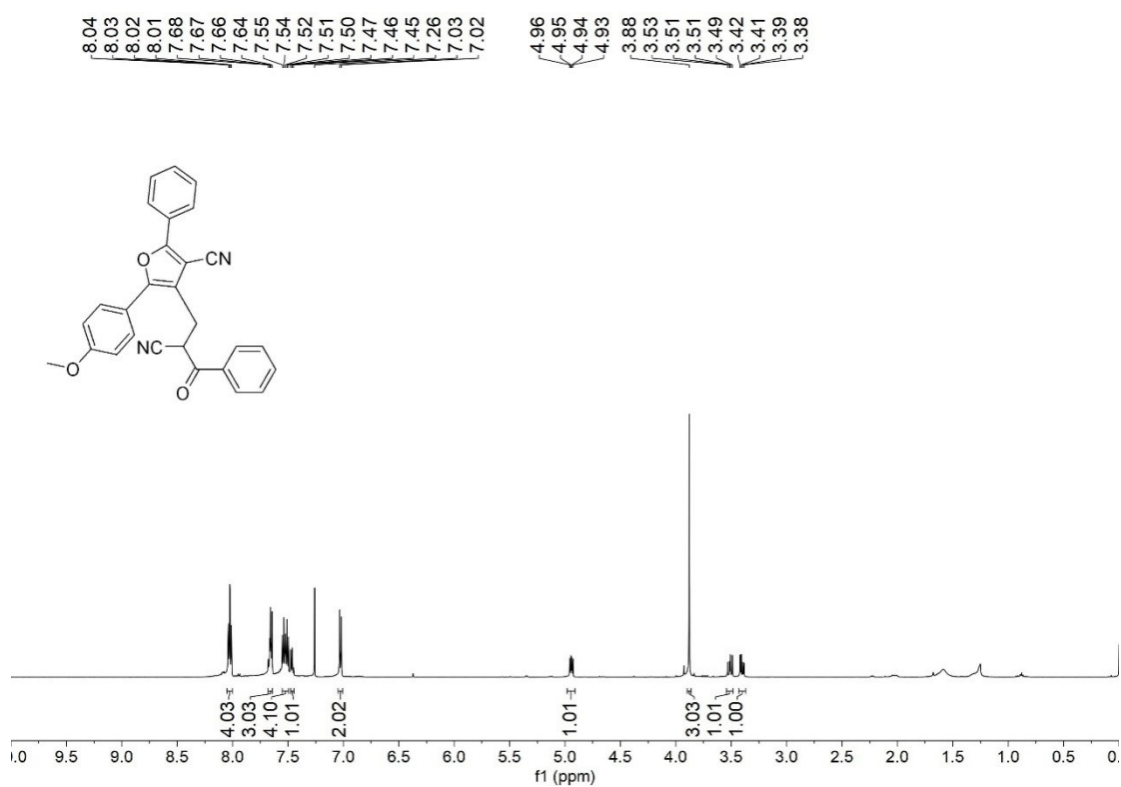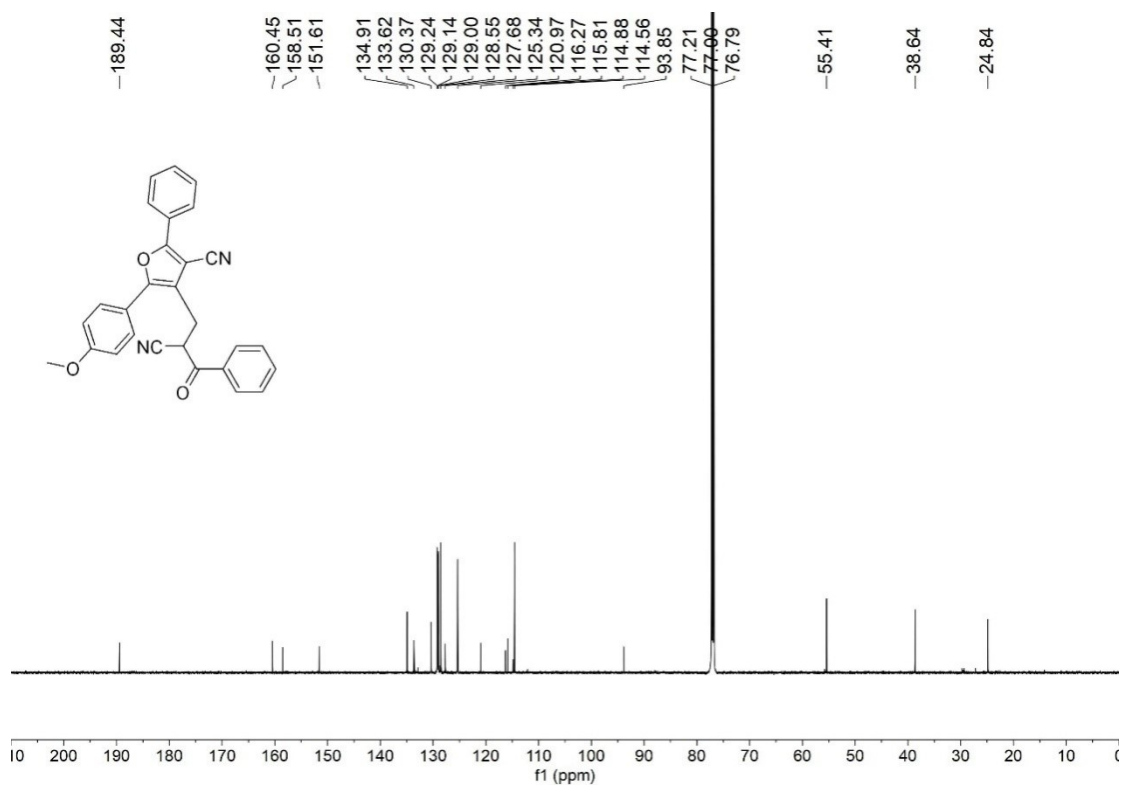

**ethyl 4-(3-ethoxy-2-(4-methoxybenzoyl)-3-oxopropyl)-2-(4-methoxyphenyl)-5-(*p*-tolyl)furan-3-carboxylate (3ab)**

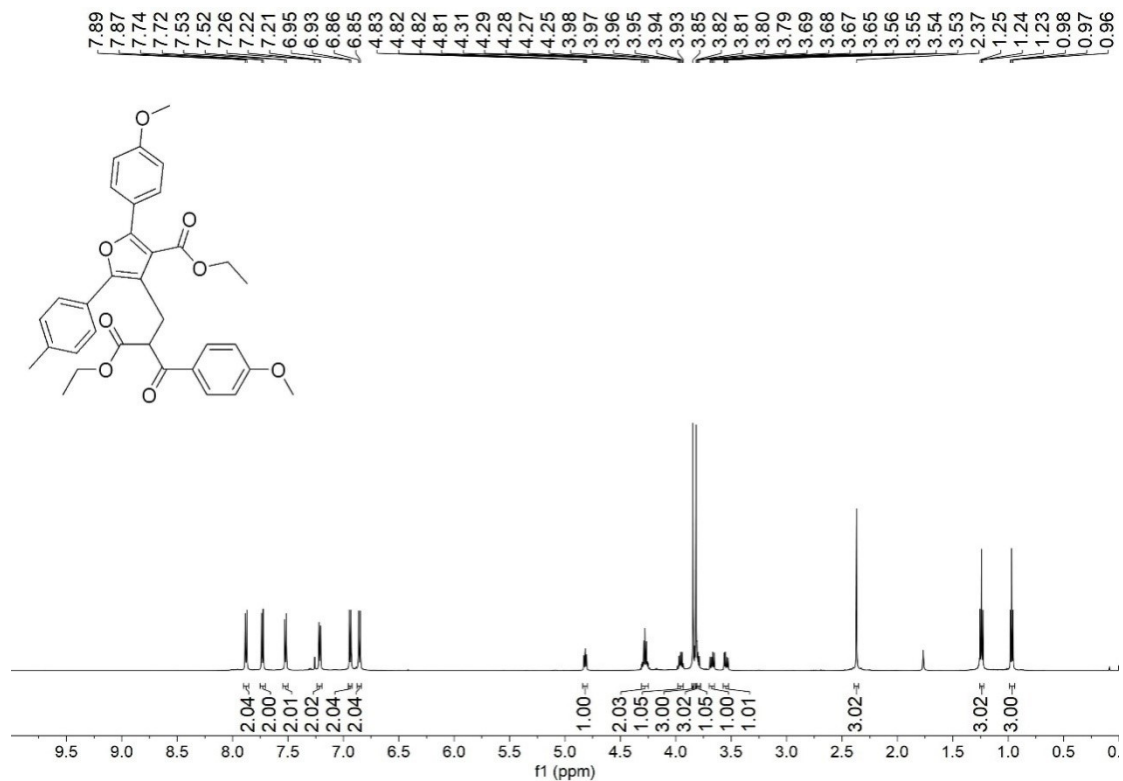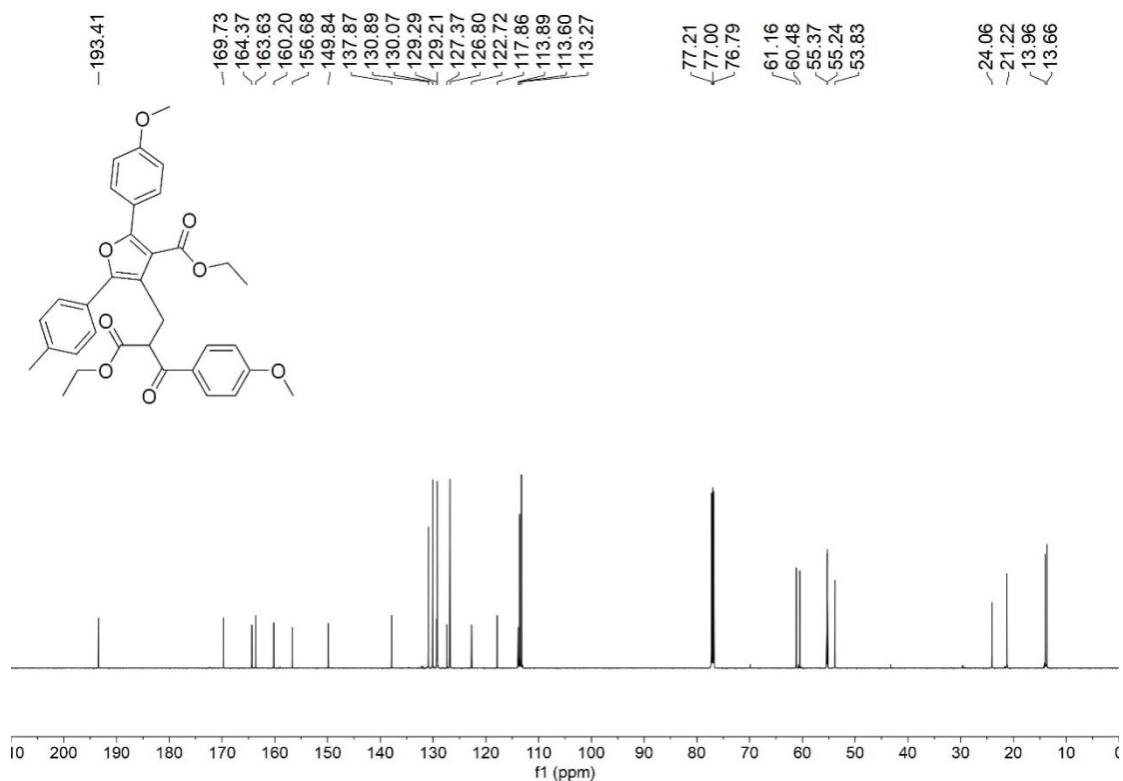

**ethyl 5-(4-*tert*-butylphenyl)-4-(3-ethoxy-2-(4-methoxybenzoyl)-3-oxopropyl)-2-(4-**

**methoxyphenylfuran-3-carboxylate (3ac)**

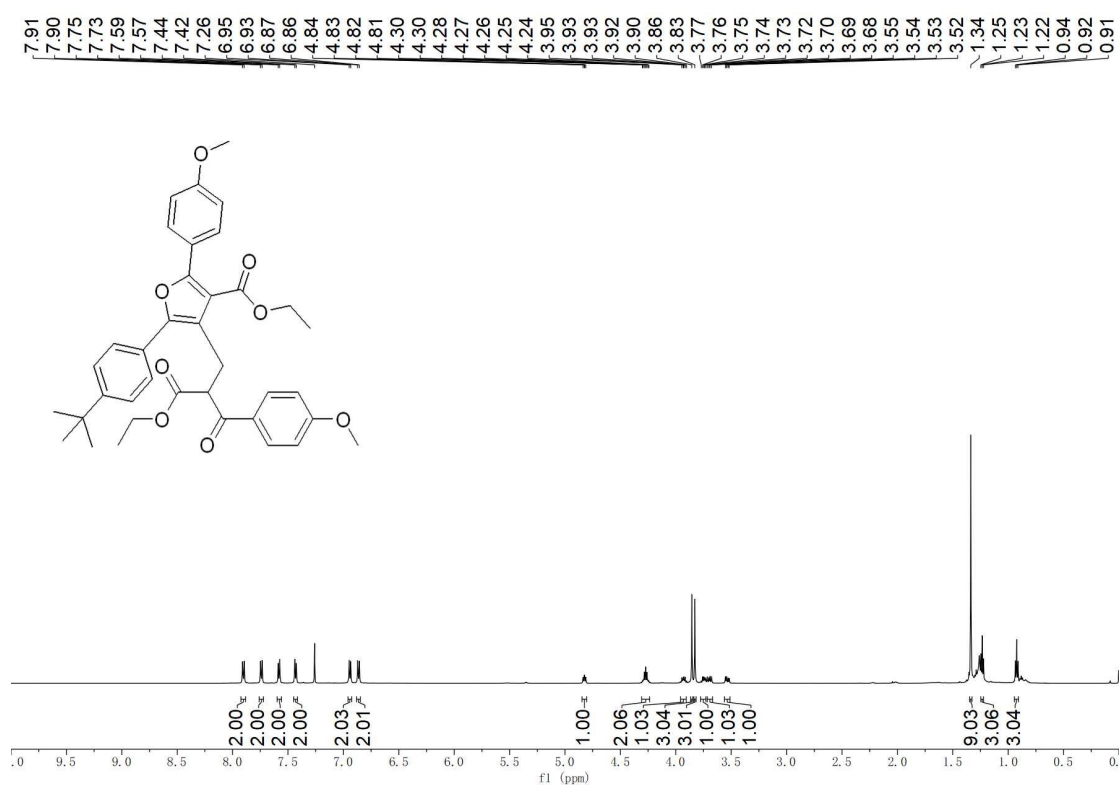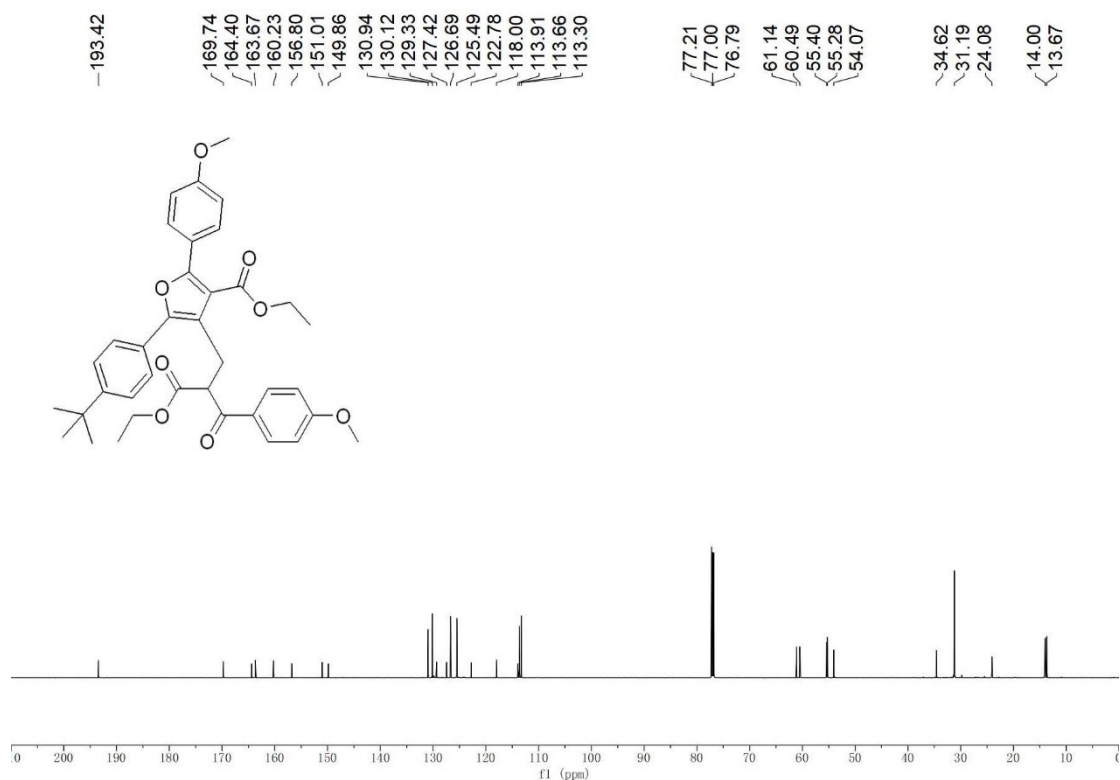

**ethyl 4-(3-ethoxy-2-(4-methoxybenzoyl)-3-oxopropyl)-2-(4-methoxyphenyl)-5-phenylfuran-3-carboxylate (3ad)**

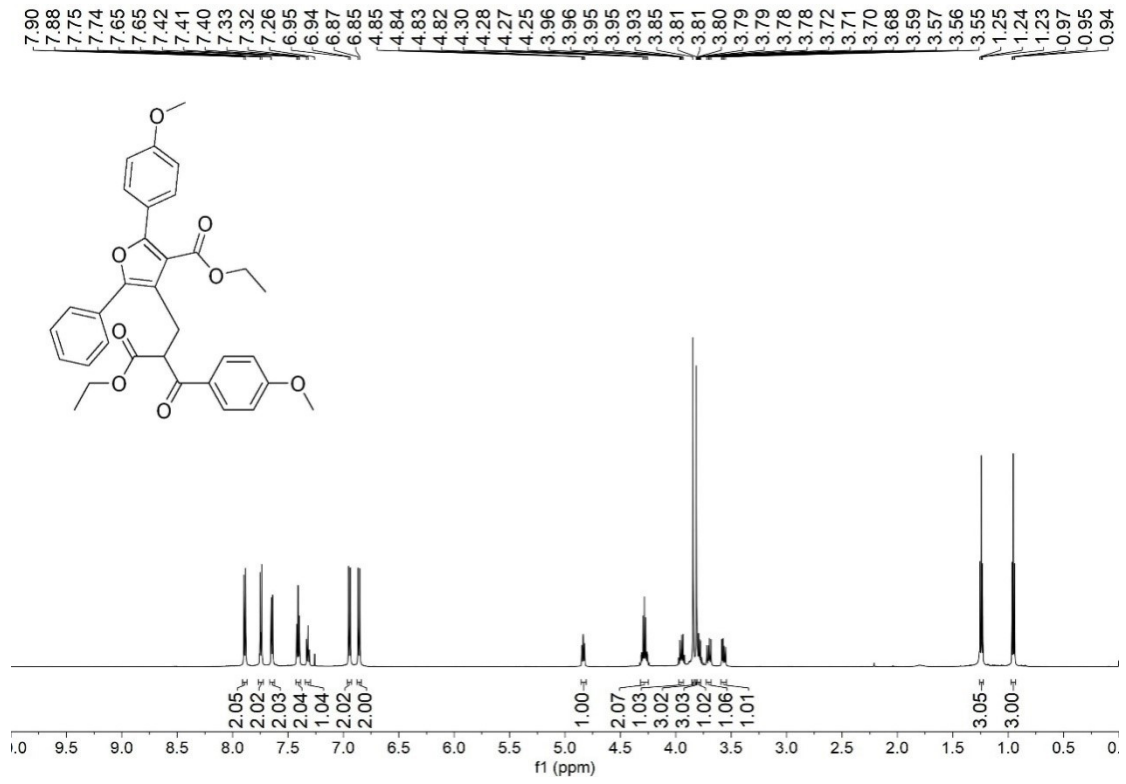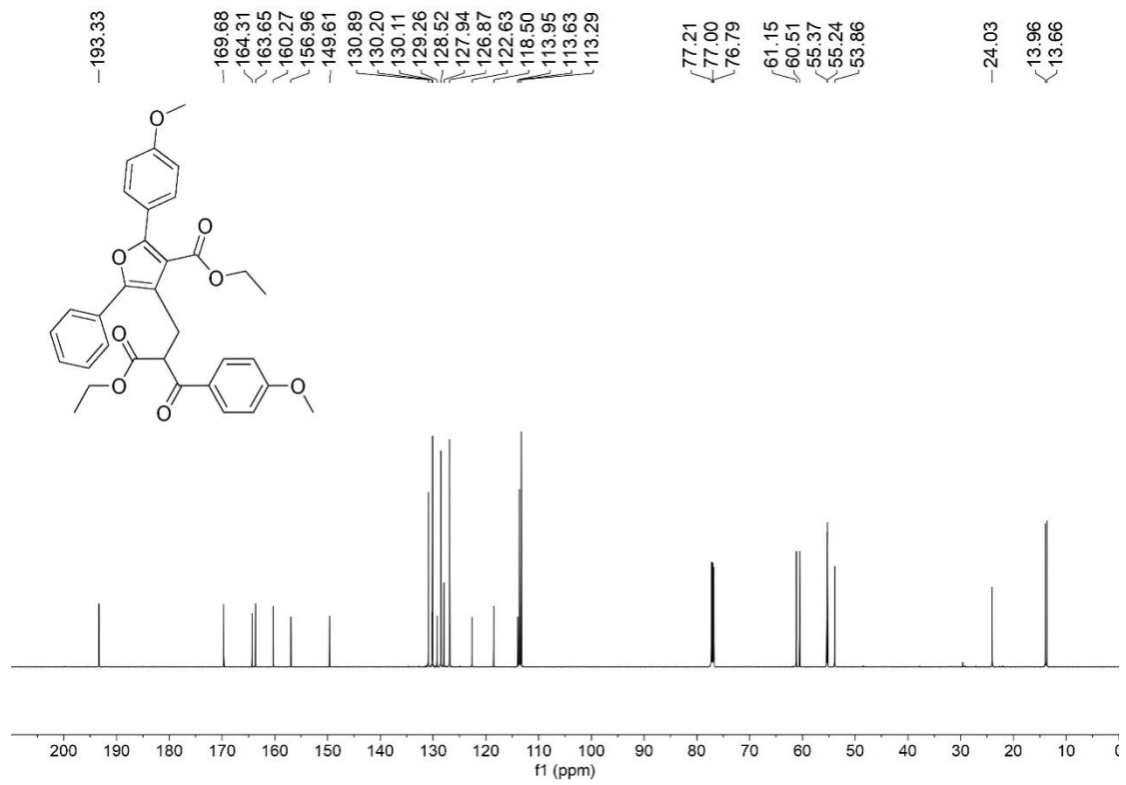





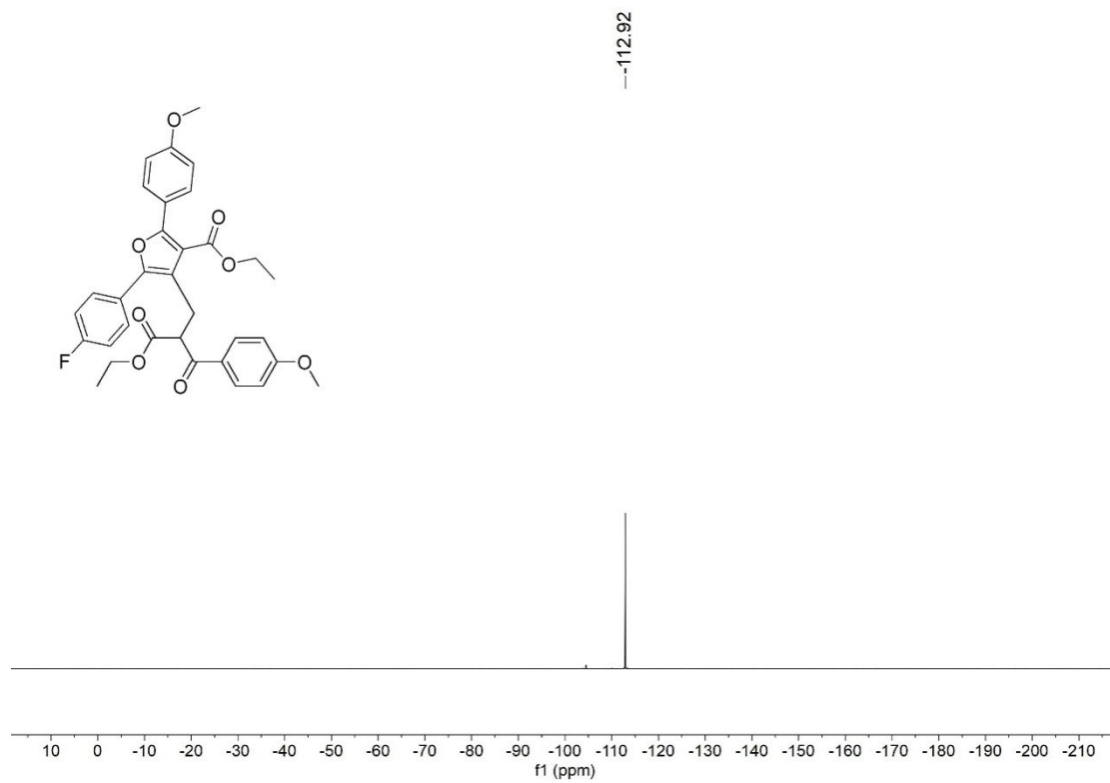

ethyl 5-(3-chlorophenyl)-4-(3-ethoxy-2-(4-methoxybenzoyl)-3-oxopropyl)-2-(4-methoxyphenyl)furan-3-carboxylate (3af)

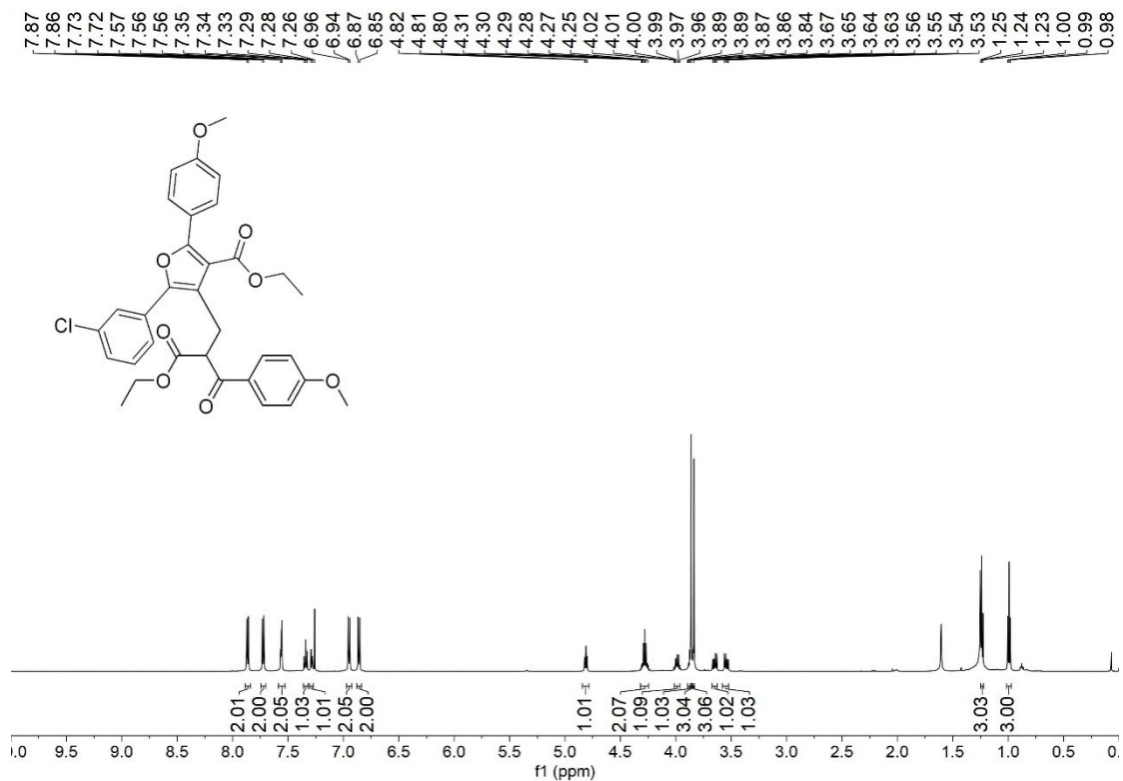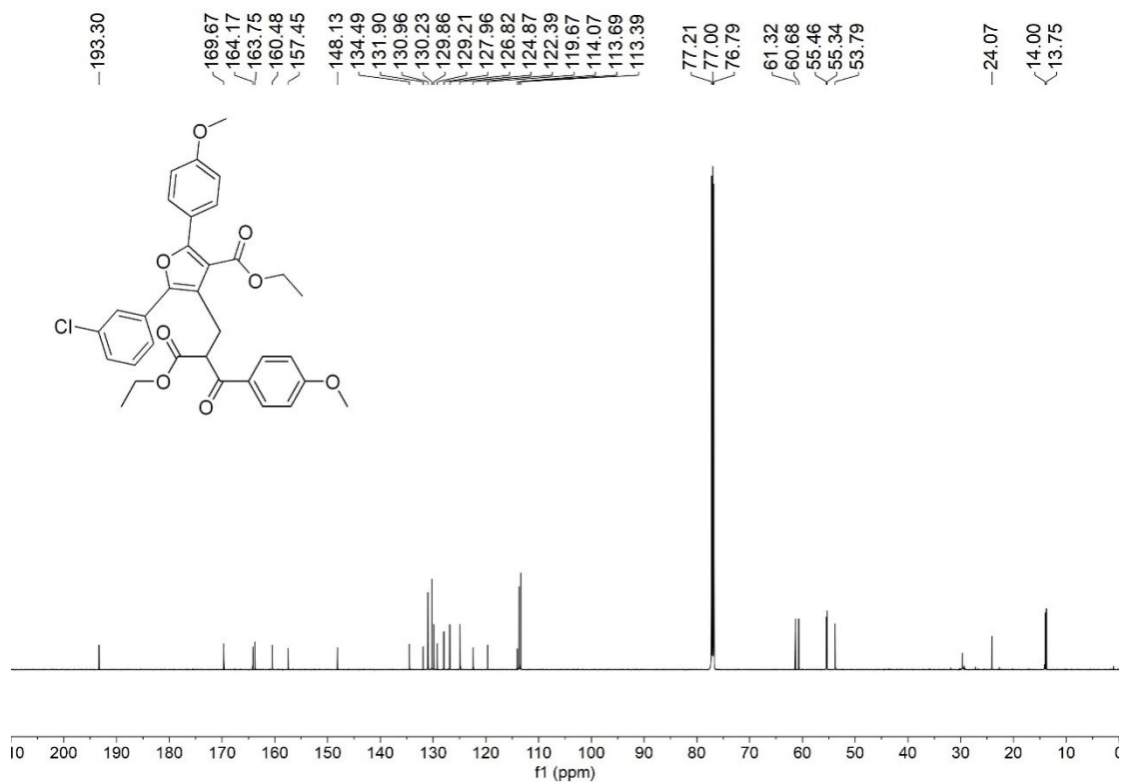

ethyl 4-(3-ethoxy-2-(4-methoxybenzoyl)-3-oxopropyl)-2-(4-methoxyphenyl)-5-(thiophen-2-

**yl)furan-3-carboxylate (3ag)**

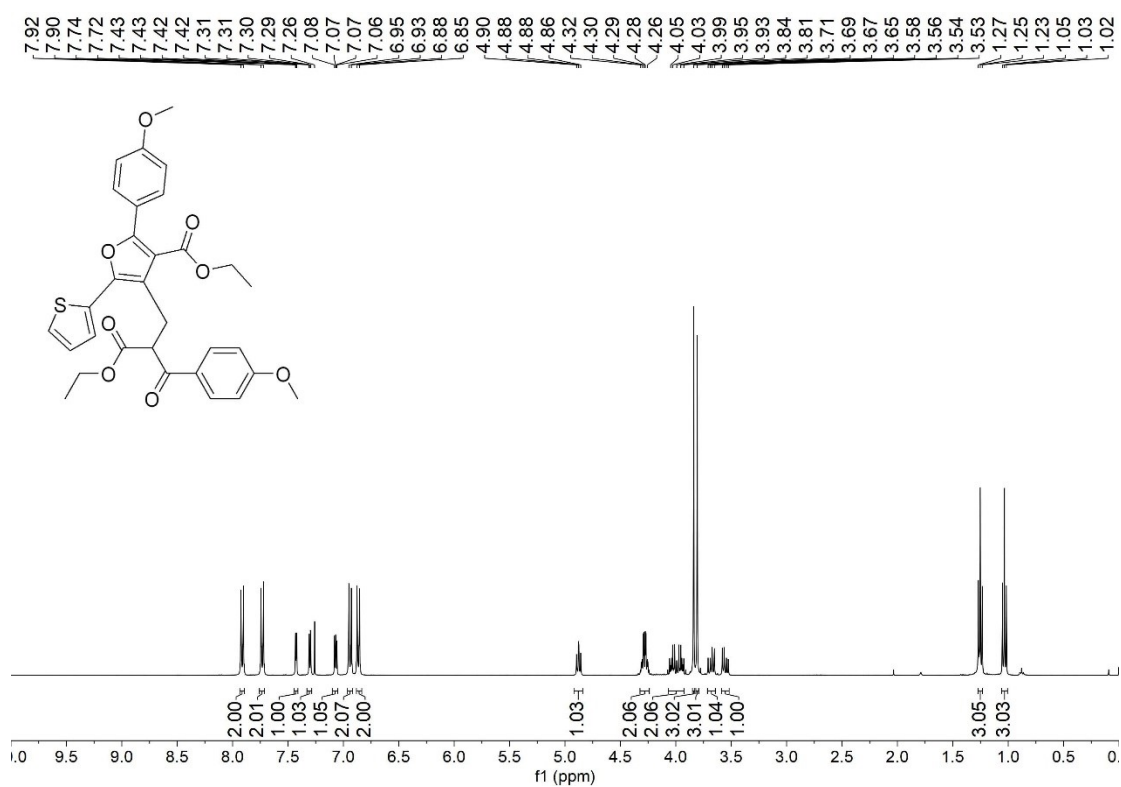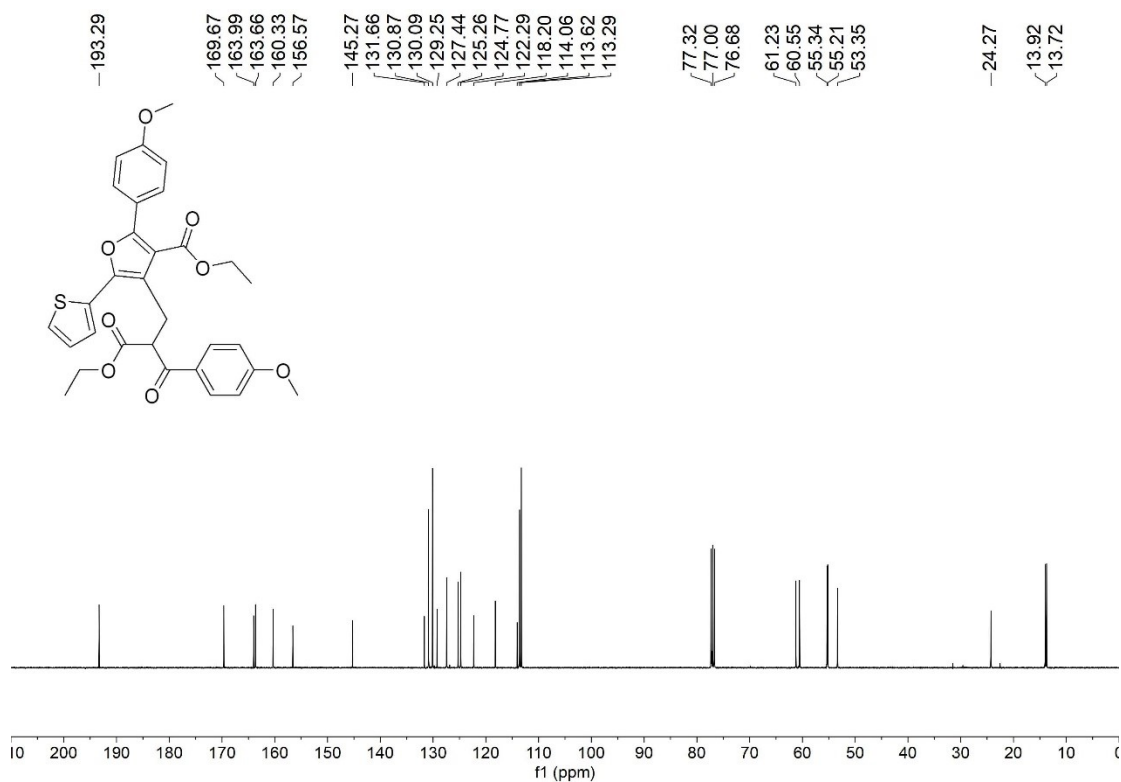

**ethyl 4-(3-ethoxy-2-(4-methoxybenzoyl)-3-oxopropyl)-2-(4-methoxyphenyl)-5-(naphthalen-2-yl)furan-3-carboxylate (3ah)**

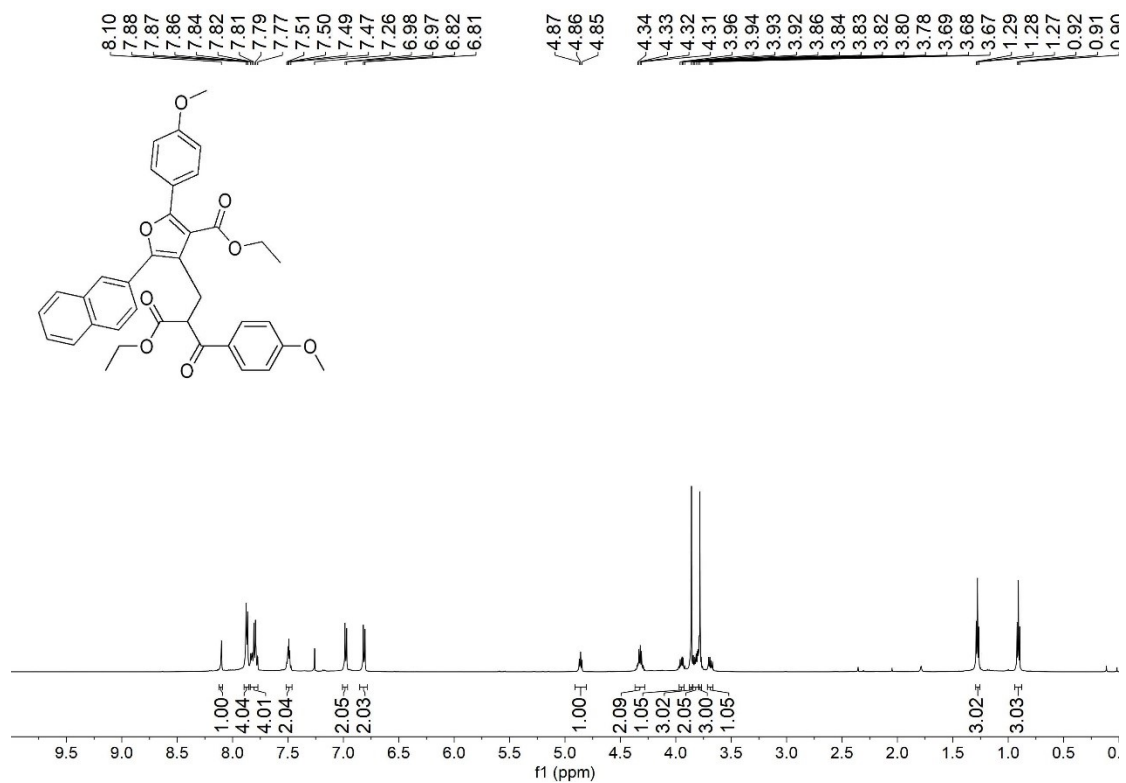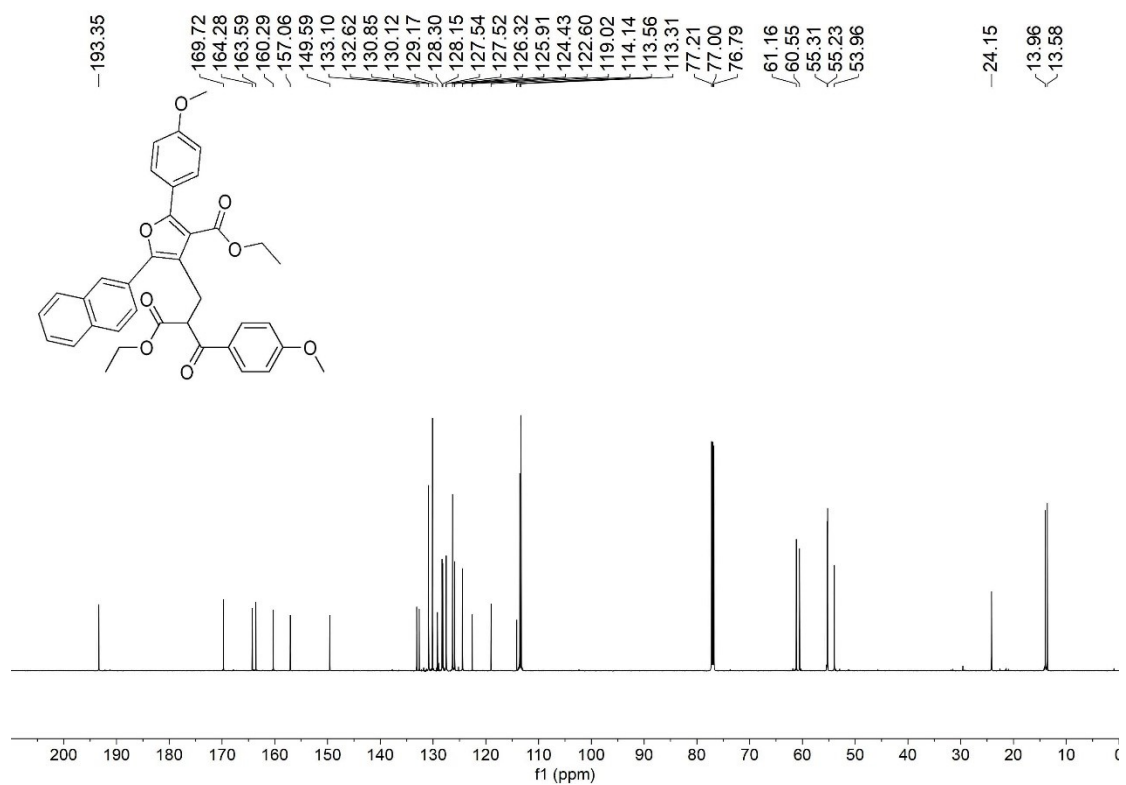

**ethyl 4-(1-ethoxy-2-(4-methoxybenzoyl)-1-oxoundecan-3-yl)-2-(4-methoxyphenyl)-5-phenylfuran-3-carboxylate (3ai)**

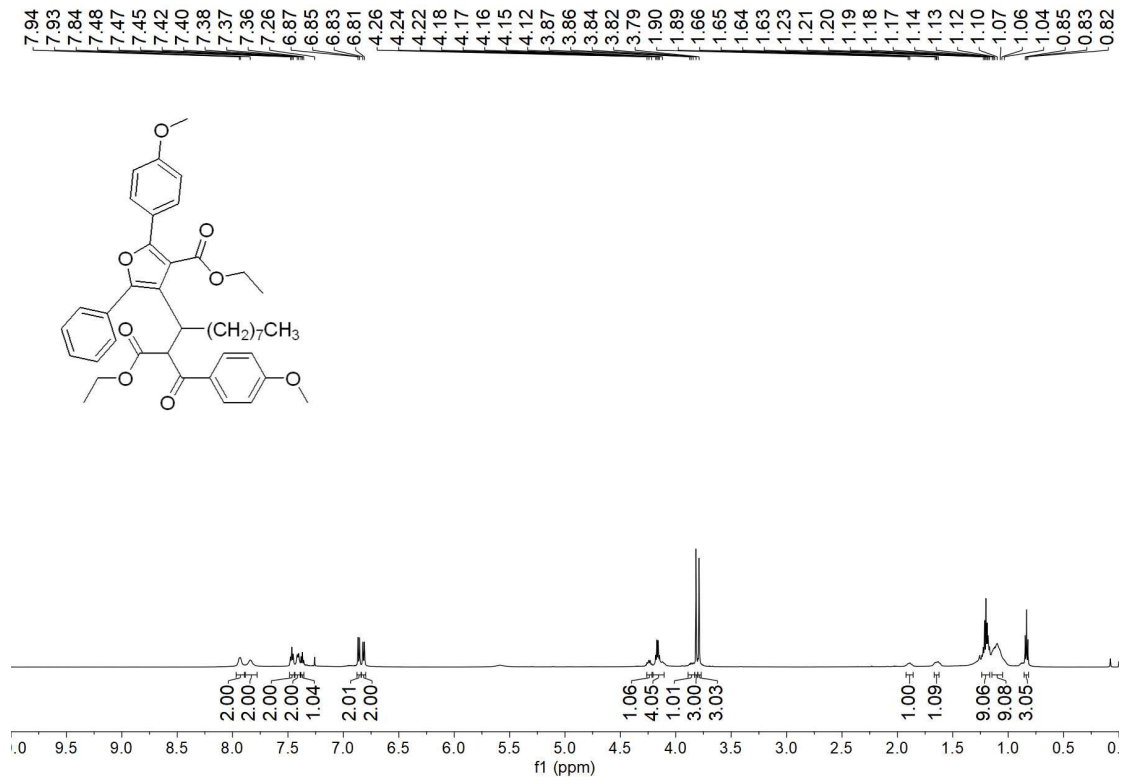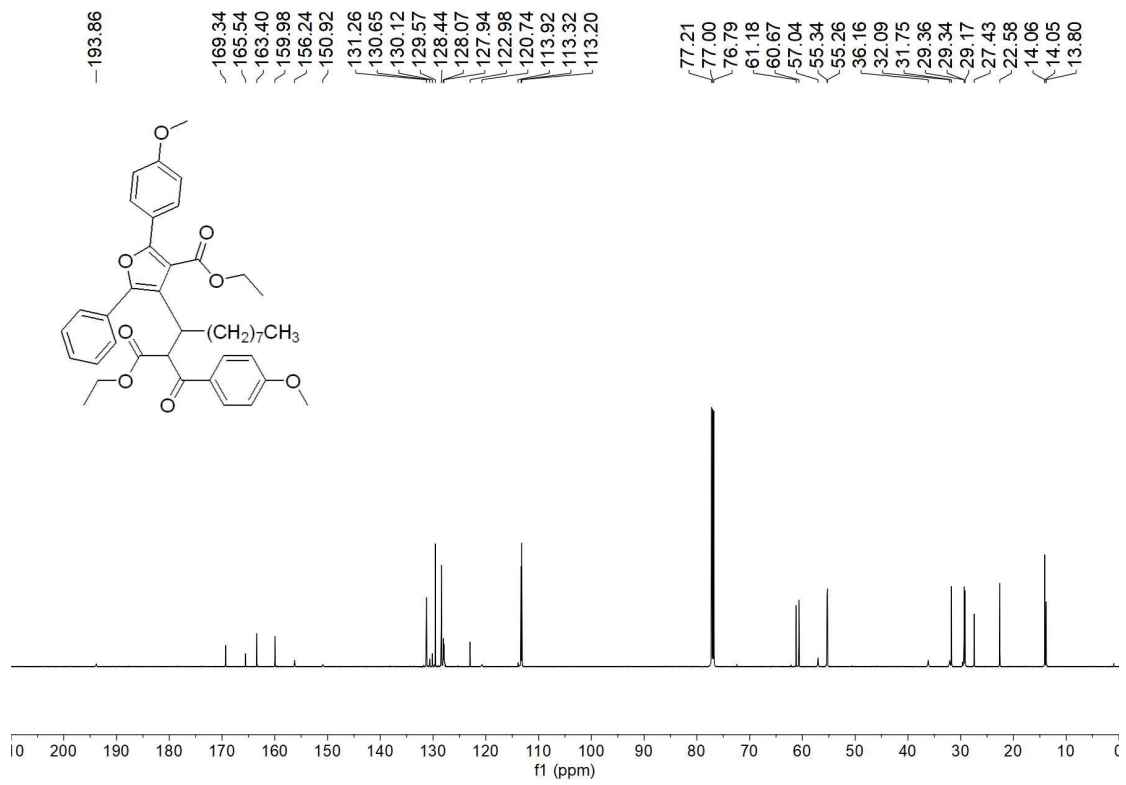

ethyl 4-(3-ethoxy-2-(4-methoxybenzoyl)-3-oxo-1-phenylpropyl)-2-(4-methoxyphenyl)-5-phenylfuran-3-carboxylate (3aj)

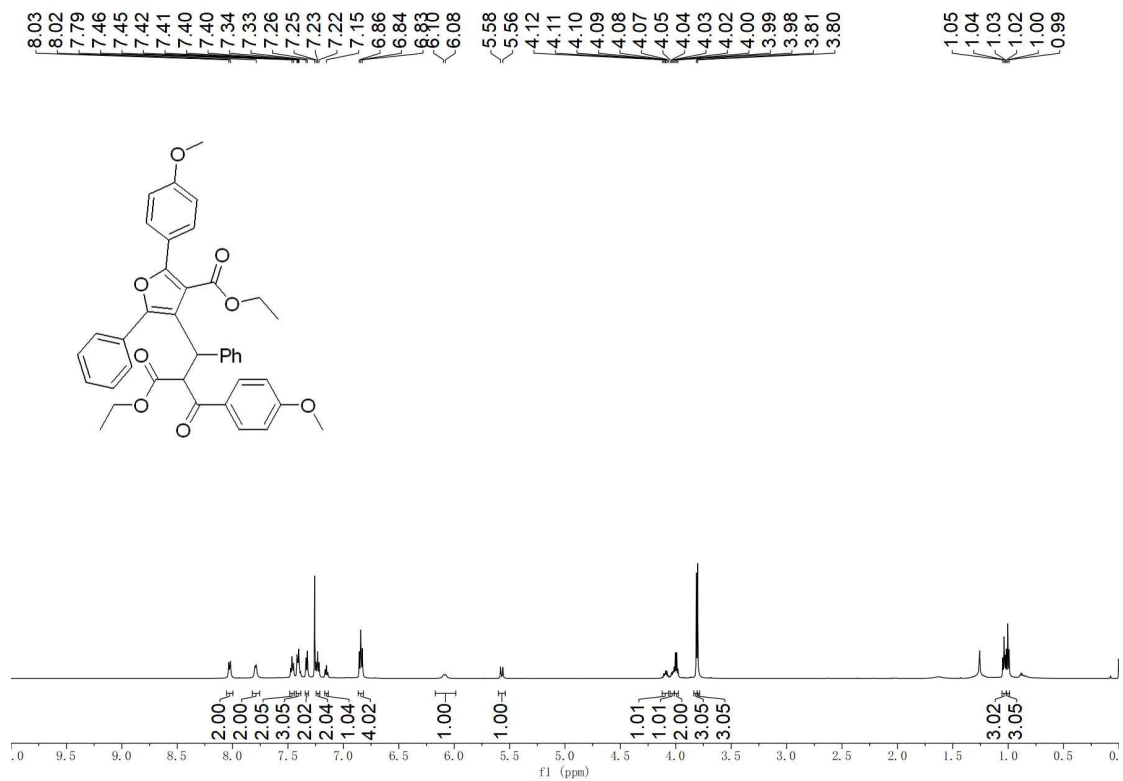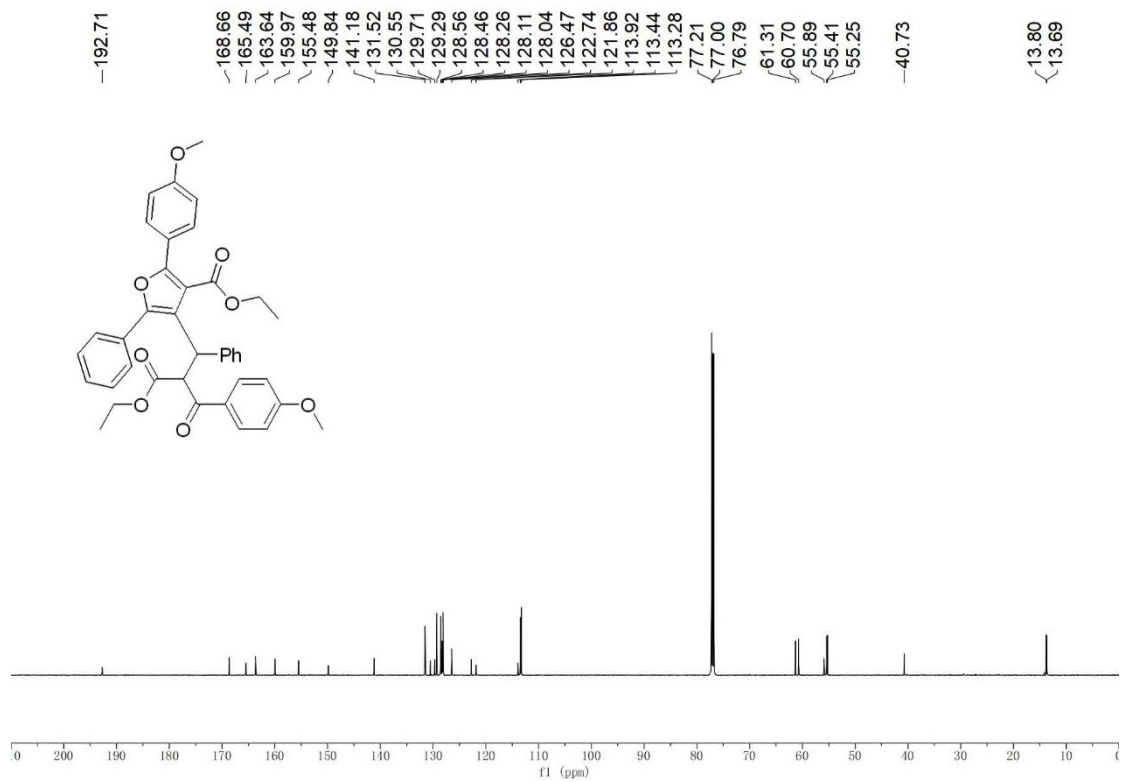

Supplement: d1qo01458g1.pdf [file d1qo01458g1.pdf]
